# Supplementary material for: A general strategy for the synthesis of α-trifluoromethyl- and α-perfluoroalkyl-β-lactams via palladium-catalyzed carbonylation
Source: Royal Society of Chemistry journal article supplement (doi:10.1039/d1sc02212a), 2021-01-01

## Supporting Information

### **A general strategy for the synthesis of $\alpha$ -trifluoromethylated and $\alpha$ -trifluoroalkyl- $\beta$ -lactams via palladium-catalyzed carbonylation**

Yang Li,<sup>\*[a b]</sup> Cai-Lin Zhang,<sup>[a]</sup> Wei-Heng Huang,<sup>[b]</sup> Ning Sun,<sup>[a]</sup> Meng Hao,<sup>[a]</sup>  
Helfried Neumann<sup>[b]</sup> and Matthias Beller<sup>\*[b]</sup>

<sup>a</sup> Xi'an Key Laboratory of Textile Chemical Engineering Auxiliaries, School of Environmental and Chemical Engineering, Xi'an Polytechnic University  
No.19 Jinhua South Road, 710048, Xi'an (China)

<sup>b</sup> Leibniz-Institut für Katalyse e. V. an der Universität Rostock,  
Albert-Einstein Straße 29a, Rostock, 18059, Germany

liyang@xpu.edu.cn; matthias.beller@catalysis.de

## Table of contents

|                                                                                  |     |
|----------------------------------------------------------------------------------|-----|
| 1 General information.....                                                       | S3  |
| 2 General methods.....                                                           | S3  |
| 3 General procedures.....                                                        | S3  |
| 4 Characterization data of the $\alpha$ -CF <sub>3</sub> - $\beta$ -lactams..... | S3  |
| 5 Copies of the NMR spectra of products.....                                     | S21 |

## 1 General information

All reactions were carried out under an atmosphere of dry argon using standard autoclave technique. Chemicals were purchased from Sigma-Aldrich, TCI, Alfa Aesar, Fluorochem, or ABCR. Anilines and 2-Bromo-3,3,3-Trifluoropropane were used without any purification. Other chemicals were used as received. Multiplets of NMR were assigned as s (singlet), d (doublet), t (triplet), dd (doublet of doublet), dt (doublet of triplet), td (triplet of doublet), m (multiplet), and br. s (broad singlet).

## 2 General methods

NMR data were recorded on Bruker Avance 300 or Bruker ARX 400 spectrometers at room temperature.  $^1\text{H}$  NMR,  $^{13}\text{C}$  NMR and  $^{19}\text{F}$  NMR spectra were referenced to signals of deuterium solvents and residual protiated solvents, respectively. High resolution mass spectra (HRMS) were recorded on Agilent 6210. The data are given as mass units per charge (m/z).

## 3 General procedures

The reaction was carried out in an autoclave containing a 5.0 mL glass reaction tube.  $\text{Pd}(\text{OAc})_2$  (0.02 mmol), Ru-Phos (0.05 mmol), aniline (1.0 mmol),  $\text{NEt}_3$  (2.0 mmol), 2-bromo-3,3,3-trifluoro-1-propene (2.0 mmol) and toluene (2.0 mL) were added to the tube. The tube was placed in the autoclave. Once sealed, the autoclave was purged three times with  $\text{CO}$ , then pressurized to 8 atm at room temperature and heated in an oil bath at 100 °C for 12 h. After the reaction, the autoclave was then cooled to room temperature and vented to discharge  $\text{CO}$ . and the crude product was purified by column chromatography on silica gel using a mixture of ethyl acetate and petroleum ether as eluent to give the target compounds.

**Table-S1: Ligand optimization**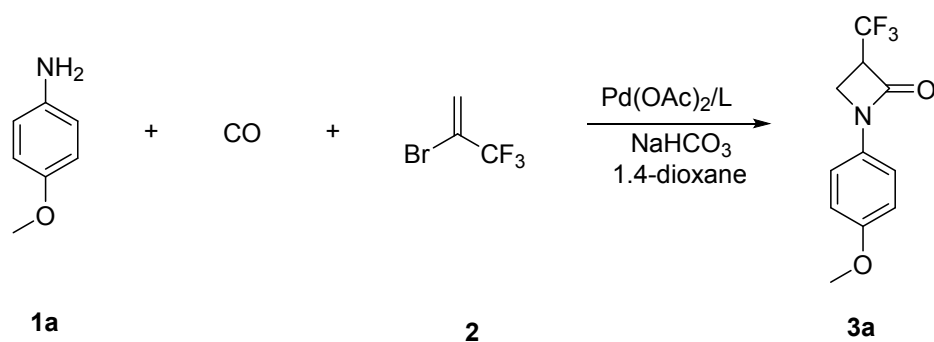

| Entry | Ligand (5.0 mol%) | Yield (%) <sup>b</sup> |
|-------|-------------------|------------------------|
| 1     | L1                | 72                     |
| 2     | L2                | 35                     |
| 3     | L3                | 25                     |
| 4     | L4                | 0                      |
| 5     | L5                | 41                     |
| 6     | L6                | 45                     |
| 7     | L7                | 28                     |
| 8     | L8                | 38                     |
| 9     | L9                | 51                     |
| 10    | L10               | 58                     |

Reaction conditions: **1a** (1.0 mmol), **2** (2.0 mmol), CO (8 atm), Pd(OAc)<sub>2</sub> (2.0 mol%), Ligand (5.0 mol%), NaHCO<sub>3</sub> (2.0 mmol), 1,4-dioxane (2.0 mL), 100 °C, 12 h.

[b] Isolated Yield.

Structure of ligands:

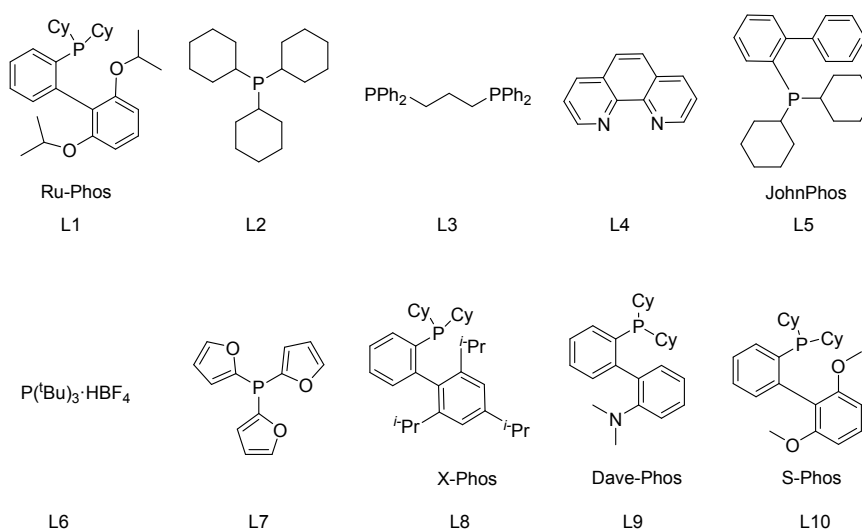

#### 4 Characterization data of the $\alpha$ -CF<sub>3</sub>- $\beta$ -lactams

##### 1-(4-methoxyphenyl)-3-(trifluoromethyl)azetidin-2-one (3a)

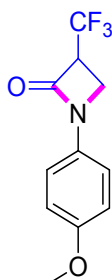

**<sup>1</sup>H NMR (300 MHz, CDCl<sub>3</sub>)**  $\delta$  7.33 (d, 2 H,  $J$  = 9.0 Hz), 6.93 (d, 2 H,  $J$  = 9.0 Hz), 4.05-3.99 (m, 1 H), 3.87-3.82 (m, 4 H), 3.81-3.73 (m, 1 H).

**<sup>13</sup>C NMR (75 MHz, CDCl<sub>3</sub>)**  $\delta$  156.8, 155.9, 131.0, 123.6 (q,  $J$  = 274.5 Hz), 117.9, 114.5, 55.5, 51.6 (q,  $J$  = 24.0 Hz), 39.5.

**<sup>19</sup>F NMR (282 MHz, CDCl<sub>3</sub>)**  $\delta$  -68.5 (s, 3 F).

**HRMS (EI)** [M+H]<sup>+</sup> calcd for C<sub>11</sub>H<sub>11</sub>F<sub>3</sub>NO<sub>2</sub>, 246.0742; found, 246.0744.

##### 1-(4-(methylthio)phenyl)-3-(trifluoromethyl)azetidin-2-one (3b)

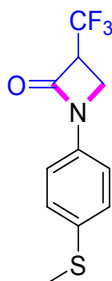

**<sup>1</sup>H NMR (300 MHz, CDCl<sub>3</sub>)**  $\delta$  7.31 (s, 4 H), 4.10-3.98 (m, 1 H), 3.89-3.85 (m, 1 H), 3.79-3.76 (m, 1 H), 2.50 (s, 3 H).

**<sup>13</sup>C NMR (75 MHz, CDCl<sub>3</sub>)**  $\delta$  134.8, 133.1, 128.0, 117.1, 51.6 (q,  $J$  = 31.5 Hz), 39.4 (q,  $J$  = 3.8 Hz), 16.5.

**<sup>19</sup>F NMR (282 MHz, CDCl<sub>3</sub>)**  $\delta$  -68.5 (s, 3 F).

**HRMS (EI)** [M+H]<sup>+</sup> calcd for C<sub>11</sub>H<sub>11</sub>F<sub>3</sub>NOS, 262.0513; found, 262.0514.

### 1-(4-ethoxyphenyl)-3-(trifluoromethyl)azetidin-2-one (3c)

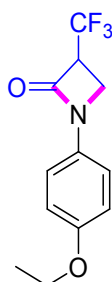

**<sup>1</sup>H NMR (300 MHz, CDCl<sub>3</sub>)**  $\delta$  7.32 (d, 2 H,  $J$  = 9.0 Hz), 6.92 (d, 2 H,  $J$  = 9.0 Hz), 4.07-3.98 (m, 3 H), 3.86-3.73 (m, 1 H), 3.73-3.73 (m, 1 H), 1.43 (t, 3 H,  $J$  = 6.0 Hz).

**<sup>13</sup>C NMR (75 MHz, CDCl<sub>3</sub>)**  $\delta$  156.2, 155.8, 130.8, 123.6 (q,  $J$  = 275.3 Hz), 117.8, 115.1, 63.8, 51.5 (q,  $J$  = 30.8 Hz), 14.8.

**<sup>19</sup>F NMR (282 MHz, CDCl<sub>3</sub>)**  $\delta$  -68.5 (s, 3 F).

**HRMS (EI)** [M+H]<sup>+</sup> calcd for C<sub>12</sub>H<sub>13</sub>F<sub>3</sub>NO<sub>2</sub>, 260.0898; found, 260.0886.

### 1-(4-phenoxyphenyl)-3-(trifluoromethyl)azetidin-2-one (3d)

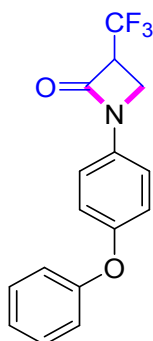

**<sup>1</sup>H NMR (300 MHz, CDCl<sub>3</sub>)**  $\delta$  7.39-7.33 (m, 4 H), 7.15 (t, 1 H,  $J$  = 3.0 Hz), 7.13-6.99 (m, 4 H), 4.09-4.00 (m, 1 H), 3.90-3.80 (m, 1 H), 3.79-3.77 (m, 1 H).

**<sup>13</sup>C NMR (75 MHz, CDCl<sub>3</sub>)**  $\delta$  157.2, 156.2, 154.1, 133.0, 129.8, 123.6 (q,  $J$  = 275.3 Hz), 123.4, 119.9, 118.6, 118.0, 51.6 (q,  $J$  = 31.5 Hz), 39.5 (q,  $J$  = 3.8 Hz).

**<sup>19</sup>F NMR (282 MHz, CDCl<sub>3</sub>)**  $\delta$  -68.5 (s, 3 F).

**HRMS (EI)** [M+H]<sup>+</sup> calcd for C<sub>16</sub>H<sub>13</sub>F<sub>3</sub>NO<sub>2</sub>, 308.0898; found, 308.0902.

### 1-(4-(phenylamino)phenyl)-3-(trifluoromethyl)azetidin-2-one (3e)

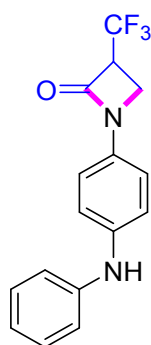

**<sup>1</sup>H NMR (300 MHz, CDCl<sub>3</sub>)**  $\delta$  7.33-7.27 (m, 4 H), 7.11-7.04 (m, 4 H), 7.00-6.94 (m, 1 H), 5.81 (s, 1 H), 4.07-3.95 (m, 1 H), 3.84 (t, 1 H,  $J = 6.0$  Hz), 3.77-3.74 (m, 1 H).

**<sup>13</sup>C NMR (75 MHz, CDCl<sub>3</sub>)**  $\delta$  156.0 (q,  $J = 4.5$  Hz), 143.0, 140.4, 131.7, 129.5, 123.9 (q,  $J = 305.3$  Hz), 119.2, 117.8, 117.6, 51.5 (q,  $J = 31.5$  Hz), 39.4 (q,  $J = 2.3$  Hz).

**<sup>19</sup>F NMR (282 MHz, CDCl<sub>3</sub>)**  $\delta$  -68.4 (s, 3 F).

**HRMS (EI)** [M+H]<sup>+</sup> calcd for C<sub>16</sub>H<sub>14</sub>F<sub>3</sub>NO, 307.1058; found, 307.1052.

### 1-(4-hydroxyphenyl)-3-(trifluoromethyl)azetidin-2-one (3f)

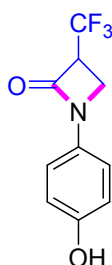

**<sup>1</sup>H NMR (300 MHz, *d*<sub>6</sub>-acetone)**  $\delta$  8.58 (s, 1 H), 7.22 (t, 1 H,  $J = 6.0$  Hz), 7.00 (s, 1 H), 6.88-6.87 (m, 1 H), 6.68-6.65 (m, 1 H), 4.46-4.37 (m, 1 H), 4.06 (t, 1 H,  $J = 6.0$  Hz), 3.88-3.84 (m, 1 H).

**<sup>13</sup>C NMR (75 MHz, *d*<sub>6</sub>-acetone)**  $\delta$  158.2, 139.0, 130.2, 111.7, 107.4, 103.7, 51.1 (q,  $J = 30.0$  Hz), 39.3 (q,  $J = 3.8$  Hz).

**<sup>19</sup>F NMR (282 MHz, *d*<sub>6</sub>-acetone)**  $\delta$  -69.3 (s, 3 F).

**HRMS (EI)** [M+H]<sup>+</sup> calcd for C<sub>10</sub>H<sub>9</sub>F<sub>3</sub>NO<sub>2</sub>, 232.0585; found, 232.0581.

### 1-(4-isopropylphenyl)-3-(trifluoromethyl)azetidin-2-one (3g)

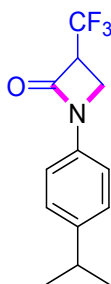

**<sup>1</sup>H NMR (300 MHz, CDCl<sub>3</sub>)**  $\delta$  7.34-7.24 (m, 4 H), 4.05-3.96 (m, 1 H), 3.88-3.84 (m, 1 H), 3.78-3.75 (m, 1 H), 2.97-2.88 (m, 1 H), 1.27 (s, 3 H), 1.25 (s, 3 H).

**<sup>13</sup>C NMR (75 MHz, CDCl<sub>3</sub>)**  $\delta$  156.2, 145.8, 135.2, 127.2, 123.7 (q,  $J = 273.5$  Hz), 116.5, 113.4, 51.5 (q,  $J = 30.7$  Hz), 39.3 (q,  $J = 3.0$  Hz), 33.7, 24.0.

**<sup>19</sup>F NMR (282 MHz, CDCl<sub>3</sub>)**  $\delta$  -68.5 (s, 3 F).

**HRMS (EI)** [M+H]<sup>+</sup> calcd for C<sub>13</sub>H<sub>15</sub>F<sub>3</sub>NO, 258.1106; found, 258.1102.

### 1-(4-(dimethylamino)phenyl)-3-(trifluoromethyl)azetidin-2-one (3h)

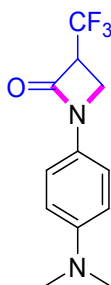

**<sup>1</sup>H NMR (300 MHz, CDCl<sub>3</sub>)**  $\delta$  7.28 (d, 2 H,  $J = 9.0$  Hz), 6.73 (d, 2 H,  $J = 9.0$  Hz), 4.04-3.92 (m, 1 H), 3.80 (t, 1 H,  $J = 6.0$  Hz), 3.78-3.69 (m, 1 H), 2.95 (s, 6 H).

**<sup>13</sup>C NMR (75 MHz, CDCl<sub>3</sub>)**  $\delta$  155.7 (q,  $J = 3.0$  Hz), 148.2, 127.9, 124.1 (q,  $J = 247.5$  Hz), 117.8, 112.9, 51.4 (q,  $J = 30.0$  Hz), 40.7, 39.3 (q,  $J = 3.0$  Hz).

**<sup>19</sup>F NMR (282 MHz, CDCl<sub>3</sub>)**  $\delta$  -68.8 (s, 3 F).

**HRMS (EI)** [M+H]<sup>+</sup> calcd for C<sub>12</sub>H<sub>14</sub>F<sub>3</sub>N<sub>2</sub>O, 259.1058; found, 259.1056.



### 1-phenyl-3-(trifluoromethyl)azetidin-2-one (3i)

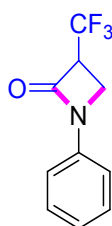

**<sup>1</sup>H NMR (300 MHz, *d*<sub>6</sub>-acetone)**  $\delta$  7.48-7.39 (m, 4 H), 7.21-7.15 (m, 1 H), 4.51-4.38 (m, 1 H), 4.10 (t, *J* = 6.0 Hz), 3.92-3.89 (m, 1 H).

**<sup>13</sup>C NMR (75 MHz, *d*<sub>6</sub>-acetone)**  $\delta$  156.8 (q, *J* = 4.5 Hz), 139.3, 129.2, 124.4, 124.6 (q, *J* = 240.8 Hz), 116.4, 51.2 (q, *J* = 30.8 Hz), 39.2 (q, *J* = 3.0 Hz).

**<sup>19</sup>F NMR (282 MHz, *d*<sub>6</sub>-acetone)**  $\delta$  -69.4 (s, 3 F).

**HRMS (EI)** [M+H]<sup>+</sup> calcd for C<sub>10</sub>H<sub>9</sub>F<sub>3</sub>NO, 216.0636; found, 216.0632.

### 1-(4-fluorophenyl)-3-(trifluoromethyl)azetidin-2-one (3j)

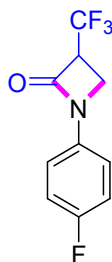

**<sup>1</sup>H NMR (300 MHz, CDCl<sub>3</sub>)**  $\delta$  7.38-7.33 (m, 2 H), 7.11-7.06 (m, 2 H), 4.09-3.99 (m, 1 H), 3.88 (t, 1 H, *J* = 6.0 Hz), 3.79-3.76 (m, 1 H).

**<sup>13</sup>C NMR (75 MHz, CDCl<sub>3</sub>)**  $\delta$  161.3, 158.0, 156.3 (q, *J* = 4.5 Hz), 133.6 (d, *J* = 2.3 Hz), 123.5 (q, *J* = 261.8 Hz), 118.0 (d, *J* = 8.3 Hz), 116.2 (d, *J* = 2.3 Hz), 51.7 (q, *J* = 31.5 Hz), 39.5 (q, *J* = 3.1 Hz).

**<sup>19</sup>F NMR (282 MHz, CDCl<sub>3</sub>)**  $\delta$  -68.7 (s, 3 F), -116.3 (s, 1 F).

**HRMS (EI)** [M+H]<sup>+</sup> calcd for C<sub>10</sub>H<sub>8</sub>F<sub>4</sub>NO, 234.0542; found, 234.0540.

### 1-(4-chlorophenyl)-3-(trifluoromethyl)azetidin-2-one (3k)

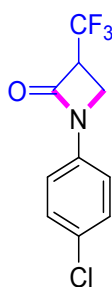

**<sup>1</sup>H NMR (300 MHz, CDCl<sub>3</sub>)**  $\delta$  7.38-7.31 (m, 4 H), 4.12-4.00 (m, 1 H), 3.86 (t, 1 H,  $J = 6.0$  Hz), 3.80-3.77 (m, 1 H).

**<sup>13</sup>C NMR (75 MHz, CDCl<sub>3</sub>)**  $\delta$  156.4, 135.8, 130.1, 129.5, 123.4 (q,  $J = 274.5$  Hz), 117.7, 51.8 (q,  $J = 31.5$  Hz), 39.5 (q,  $J = 3.0$  Hz).

**<sup>19</sup>F NMR (282 MHz, CDCl<sub>3</sub>)**  $\delta$  -68.5 (s, 3 F).

**HRMS (EI)** [M+H]<sup>+</sup> calcd for C<sub>10</sub>H<sub>8</sub>ClF<sub>3</sub>NO, 250.0247; found, 250.0250.

### ethyl 4-(2-oxo-3-(trifluoromethyl)azetidin-1-yl)benzoate (3l)

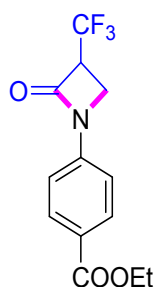

**<sup>1</sup>H NMR (300 MHz, d<sub>4</sub>-MeOD)**  $\delta$  8.06 (d, 2 H,  $J = 9.0$  Hz), 7.50 (d, 2 H,  $J = 9.0$  Hz), 4.45-4.39 (m, 3 H), 4.04 (t, 1 H,  $J = 6.0$  Hz), 3.92-3.88 (m, 1 H), 1.40 (t, 3 H,  $J = 6.0$  Hz).

**<sup>13</sup>C NMR (400 MHz NMR, 100 MHz, d<sub>4</sub>-MeOD)**  $\delta$  169.3, 161.7 (q,  $J = 4.0$  Hz), 145.1, 134.5, 130.8, 127.9 (q,  $J = 273.0$  Hz), 119.9, 64.7, 55.3 (q,  $J = 30.0$  Hz), 43.4 (q,  $J = 3.0$  Hz), 17.9.

**<sup>19</sup>F NMR (282 MHz, d<sub>4</sub>-MeOD)**  $\delta$  -70.4 (s, 3 F).

**HRMS (EI)** [M+H]<sup>+</sup> calcd for C<sub>13</sub>H<sub>13</sub>F<sub>3</sub>NO<sub>3</sub>, 288.0484; found, 288.0480.

### 1-(3-methoxyphenyl)-3-(trifluoromethyl)azetidin-2-one (3m)

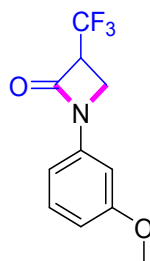

**<sup>1</sup>H NMR (300 MHz, CDCl<sub>3</sub>)**  $\delta$  7.28 (t, 1 H,  $J$  = 6.0 Hz), 7.03 (t, 1 H,  $J$  = 3.0 Hz), 6.89- 6.86 (m, 1 H), 6.75- 6.71 (m, 1 H), 4.07-3.96 (m, 1 H), 3.86 (t, 1 H,  $J$  = 6.0 Hz), 3.83 (s, 3 H), 3.78-3.74 (m, 1 H).

**<sup>13</sup>C NMR (400 MHz NMR, 100 MHz, CDCl<sub>3</sub>)**  $\delta$  161.8, 156.6 (q,  $J$  = 5.0 Hz), 138.4, 130.2, 123.8 (q,  $J$  = 227.0 Hz), 110.8, 108.5, 102.6, 55.4, 51.5 (q,  $J$  = 31.0 Hz), 39.5 (q,  $J$  = 3.0 Hz).

**<sup>19</sup>F NMR (282 MHz, CDCl<sub>3</sub>)**  $\delta$  -68.7 (s, 3 F).

**HRMS (EI)** [M+H]<sup>+</sup> calcd for C<sub>11</sub>H<sub>11</sub>F<sub>3</sub>NO<sub>2</sub>, 246.0742; found, 246.0744.

### 1-(3-hydroxyphenyl)-3-(trifluoromethyl)azetidin-2-one (3n)

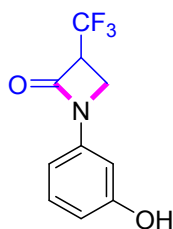

**<sup>1</sup>H NMR (300 MHz, d<sub>6</sub>-acetone)**  $\delta$  8.63 (s, 1 H), 7.22 (t, 1 H,  $J$  = 6.0 Hz), 7.01 (t, 1 H,  $J$  = 3.0 Hz), 6.88- 6.84 (m, 1 H), 6.68- 6.64 (m, 1 H), 4.49- 4.36 (m, 1 H), 4.06 (t, 1 H,  $J$  = 6.0 Hz), 3.88-3.84 (m, 1 H).

**<sup>13</sup>C NMR (75 MHz, d<sub>6</sub>-acetone)**  $\delta$  154.6, 141.0, 130.2, 111.7, 107.4, 103.8, 51.1 (q,  $J$  = 30.8 Hz), 39.4.

**<sup>19</sup>F NMR (282 MHz, d<sub>6</sub>-acetone)**  $\delta$  -69.3 (s, 3 F).

**HRMS (EI)** [M+H]<sup>+</sup> calcd for C<sub>10</sub>H<sub>9</sub>F<sub>3</sub>NO<sub>2</sub>, 232.0585; found, 232.0590.

### 3-(2-oxo-3-(trifluoromethyl)azetid-1-yl)benzonitrile (3o)

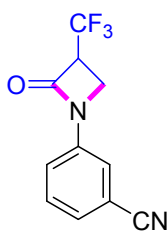

**<sup>1</sup>H NMR (300 MHz, CDCl<sub>3</sub>)**  $\delta$  7.69-7.62 (m, 2 H), 7.55-7.47 (m, 2 H), 4.15-4.06 (m, 1 H), 3.94 (t, 1 H, *J* = 6.0 Hz), 3.86-3.83 (m, 1 H).

**<sup>13</sup>C NMR (75 MHz, CDCl<sub>3</sub>)**  $\delta$  137.9, 130.4, 128.4, 120.8, 119.5, 117.9, 113.6, 100.0, 52.1 (d, *J* = 35.3 Hz), 39.6 (d, *J* = 3.8 Hz).

**<sup>19</sup>F NMR (282 MHz, CDCl<sub>3</sub>)**  $\delta$  -68.4 (s, 3 F).

**HRMS (EI)** [M+H]<sup>+</sup> calcd for C<sub>11</sub>H<sub>8</sub>F<sub>3</sub>N<sub>2</sub>O, 241.0589; found, 241.0581.

### methyl 3-(2-oxo-3-(trifluoromethyl)azetid-1-yl)benzoate (3p)

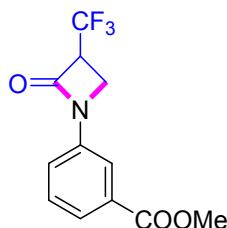

**<sup>1</sup>H NMR (300 MHz, CDCl<sub>3</sub>)**  $\delta$  7.78-7.67 (m, 3 H), 7.38 (t, 1 H, *J* = 9.0 Hz), 4.03-3.96 (m, 1 H), 3.88-3.84 (m, 4 H), 3.77-3.74 (m, 1 H).

**<sup>13</sup>C NMR (75 MHz, CDCl<sub>3</sub>)**  $\delta$  167.9, 156.6 (q, *J* = 2.3 Hz), 137.5, 131.3, 129.6, 126.0, 123.4 (q, *J* = 274.5), 121.5, 116.6, 52.4, 51.7 (q, *J* = 31.5 Hz), 39.6 (q, *J* = 3.0 Hz).

**<sup>19</sup>F NMR (282 MHz, CDCl<sub>3</sub>)**  $\delta$  -68.5 (s, 3 F).

**HRMS (EI)** [M+H]<sup>+</sup> calcd for C<sub>12</sub>H<sub>3</sub>F<sub>3</sub>NO<sub>3</sub>, 274.0691; found, 274.0685.

### 1-(2-methoxyphenyl)-3-(trifluoromethyl)azetid-2-one (3q)

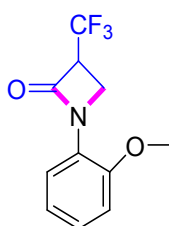

**<sup>1</sup>H NMR (300 MHz, CDCl<sub>3</sub>)** δ 7.91 (dd, 1 H, *J* = 6.0, 3.0 Hz), 7.19-7.13 (m, 1 H), 7.00- 6.92 (m, 2 H), 4.20- 4.15 (m, 1 H), 4.09-3.96 (m, 2 H), 3.87 (s, 3 H).

**<sup>13</sup>C NMR (75 MHz, CDCl<sub>3</sub>)** δ 158.1, 150.3, 129.8, 126.3, 126.0, 123.8 (q, *J* = 274.5 Hz), 122.9, 121.1, 111.3, 55.6, 53.2 (q, *J* = 30.8 Hz), 44.1 (q, *J* = 3.0 Hz).

**<sup>19</sup>F NMR (282 MHz, CDCl<sub>3</sub>)** δ -68.4 (s, 3 F).

**HRMS (EI)** [M+H]<sup>+</sup> calcd for C<sub>11</sub>H<sub>11</sub>F<sub>3</sub>NO<sub>2</sub>, 246.0742; found, 246.0744.

### 1-(3,4-dimethylphenyl)-3-(trifluoromethyl)azetidin-2-one (3r)

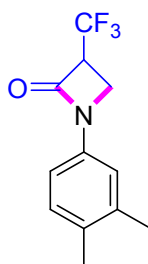

**<sup>1</sup>H NMR (300 MHz, CDCl<sub>3</sub>)** δ 7.21 (d, 1 H, *J* = 3.0 Hz), 7.15- 7.06 (m, 2 H), 4.06- 3.94 (m, 1 H), 3.84 (t, 1 H, *J* = 6.0 Hz), 3.76- 3.73 (m, 1 H), 2.29 (s, 3 H), 2.26 (s, 3 H).

**<sup>13</sup>C NMR (400 MHz NMR, 100 MHz, CDCl<sub>3</sub>)** δ 156.3 (q, *J* = 3.0 Hz), 139.9, 135.3, 133.5, 127.8, 123.7 (q, *J* = 275.0 Hz), 117.7, 113.8, 51.4 (q, *J* = 31.0 Hz), 39.3 (q, *J* = 4.0 Hz), 19.8, 19.3.

**<sup>19</sup>F NMR (282 MHz, CDCl<sub>3</sub>)** δ -68.4 (s, 3 F).

**HRMS (EI)** [M+H]<sup>+</sup> calcd for C<sub>12</sub>H<sub>13</sub>F<sub>3</sub>NO, 244.0949; found, 244.0945.

### 1-(3,5-dimethylphenyl)-3-(trifluoromethyl)azetidin-2-one (3s)

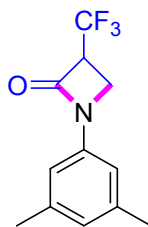

**<sup>1</sup>H NMR (300 MHz, CDCl<sub>3</sub>)** δ 7.02 (s, 2 H), 6.85 (s, 1 H), 4.04-3.93 (m, 1 H), 3.84 (t, 1 H, *J* = 6.0 Hz), 3.77-3.73 (m, 1 H), 2.34 (s, 6 H).

**<sup>13</sup>C NMR (75 MHz, CDCl<sub>3</sub>)** δ 153.0, 135.3, 133.3, 125.1, 119.7 (q, *J* = 279.0 Hz), 110.3, 47.4 (q, *J* = 31.5 Hz), 35.4 (q, *J* = 3.8 Hz), 14.3.

**<sup>19</sup>F NMR (282 MHz, CDCl<sub>3</sub>)** δ -68.4 (s, 3 F).

**HRMS (EI)** [M+H]<sup>+</sup> calcd for C<sub>12</sub>H<sub>13</sub>F<sub>3</sub>NO, 244.0949; found, 244.0945.

**1-(2,3-dihydrobenzo[b][1,4]dioxin-6-yl)-3-(trifluoromethyl)azetidin-2-one (3t)**

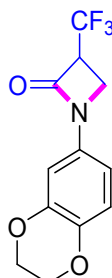

**<sup>1</sup>H NMR (300 MHz, CDCl<sub>3</sub>)** δ 6.94 (s, 1 H), 6.87 (s, 2 H), 4.29-4.24 (m, 4 H), 4.04-3.97 (m, 1 H), 3.81 (t, 1 H, *J* = 6.0 Hz), 3.73-3.70 (m, 1 H).

**<sup>13</sup>C NMR (75 MHz, CDCl<sub>3</sub>)** δ 156.1, 143.9, 140.9, 131.4, 123.6 (q, *J* = 275.3 Hz), 117.7, 109.8, 106.0, 64.5, 64.3, 51.4 (q, *J* = 31.5 Hz), 39.5 (q, *J* = 3.8 Hz).

**<sup>19</sup>F NMR (282 MHz, CDCl<sub>3</sub>)** δ -68.5 (s, 3 F).

**HRMS (EI)** [M+H]<sup>+</sup> calcd for C<sub>12</sub>H<sub>11</sub>F<sub>3</sub>NO<sub>2</sub>, 274.0691; found, 274.0691.

**3-(trifluoromethyl)-1-(3,4,5-trimethoxyphenyl)azetidin-2-one (3u)**

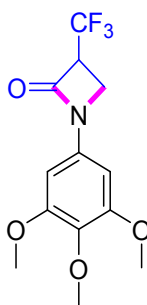

**<sup>1</sup>H NMR (300 MHz, CDCl<sub>3</sub>)** δ 6.59 (s, 1 H), 4.10-3.99 (m, 1 H), 3.87-3.80 (m, 10 H), 3.76-3.73 (m, 1 H).

**<sup>13</sup>C NMR (75 MHz, CDCl<sub>3</sub>)** δ 156.4 (q, *J* = 4.5 Hz), 154.3, 135.3, 133.6, 123.6 (q, *J* = 274.5 Hz), 94.6, 60.9, 56.2, 51.4 (q, *J* = 30.8 Hz), 39.7 (q, *J* = 3.8 Hz).

**<sup>19</sup>F NMR (282 MHz, CDCl<sub>3</sub>)** δ -68.4 (s, 3 F).

**HRMS (EI)** [M+H]<sup>+</sup> calcd for C<sub>13</sub>H<sub>15</sub>F<sub>3</sub>NO<sub>4</sub>, 306.0953; found, 306.0951.

### 1-(1-methyl-1H-indol-5-yl)-3-(trifluoromethyl)azetidin-2-one (3v)

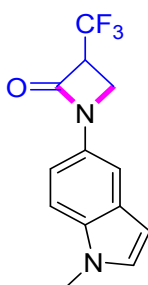

**<sup>1</sup>H NMR (300 MHz, CDCl<sub>3</sub>)** δ 7.54 (d, 1 H, *J* = 3.0 Hz), 7.43-7.39 (m, 1 H), 7.30 (dt, 1 H, *J* = 9.0, 3.0 Hz), 7.11 (d, 1 H, *J* = 3.0 Hz), 6.49 (dd, 1 H, *J* = 3.0, 1.0 Hz), 4.03-3.97 (m, 1 H), 3.87 (t, 1 H, *J* = 6.0 Hz), 3.80-3.78 (m, 4 H).

**<sup>13</sup>C NMR (75 MHz, CDCl<sub>3</sub>)** δ 156.2 (q, *J* = 5.3 Hz), 134.3, 130.6, 130.4, 128.3, 123.9 (q, *J* = 274.5 Hz), 111.3, 109.9, 108.1, 101.5, 51.2 (q, *J* = 31.5 Hz), 39.6 (q, *J* = 3.0 Hz), 33.0.

**<sup>19</sup>F NMR (282 MHz, CDCl<sub>3</sub>)** δ -68.7 (s, 3 F).

**HRMS (EI)** [M+H]<sup>+</sup> calcd for C<sub>13</sub>H<sub>12</sub>F<sub>3</sub>N<sub>2</sub>O, 269.0902; found, 269.0908.

### 1-(4-((1H-1,2,4-triazol-1-yl)methyl)phenyl)-3-(trifluoromethyl)azetidin-2-one (3w)

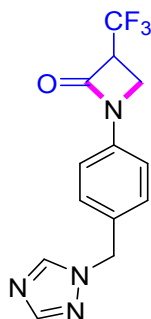

**<sup>1</sup>H NMR (300 MHz, CDCl<sub>3</sub>)** δ 7.99 (s, 1 H), 7.89 (s, 1 H), 7.32-7.28 (m, 2 H), 7.25-7.20 (m, 2 H), 5.25 (s, 2 H), 4.03-3.91 (m, 1 H), 3.80 (t, 1 H, *J* = 6.0 Hz), 3.71-3.68 (m, 1 H).

**<sup>13</sup>C NMR (75 MHz, CDCl<sub>3</sub>)** δ 156.5 (q, *J* = 4.5 Hz), 152.3, 143.5, 137.5, 131.7, 128.7, 123.4 (q, *J* = 275.3 Hz), 117.0, 53.0, 51.7 (q, *J* = 31.5 Hz), 39.5 (q, *J* = 3.2 Hz).

**<sup>19</sup>F NMR (282 MHz, CDCl<sub>3</sub>)** δ -68.4 (s, 3 F).

**HRMS (EI)** [M+H]<sup>+</sup> calcd for C<sub>13</sub>H<sub>12</sub>F<sub>3</sub>N<sub>4</sub>O, 297.0963; found, 297.0961.

**1,1'-(1,3-phenylene)bis(3-(trifluoromethyl)azetidin-2-one) (3x)**

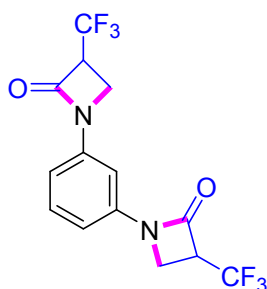

**<sup>1</sup>H NMR (300 MHz, CDCl<sub>3</sub>)**  $\delta$  7.32-7.27 (m, 2 H), 7.71-7.08 (m, 2 H), 4.01-3.91 (m, 2 H), 3.82 (t, *J* = 6.0 Hz, 2 H), 3.74-3.71 (m, 2 H).

**<sup>13</sup>C NMR (75 MHz, CDCl<sub>3</sub>)**  $\delta$  156.7 (d, *J* = 4.5 Hz), 138.2, 130.5, 128.2, 123.4 (q, *J* = 274.5 Hz), 112.9, 104.6, 51.7 (q, *J* = 30.0 Hz), 39.6 (q, *J* = 3.8 Hz).

**<sup>19</sup>F NMR (282 MHz, CDCl<sub>3</sub>)**  $\delta$  -68.4 (s, 6 F).

**HRMS (EI)** [M+H]<sup>+</sup> calcd for C<sub>14</sub>H<sub>11</sub>F<sub>6</sub>N<sub>2</sub>O<sub>2</sub>, 353.0725; found, 353.0722.

**1-(4-aminophenyl)-3-(trifluoromethyl)azetidin-2-one (3y)**

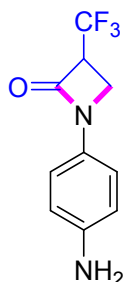

**<sup>1</sup>H NMR (300 MHz, CDCl<sub>3</sub>)**  $\delta$  7.18 (d, 2 H, *J* = 9.0 Hz), 6.68 (d, 2 H, *J* = 9.0 Hz), 4.03-3.92 (m, 1 H), 3.79 (t, 1 H, *J* = 6.0 Hz), 3.71-3.68 (m, 3 H).

**<sup>13</sup>C NMR (75 MHz, CDCl<sub>3</sub>)**  $\delta$  158.8 (q, *J* = 3.8 Hz), 143.9, 127.9, 124.0 (q, *J* = 234.0 Hz), 118.0, 115.5, 51.3 (q, *J* = 23.3 Hz), 39.4 (q, *J* = 3.8 Hz).

**<sup>19</sup>F NMR (282 MHz, CDCl<sub>3</sub>)**  $\delta$  -68.5 (s, 3 F).

**HRMS (EI)** [M+H]<sup>+</sup> calcd for C<sub>17</sub>H<sub>7</sub>F<sub>2</sub>N<sub>2</sub>O, 642.0349; found, 642.0342.



### N-(4-methoxyphenyl)methacrylamide ( 8 )

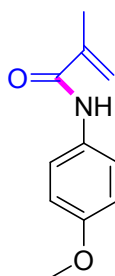

**<sup>1</sup>H NMR (300 MHz, CDCl<sub>3</sub>)**  $\delta$  7.50 (s, 1 H), 7.38 (d, 2 H,  $J$  = 3.0 Hz), 6.78 (d, 2 H,  $J$  = 3.0 Hz), 5.69 (t, 1 H,  $J$  = 1.0 Hz), 5.35-5.33 (m, 1 H), 3.71 (s, 3 H), 1.96 (q, 1 H,  $J$  = 1.0 Hz).

**<sup>13</sup>C NMR (400 MHz NMR, 100 MHz, CDCl<sub>3</sub>)**  $\delta$  166.6, 156.9, 140.8, 132.0, 122.0, 118.8, 114.1, 55.5, 20.7.

**HRMS (EI)** [M+H]<sup>+</sup> calcd for C<sub>11</sub>H<sub>14</sub>NO<sub>2</sub>, 192.1025; found, 192.1026.

### 1-(4-methoxyphenyl)-3-(perfluoroethyl)azetidin-2-one (10a)

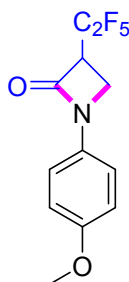

**<sup>1</sup>H NMR (300 MHz, CDCl<sub>3</sub>)**  $\delta$  7.23 (d, 2 H,  $J$  = 9.0 Hz), 6.82 (d, 2 H,  $J$  = 9.0 Hz), 3.98-3.85 (m, 1 H), 3.76-3.67 (m, 5 H).

**<sup>13</sup>C NMR (75 MHz, CDCl<sub>3</sub>)**  $\delta$  158.1, 155.6 (t,  $J$  = 5.3 Hz), 130.9, 120.5 (t,  $J$  = 35.3 Hz), 117.9, 114.5, 112.6 (t,  $J$  = 30.8 Hz), 109.2 (t,  $J$  = 39.8 Hz), 55.5, 49.3 (t,  $J$  = 24.0 Hz), 38.9 (t,  $J$  = 4.5 Hz).

**<sup>19</sup>F NMR (282 MHz, CDCl<sub>3</sub>)**  $\delta$  -84.2 (s, 3 F), -121.4 (t, 2 F,  $J$  = 16.3 Hz).

**HRMS (EI)** [M+H]<sup>+</sup> calcd for C<sub>12</sub>H<sub>11</sub>F<sub>5</sub>NO<sub>2</sub>, 296.0710; found, 296.0702.

### 1-(4-(methylthio)phenyl)-3-(perfluoroethyl)azetidin-2-one (10b)

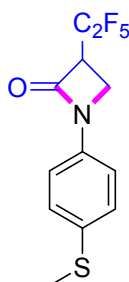

**<sup>1</sup>H NMR (300 MHz, *d*<sub>6</sub>-acetone)**  $\delta$  7.44-7.40 (m, 2 H), 7.37-7.33 (m, 2 H), 4.58-4.42 (m, 1 H), 4.12 (t, 1 H, *J* = 9.0 Hz), 3.97-3.94 (m, 1 H), 2.51 (s, 3 H).

**<sup>13</sup>C NMR (75 MHz, *d*<sub>6</sub>-acetone)**  $\delta$  156.2 (t, *J* = 5.3 Hz), 135.4, 134.4, 127.9, 120.7 (t, *J* = 36.0 Hz), 117.2, 113.5 (t, *J* = 26.3 Hz), 110.2 (t, *J* = 57.8 Hz), 49.2 (t, *J* = 23.3 Hz), 38.9 (t, *J* = 13.5 Hz), 14.6.

**<sup>19</sup>F NMR (282 MHz, *d*<sub>6</sub>-acetone)**  $\delta$  -85.3 (s, 3 F), -121.7 (dd, *J* = 16.3, 13.6 Hz).

**HRMS (EI)** [M+H]<sup>+</sup> calcd for C<sub>12</sub>H<sub>11</sub>F<sub>5</sub>NOS, 312.0482; found, 312.0480.

### (*Z,E*)-1-(4-(methylthio)phenyl)-3-(perfluoroethylidene)azetidin-2-one

(11, 11')

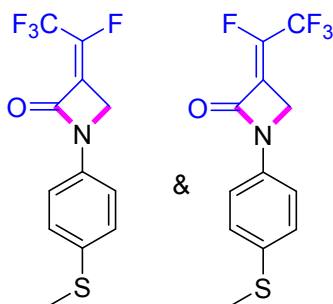

**<sup>1</sup>H NMR (300 MHz, *d*<sub>6</sub>-acetone)**  $\delta$  7.46-7.42 (m, 2 H), 7.38-7.33 (m, 2 H), 4.59-4.57 (m, 1.6 H), 4.55-4.54 (m, 0.4 H), 2.51 (s, 3 H).

**<sup>13</sup>C NMR (75 MHz, *d*<sub>6</sub>-acetone)**  $\delta$  153.3 (d, *J* = 4.5 Hz), 135.2, 134.9, 127.5, 124.0 (d, *J* = 11.3 Hz), 120.0 (d, *J* = 41.3 Hz), 117.2, 117.1, 116.4 (d, *J* = 40.5 Hz), 44.4-44.3 (m), 43.9 (d, *J* = 3.8 Hz), 15.1.

**<sup>19</sup>F NMR (282 MHz, *d*<sub>6</sub>-acetone)**  $\delta$  -70.9 (s, 0.7 H), -72.1 (s, 3.0 F), -130.2- -130.3 (m, 1 F), -133.6- -134.1 (m, 0.22 F).

**HRMS (EI)** [M+H]<sup>+</sup> calcd for C<sub>12</sub>H<sub>10</sub>F<sub>4</sub>NOS, 292.0419; found, 292.0411.

### 1-(4-ethoxyphenyl)-3-(perfluoroethyl)azetidin-2-one (10c)

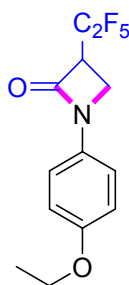

**<sup>1</sup>H NMR (300 MHz, CDCl<sub>3</sub>)**  $\delta$  7.31 (d, 2 H,  $J$  = 6.0 Hz), 6.90 (d, 2 H,  $J$  = 9.0 Hz), 4.08-3.94 (m, 3 H), 3.85-3.77 (m, 2 H), 1.43 (t, 3 H,  $J$  = 7.5 Hz).

**<sup>13</sup>C NMR (75 MHz, CDCl<sub>3</sub>)**  $\delta$  156.2, 155.6 (t,  $J$  = 5.3 Hz), 131.4, 124.2 (t,  $J$  = 40.5 Hz), 120.5 (t,  $J$  = 35.3 Hz), 117.8, 115.1, 112.8 (t,  $J$  = 39.0 Hz), 109.5 (d,  $J$  = 38.3 Hz), 63.8, 49.3 (t,  $J$  = 24.0 Hz), 38.9 (t,  $J$  = 4.5 Hz), 14.8.

**<sup>19</sup>F NMR (282 MHz, CDCl<sub>3</sub>)**  $\delta$  -84.4 (s, 3 F), -121.4 (dd,  $J$  = 16.3, 13.6 Hz).

**HRMS (EI)** [M+H]<sup>+</sup> calcd for C<sub>13</sub>H<sub>13</sub>F<sub>5</sub>NO<sub>2</sub>, 310.0866; found, 310.0861.

### 4-(2-oxo-3-(perfluoroethyl)azetidin-1-yl)benzonitrile (10d)

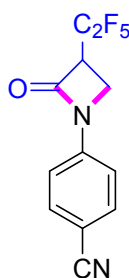

**<sup>1</sup>H NMR (300 MHz, CDCl<sub>3</sub>)**  $\delta$  7.68 (d, 2 H,  $J$  = 9.0 Hz), 7.45 (d, 2 H,  $J$  = 9.0 Hz), 4.16-4.05 (m, 1 H), 3.96-3.86 (m, 2 H).

**<sup>13</sup>C NMR (75 MHz, CDCl<sub>3</sub>)**  $\delta$  140.5, 133.8, 118.4, 117.0, 108.3, 50.0 (t,  $J$  = 24.4 Hz), 39.3 (t,  $J$  = 4.1 Hz).

**<sup>19</sup>F NMR (282 MHz, CDCl<sub>3</sub>)**  $\delta$  -84.2 (s, 3 F), -121.1 (d, 2 F,  $J$  = 13.6 Hz).

**HRMS (EI)** [M+H]<sup>+</sup> calcd for C<sub>12</sub>H<sub>8</sub>F<sub>5</sub>N<sub>2</sub>O, 291.0557; found, 291.0548.

### 1-(3-methoxyphenyl)-3-(perfluoroethyl)azetidin-2-one (10e)

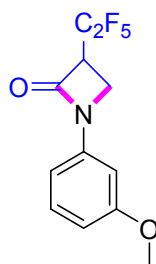

**<sup>1</sup>H NMR (400 MHz, CDCl<sub>3</sub>)**  $\delta$  7.83-7.73 (m, 3 H), 7.44 (t, 1 H, *J* = 10.4 Hz), 4.12-4.06 (m, 1 H), 4.00-3.85 (m, 5 H).

**<sup>13</sup>C NMR (100 MHz, CDCl<sub>3</sub>)**  $\delta$  163.3, 156.4 (t, *J* = 2.1 Hz), 137.5, 131.4, 129.7, 126.0, 121.6, 116.6, 52.5, 49.6 (t, *J* = 32.3 Hz), 39.2 (t, *J* = 5.2 Hz).

**<sup>19</sup>F NMR (382 MHz, CDCl<sub>3</sub>)**  $\delta$  -84.3 (s, 3 F), -121.3 (dd, 2 F, *J* = 16.3, 13.6 Hz).

**HRMS (EI)** [M+H]<sup>+</sup> calcd for C<sub>12</sub>H<sub>11</sub>F<sub>5</sub>NO<sub>2</sub>, 296.0710; found, 296.0701.

### methyl 3-(2-oxo-3-(perfluoroethyl)azetidin-1-yl)benzoate (10f)

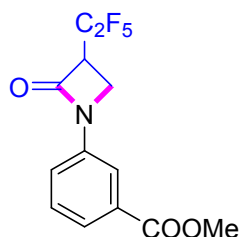

**<sup>1</sup>H NMR (300 MHz, CDCl<sub>3</sub>)**  $\delta$  7.78-7.67 (m, 3 H), 7.38 (td, 1 H, *J* = 9.0, 3.0 Hz), 4.06-3.92 (m, 1 H), 3.88-3.78 (m, 5 H).

**<sup>13</sup>C NMR (75 MHz, CDCl<sub>3</sub>)**  $\delta$  167.9, 156.3 (t, *J* = 6.0 Hz), 137.4, 131.3, 129.6, 126.0, 121.5, 120.5 (t, *J* = 35.3 Hz), 116.6, 112.7 (d, *J* = 39.0 Hz), 109.3 (d, *J* = 45.8 Hz), 52.4, 49.5 (t, *J* = 24.0 Hz), 39.1 (t, *J* = 5.3 Hz).

**<sup>19</sup>F NMR (282 MHz, CDCl<sub>3</sub>)**  $\delta$  -84.7 (s, 3 F), -121.5 (dd, 2 F, *J* = 13.6, 5.4 Hz).

**HRMS (EI)** [M+H]<sup>+</sup> calcd for C<sub>13</sub>H<sub>11</sub>F<sub>5</sub>NO<sub>3</sub>, 324.0659; found, 324.0648.

### 1-(2-methoxyphenyl)-3-(perfluoroethyl)azetidin-2-one (10g)

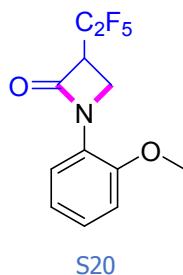

**<sup>1</sup>H NMR (300 MHz, CDCl<sub>3</sub>)** δ 7.89 (dd, 1 H, *J* = 2.7, 0.5 Hz), 7.17-7.10 (m, 1 H), 6.98-6.90 (m, 2 H), 4.17-3.92 (m, 3 H), 3.84 (s, 3 H).

**<sup>13</sup>C NMR (75 MHz, CDCl<sub>3</sub>)** δ 157.8, 151.4, 126.4, 126.0, 122.4, 121.2, 111.9, 55.7, 51.0 (t, *J* = 22.5 Hz), 43.8.

**<sup>19</sup>F NMR (282 MHz, CDCl<sub>3</sub>)** δ -84.4 (s, 3 F), -121.5 (dd, 2 F, *J* = 13.6, 5.4 Hz).

**HRMS (EI)** [M+H]<sup>+</sup> calcd for C<sub>12</sub>H<sub>11</sub>F<sub>5</sub>NO<sub>2</sub>, 296.0710; found, 296.0701.

### 1-(3,4-dimethylphenyl)-3-(perfluoroethyl)azetid-2-one (10h)

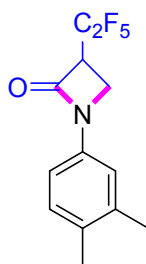

**<sup>1</sup>H NMR (400 MHz, CDCl<sub>3</sub>)** δ 7.18 (d, 2 H, *J* = 2.8 Hz), 7.13-7.04 (m, 2 H), 4.05-3.93 (m, 1 H), 3.84-3.78 (m, 2 H), 2.27 (s, 3 H), 2.24 (s, 3 H).

**<sup>13</sup>C NMR (100 MHz, CDCl<sub>3</sub>)** δ 138.1, 135.4, 133.7, 130.4, 118.0, 114.0, 49.4 (t, *J* = 31.5 Hz), 39.0, 20.1, 19.5.

**<sup>19</sup>F NMR (375 MHz, CDCl<sub>3</sub>)** δ -84.3 (s, 3 F), -121.4 (dd, *J* = 22.1, 19.9 Hz).

**HRMS (EI)** [M+H]<sup>+</sup> calcd for C<sub>13</sub>H<sub>13</sub>F<sub>5</sub>NO, 294.0917; found, 294.0912.

### 1-(4-methyl-3-((4-(pyridin-2-yl)pyrimidin-2-yl)amino)phenyl)-3-(trifluoromethyl)azetid-2-one (13)

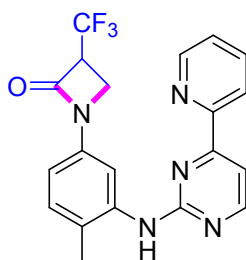

**<sup>1</sup>H NMR (300 MHz, CDCl<sub>3</sub>)** δ 9.28 (dd, 1 H, *J* = 6.0, 3.0 Hz), 8.75 (dd, 1 H, *J* = 6.0, 3.0 Hz), 8.55- 8.54 (m, 1 H), 8.53- 8.50 (m, 1 H), 7.25 (d, 1 H, *J* = 3.0 Hz), 7.21 (s, 1 H), 7.11 (s, 1 H), 7.00 (dd, 1 H, *J* = 6.0, 3.0 Hz), 4.11-3.99 (m, 1 H), 3.90 (t, 1 H, *J* = 6.0 Hz), 3.81-3.78 (m, 1 H), 2.37 (s, 3 H).

**<sup>13</sup>C NMR (75 MHz, CDCl<sub>3</sub>)** δ 163.6, 160.3, 159.2, 156.3 (q, *J* = 4.5 Hz), 151.7, 148.5, 138.2, 135.6, 134.4, 132.6, 128.2, 125.5, 124.9, 123.8, 123.7, 122.3, 112.4, 108.9, 108.7, 51.4 (q, *J* = 31.5 Hz), 39.5 (q, *J* = 3.8 Hz), 17.1.

**<sup>19</sup>F NMR (282 MHz, CDCl<sub>3</sub>)** δ -68.5 (s, 3 F).

**HRMS (EI)** [M+H]<sup>+</sup> calcd for C<sub>21</sub>H<sub>21</sub>F<sub>3</sub>N<sub>5</sub>O, 416.1698; found, 416.1692.

**1-((9S,13S,14S)-13-methyl-17-oxo-7,8,9,11,12,13,14,15,16,17-decahydro-6H-cyclopenta[a]phenanthren-3-yl)-3-(trifluoromethyl)azetidin-2-one (15)**

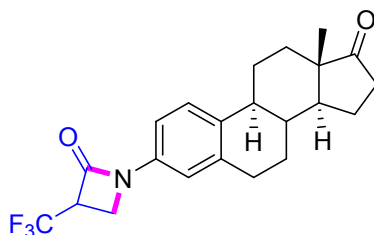

**<sup>1</sup>H NMR (400 MHz, *d*<sub>6</sub>-acetone)** δ 7.18 (d, 1 H, *J* = 8.4 Hz), 7.08-7.05 (m, 1 H), 7.01 (s, 1 H), 4.30- 4.23 (m, 1 H), 3.90 (t, 1 H, *J* = 6.0 Hz), 3.71-3.68 (m, 1 H), 2.76-2.75 (m, 2 H), 2.33-2.25 (m, 2 H), 2.10 (t, 1 H, *J* = 10.0 Hz), 1.95-1.87 (m, 3 H), 1.72-1.69 (m, 1 H), 1.53-1.30 (m, 6 H), 0.74 (s, 3 H).

**<sup>13</sup>C NMR (100 MHz, *d*<sub>6</sub>-acetone)** δ 218.5, 156.5 (q, *J* = 4.6 Hz), 137.7, 136.4, 135.7, 126.1, 124.4 (q, *J* = 273.9 Hz), 116.5 (d, *J* = 2.9 Hz), 113.9 (d, *J* = 3.2 Hz), 51.2 (q, *J* = 30.0 Hz), 50.2, 47.5, 44.1, 39.2, 38.1, 35.2, 31.7, 29.2, 26.2, 25.6, 21.2, 13.2.

**<sup>19</sup>F NMR (282 MHz, *d*<sub>6</sub>-acetone)** δ -69.2 (s, 3 F).

**HRMS (EI)** [M+H]<sup>+</sup> calcd for C<sub>22</sub>H<sub>25</sub>F<sub>3</sub>NO<sub>2</sub>, 392.1837; found, 392.1831.

**methyl 3,3,3-trifluoro-2-(((4-(methylthio)phenyl)amino)methyl)propanoate (16)**

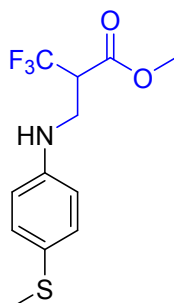

**<sup>1</sup>H NMR (400 MHz, *d*<sub>6</sub>-acetone)** δ 7.05 (d, 2 H, *J* = 2.2 Hz), 6.55 (d, 2 H, *J* = 2.1 Hz), 5.17 (s, 1 H), 3.67-3.53 (m, 6 H), 2.24 (s, 3 H).

**<sup>13</sup>C NMR (100 MHz, *d*<sub>6</sub>-acetone)** δ 166.6, 146.3, 130.1, 124.7 (t, *J* = 116.0 Hz), 113.4, 52.2, 49.3 (q, *J* = 25.5 Hz), 40.5 (q, *J* = 2.9 Hz), 17.8.

**<sup>19</sup>F NMR (282 MHz, *d*<sub>6</sub>-acetone)** δ -67.7 (s, 3 F).

**HRMS (EI)** [M+H]<sup>+</sup> calcd for C<sub>12</sub>H<sub>15</sub>F<sub>3</sub>NO<sub>2</sub>S, 294.0776; found, 294.0768.

**3,3,3-trifluoro-2-(((4-(methylthio)phenyl)amino)methyl)propan-1-ol (17)**

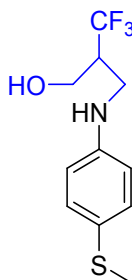

**<sup>1</sup>H NMR (300 MHz, CDCl<sub>3</sub>)** δ 7.16 (d, 2 H, *J* = 9.0 Hz), 6.55 (d, 2 H, *J* = 9.0 Hz), 3.91-3.78 (m, 2 H), 3.50-3.43 (m, 2 H), 2.57-2.50 (m, 1 H), 2.34 (s, 3 H).

**<sup>13</sup>C NMR (400 MHz NMR, 100 MHz, CDCl<sub>3</sub>)** δ 144.8, 131.0, 127.0, 126.8 (q, *J* = 131.2 Hz), 114.5, 58.9 (q, *J* = 3.0 Hz), 44.3 (q, *J* = 23.4 Hz), 40.8, 18.6.

**<sup>19</sup>F NMR (282 MHz, CDCl<sub>3</sub>)** δ -68.1 (s, 3 F).

**HRMS (EI)** [M+H]<sup>+</sup> calcd for C<sub>11</sub>H<sub>15</sub>F<sub>3</sub>NOS, 266.0826; found, 266.0820.

# 5 Copies of the NMR spectra of products

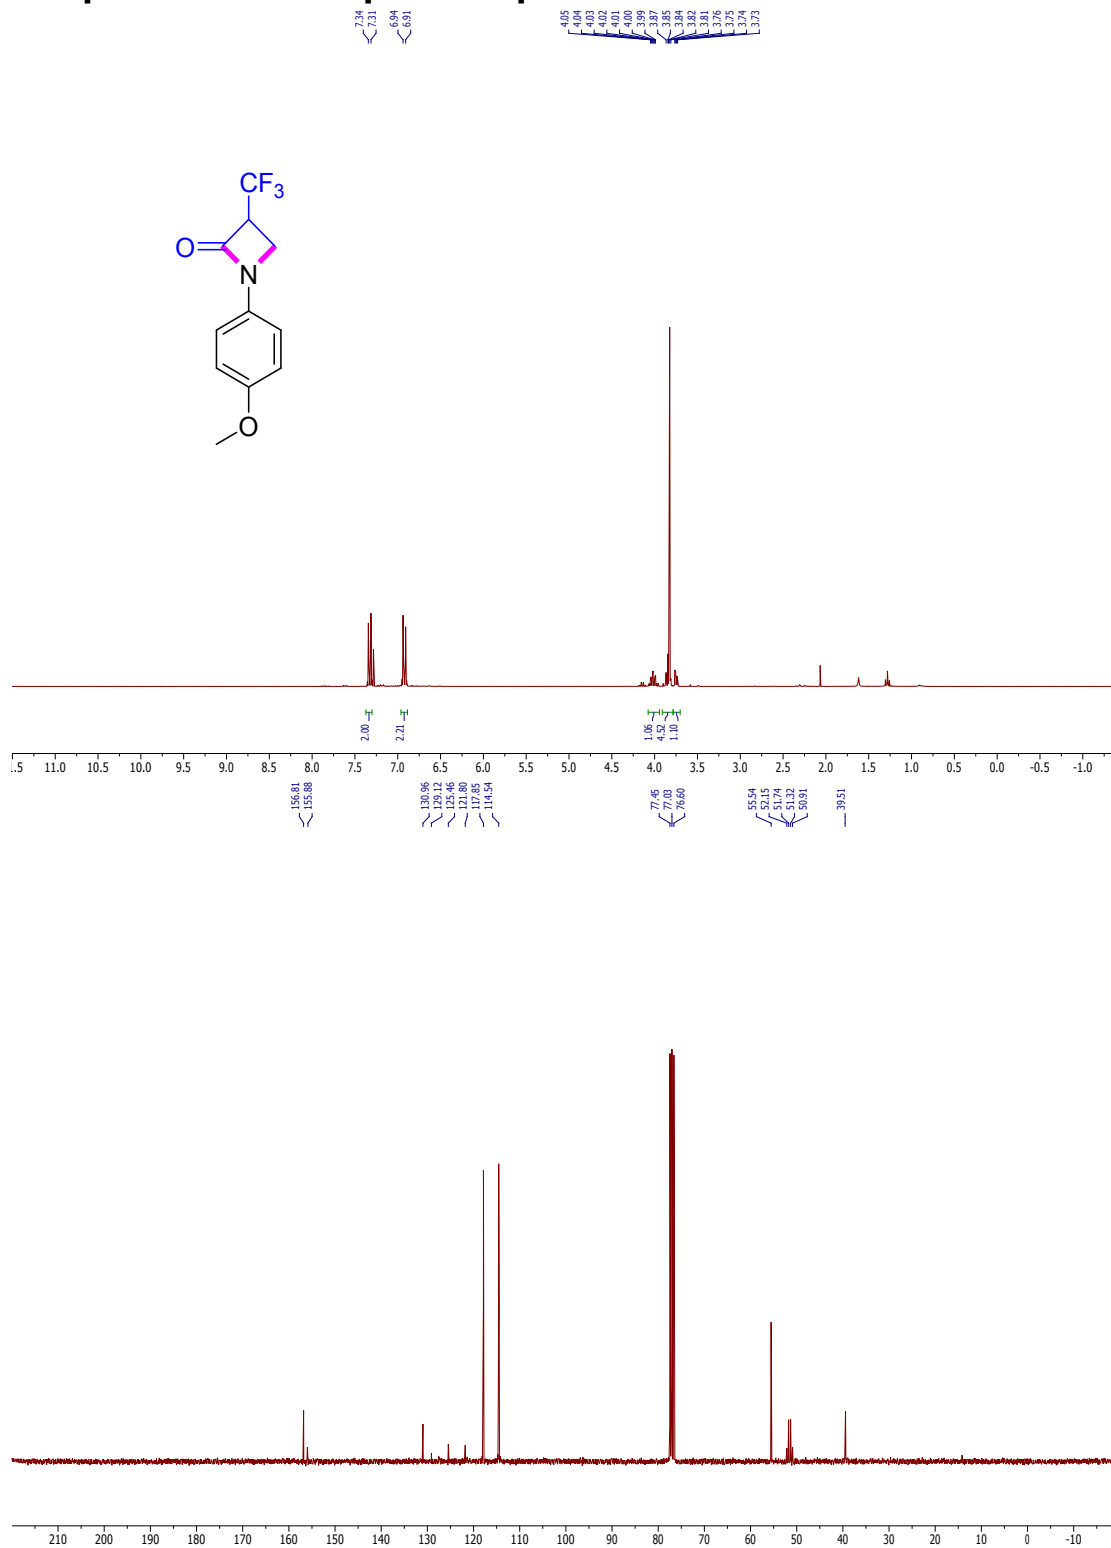



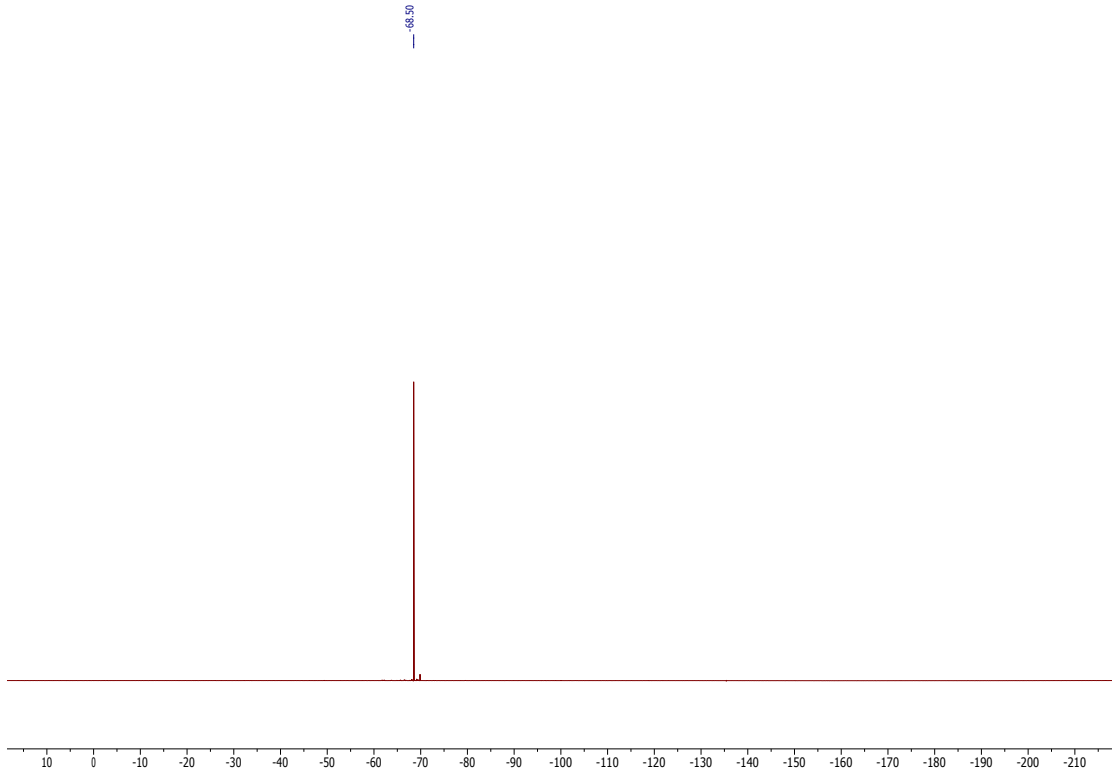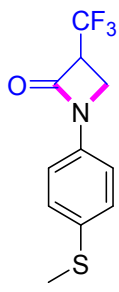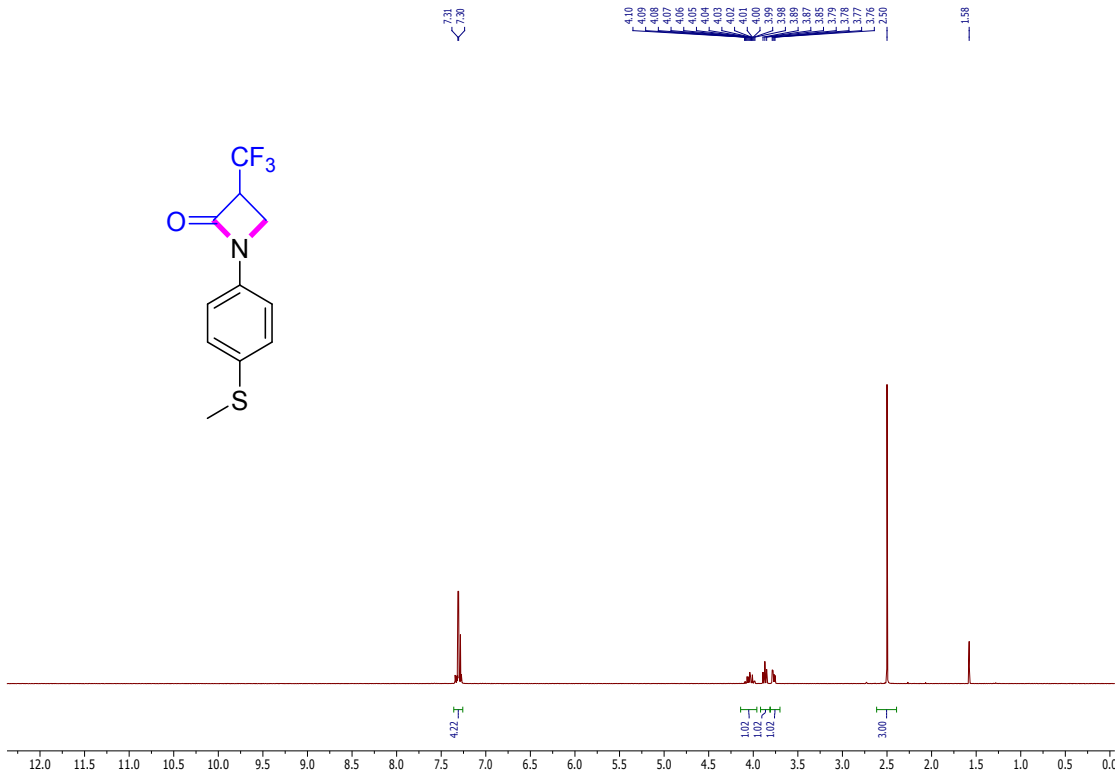

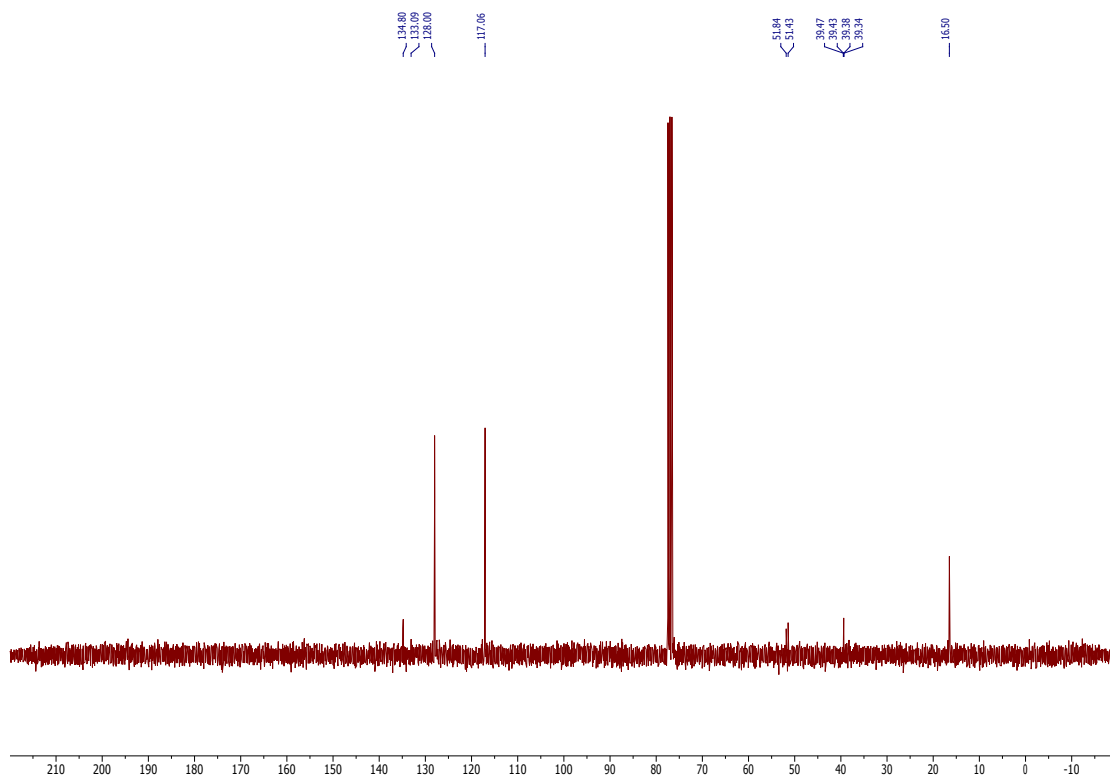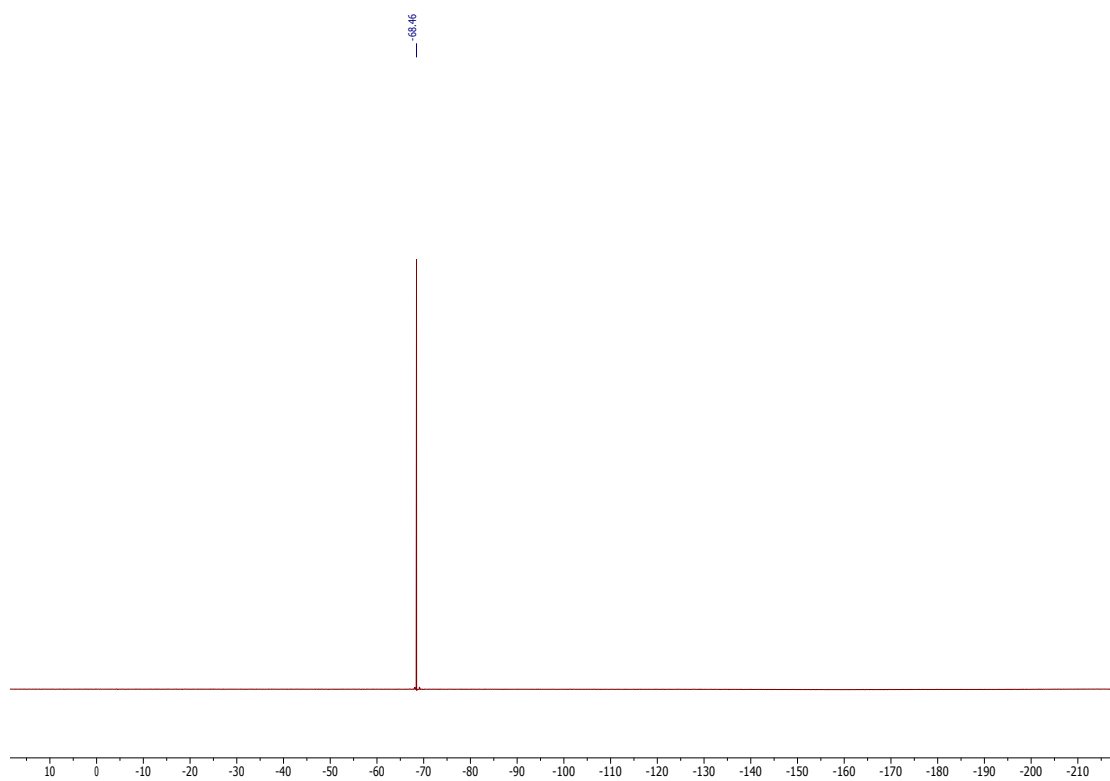

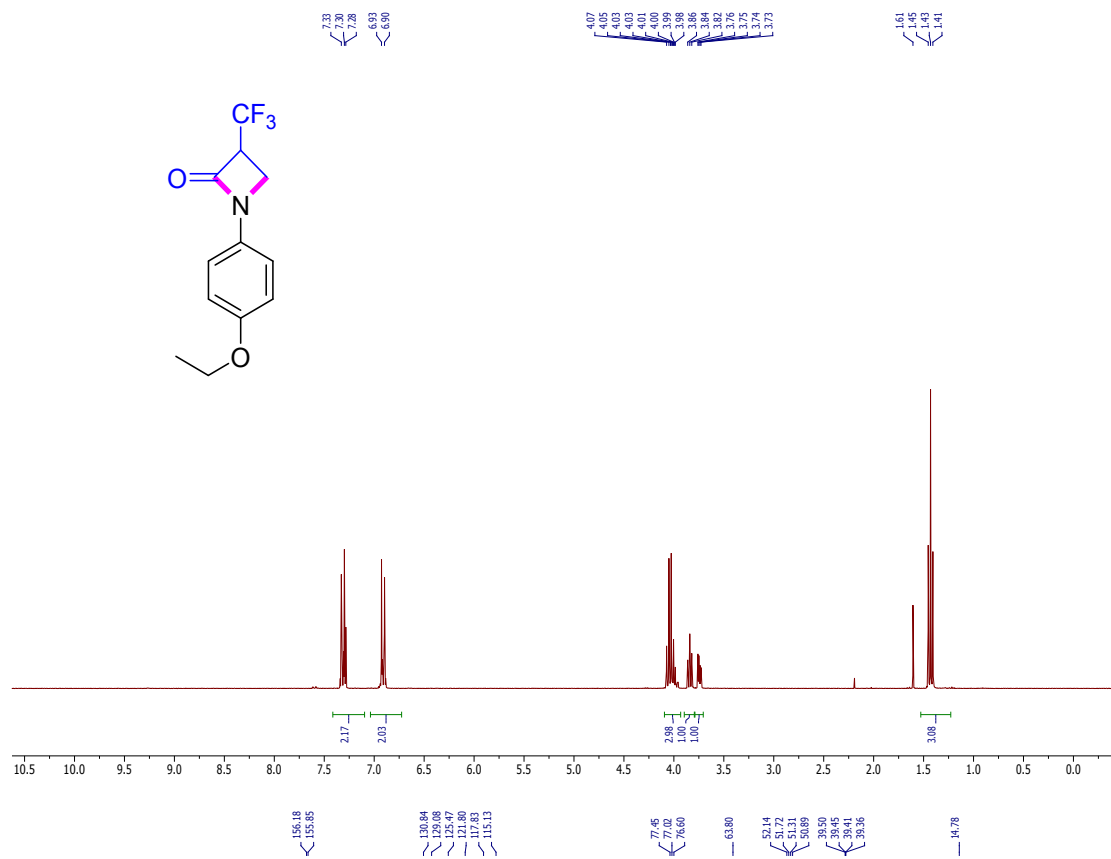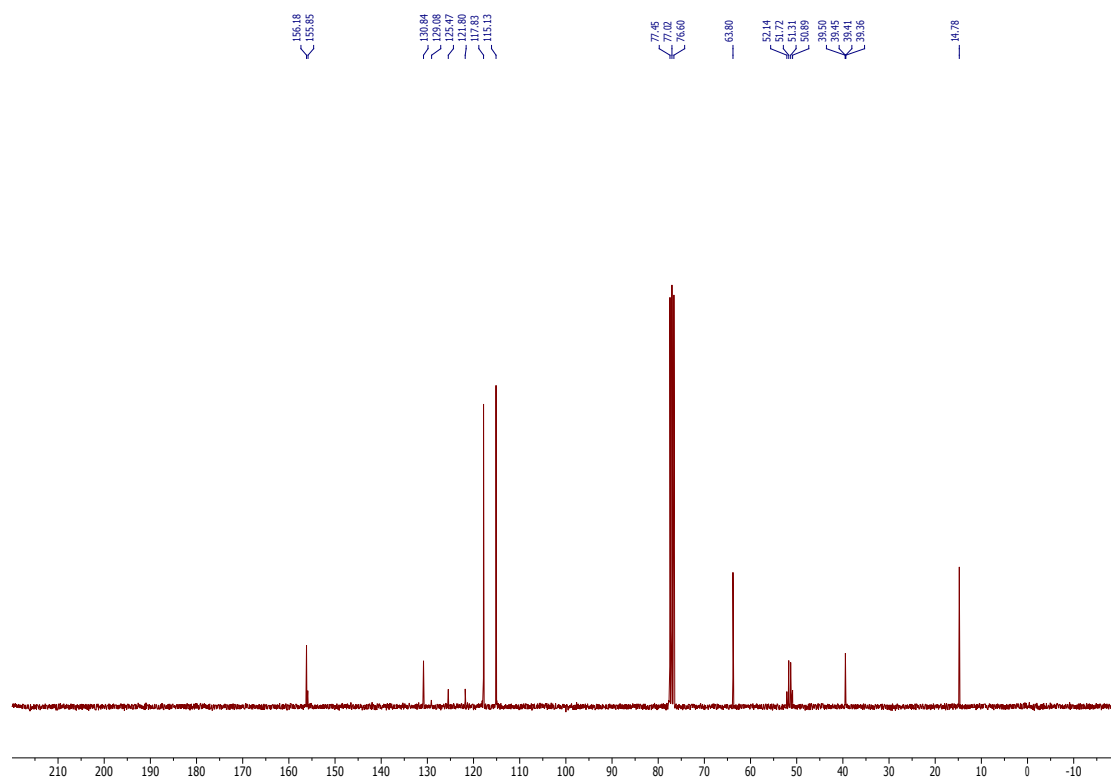

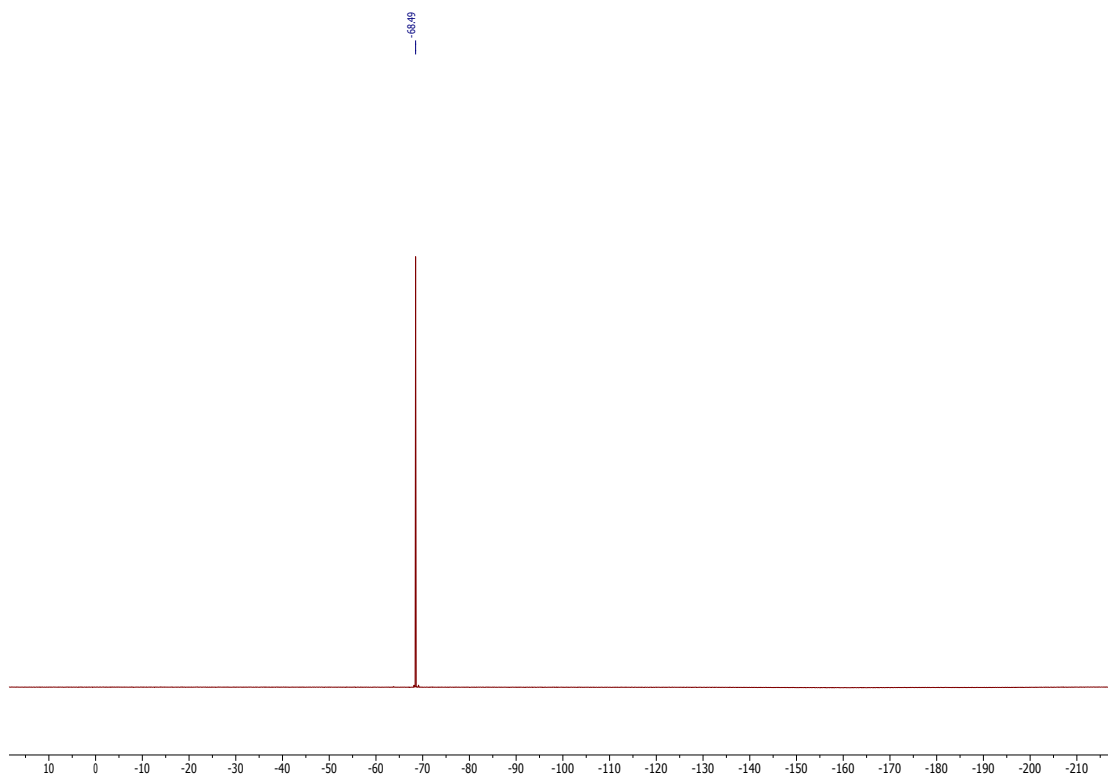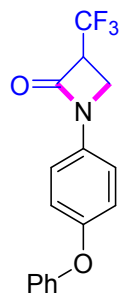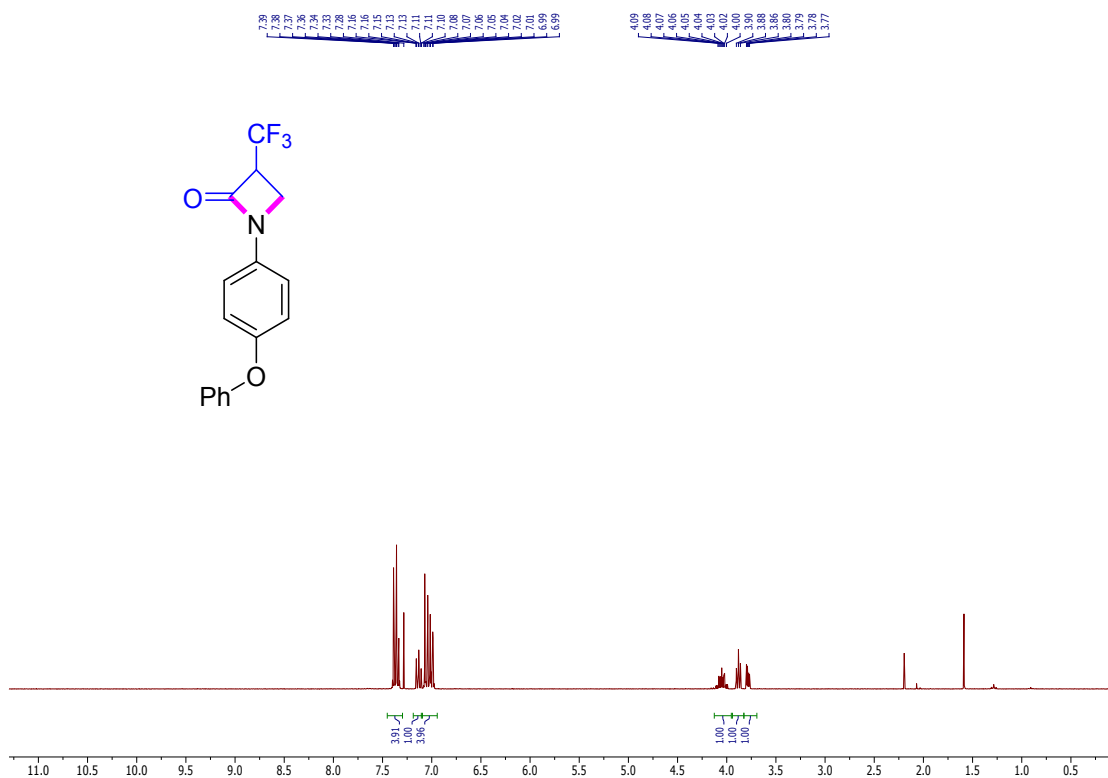

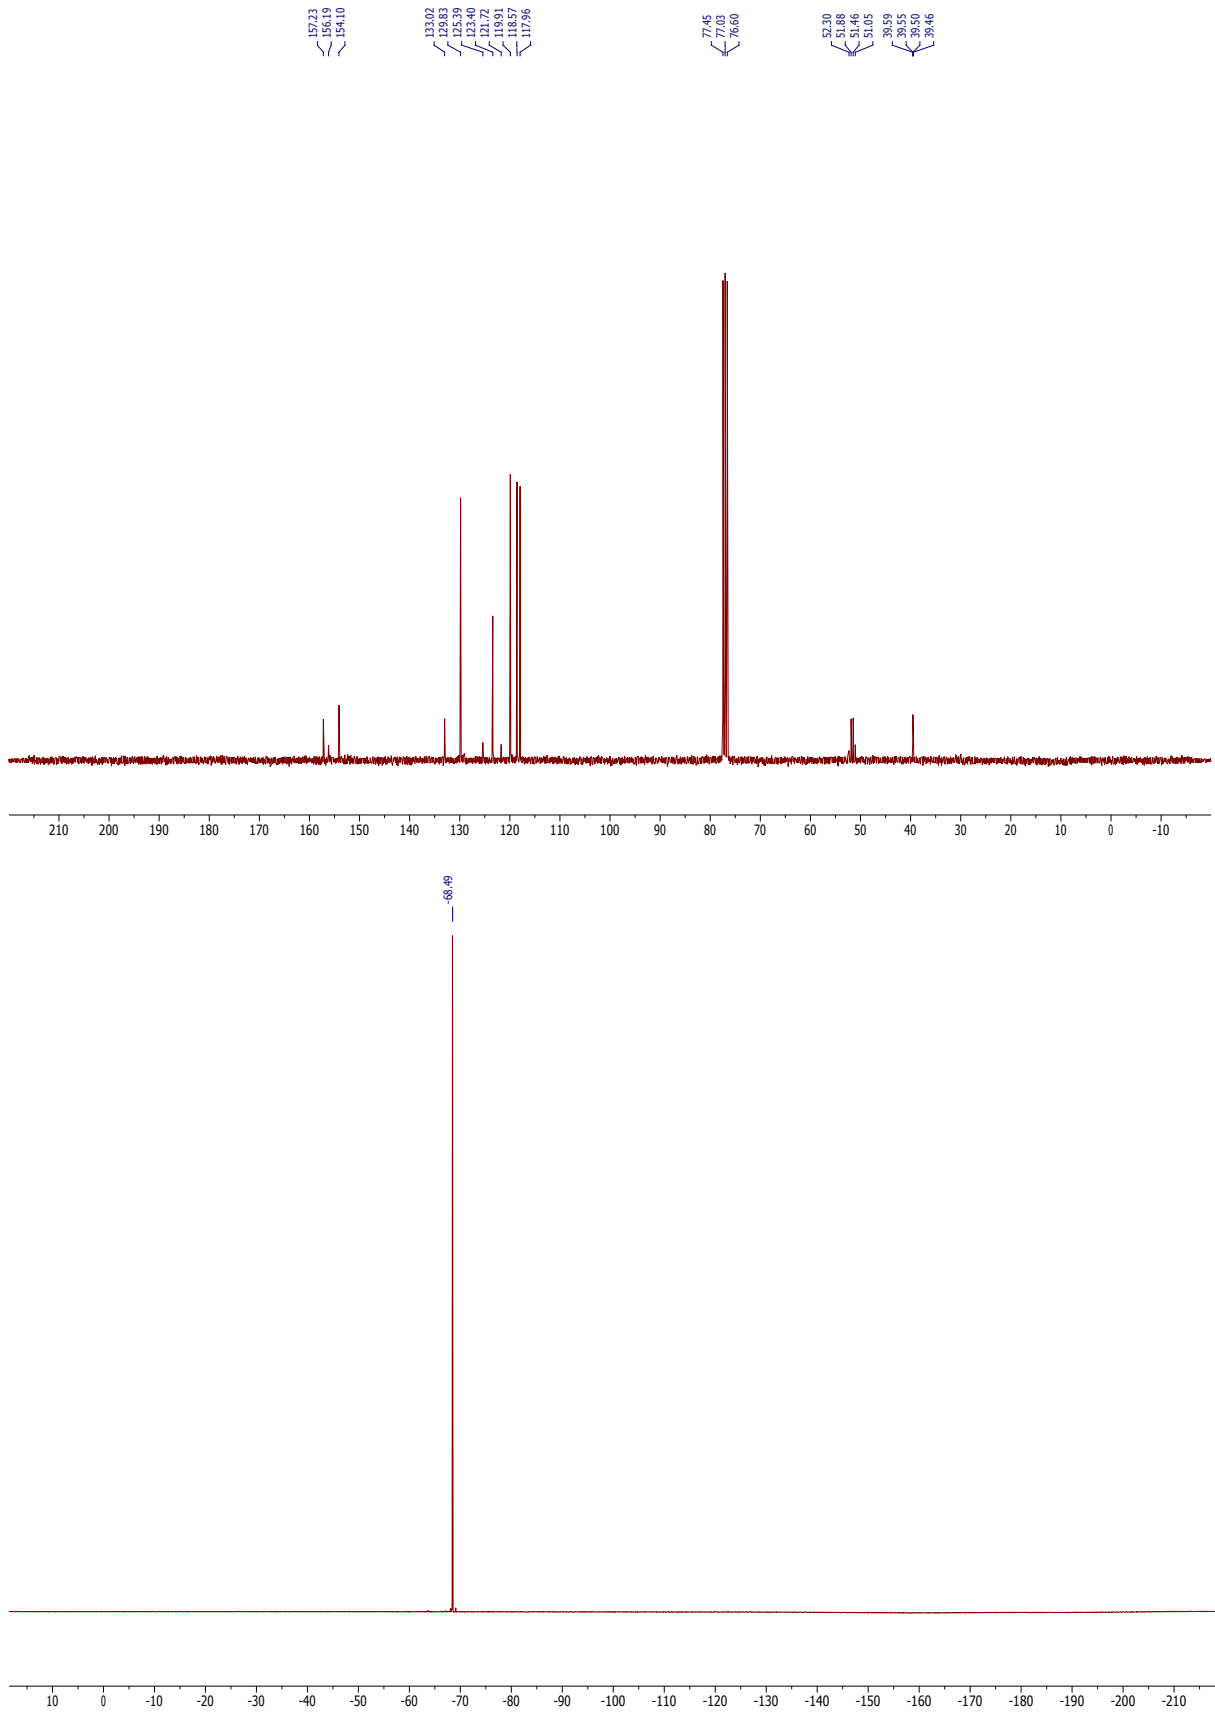

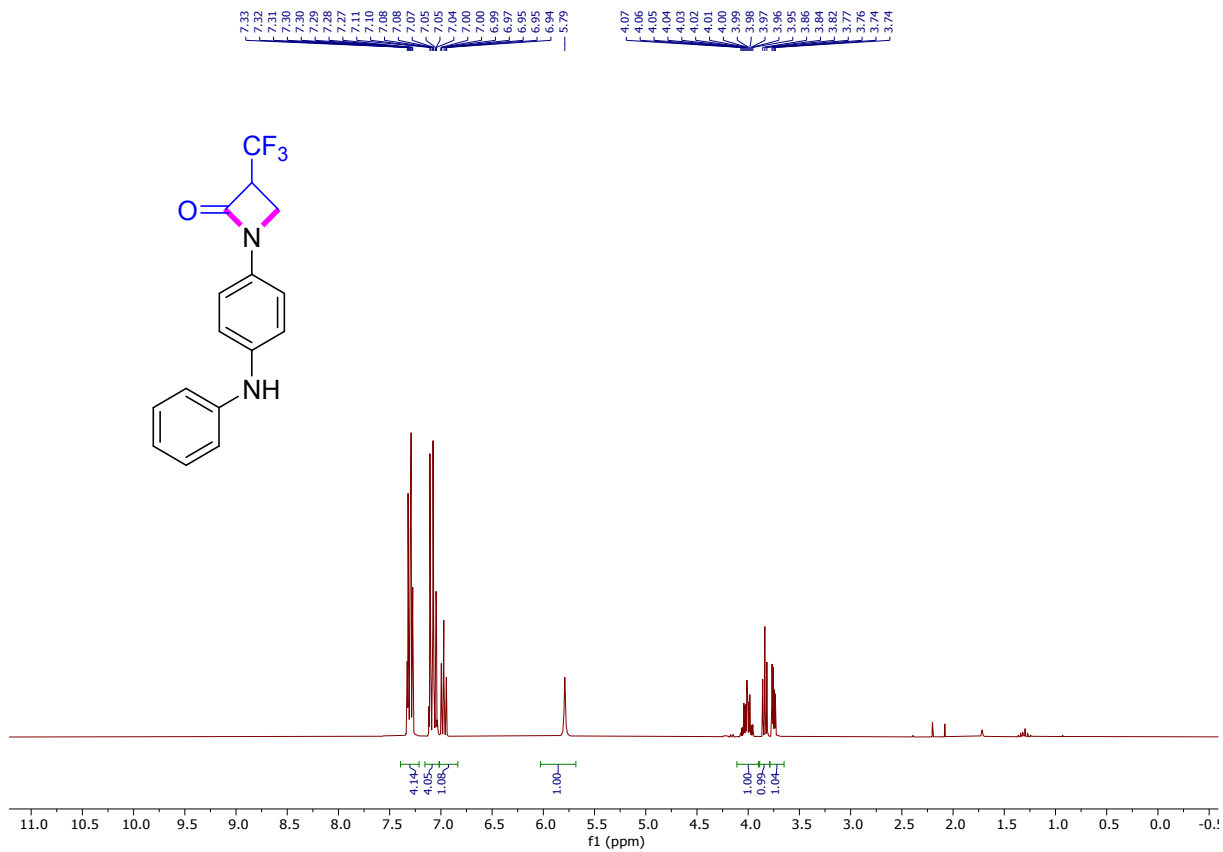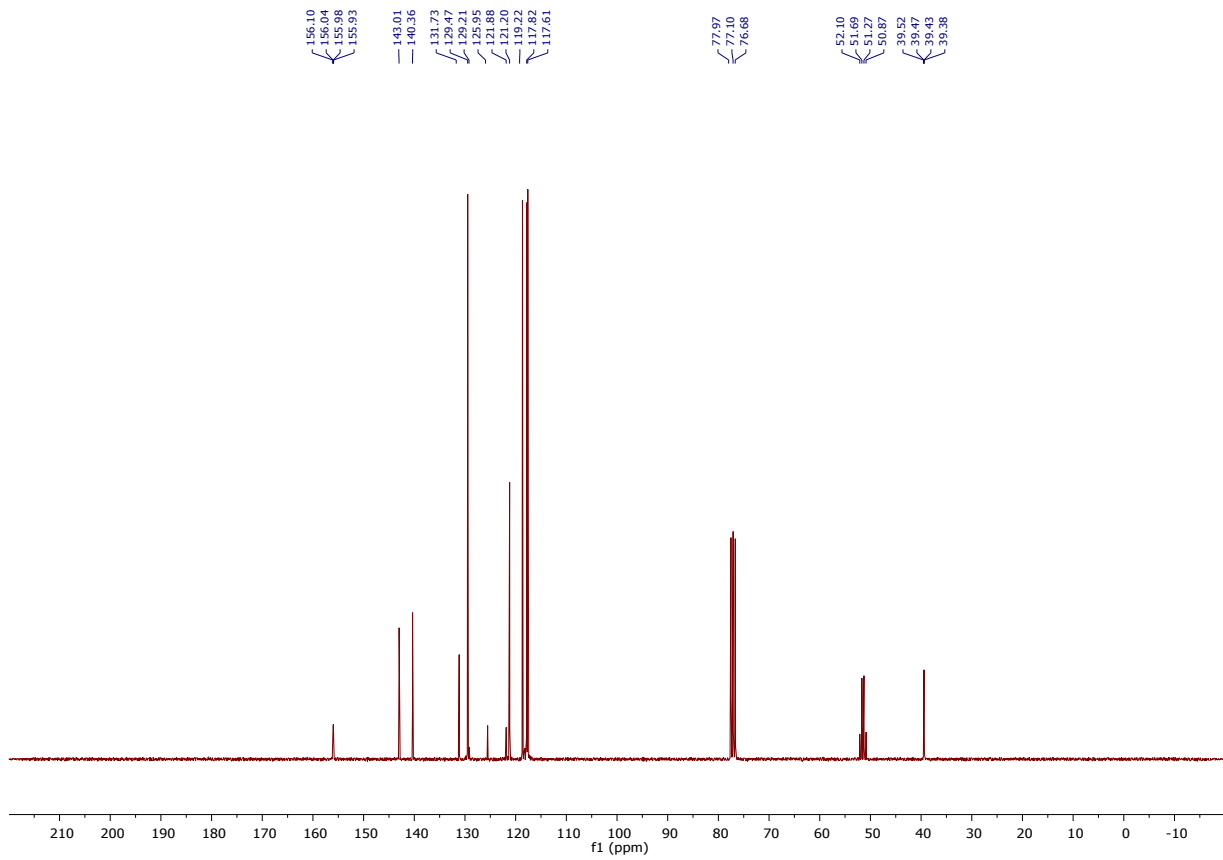

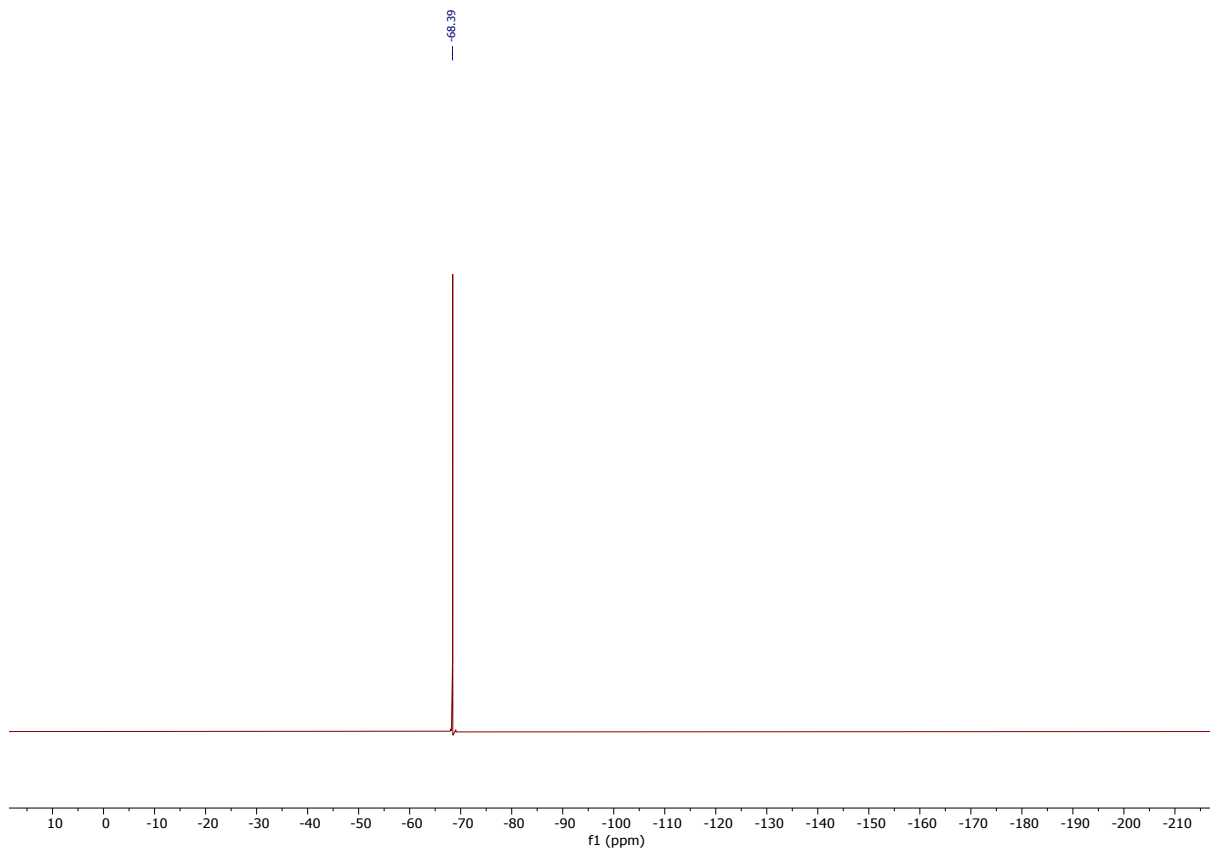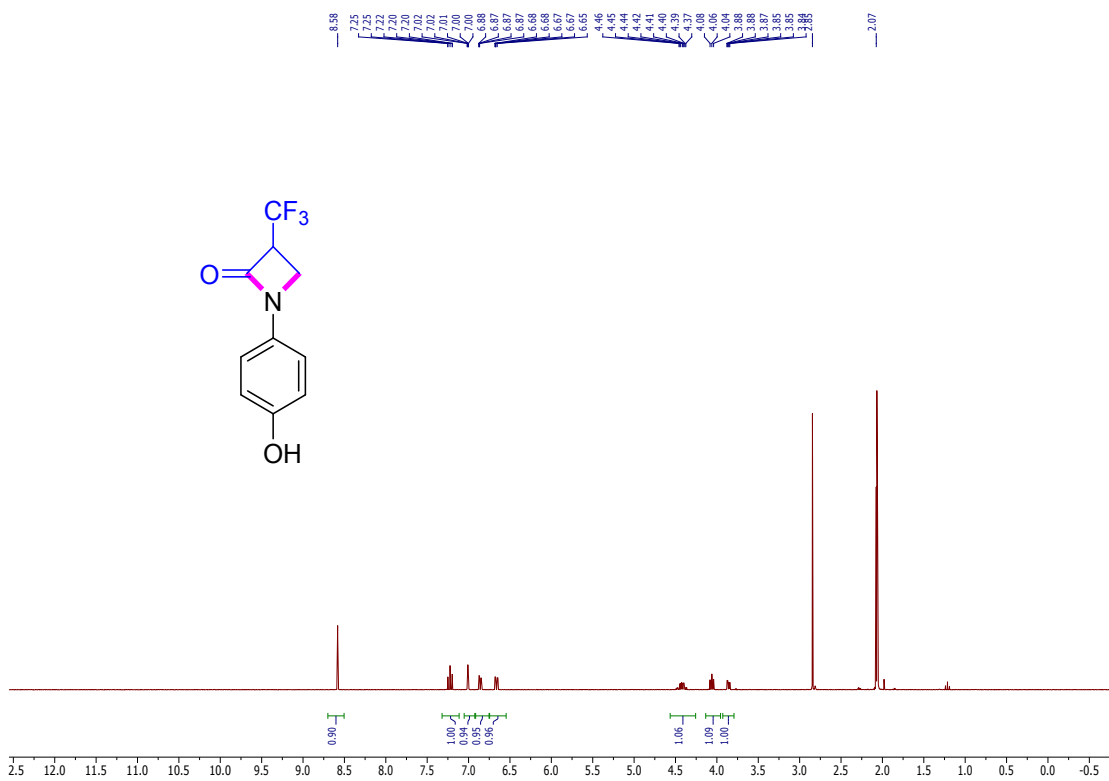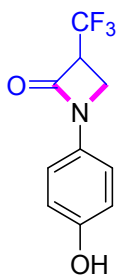

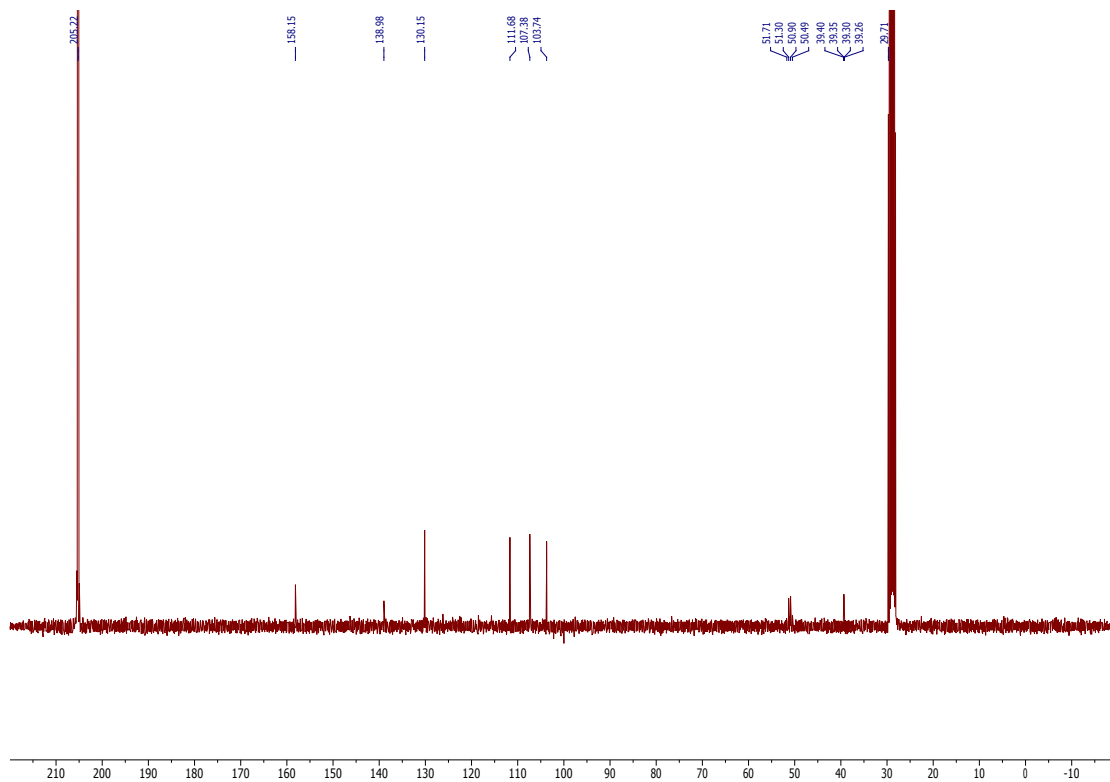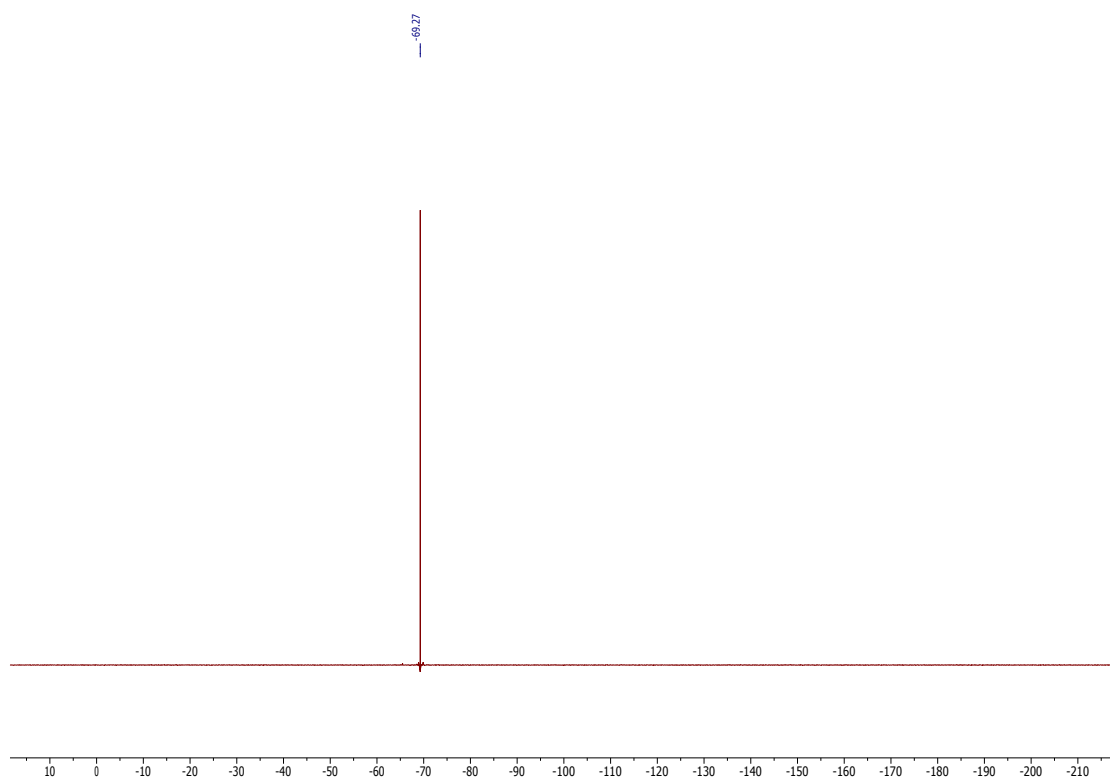



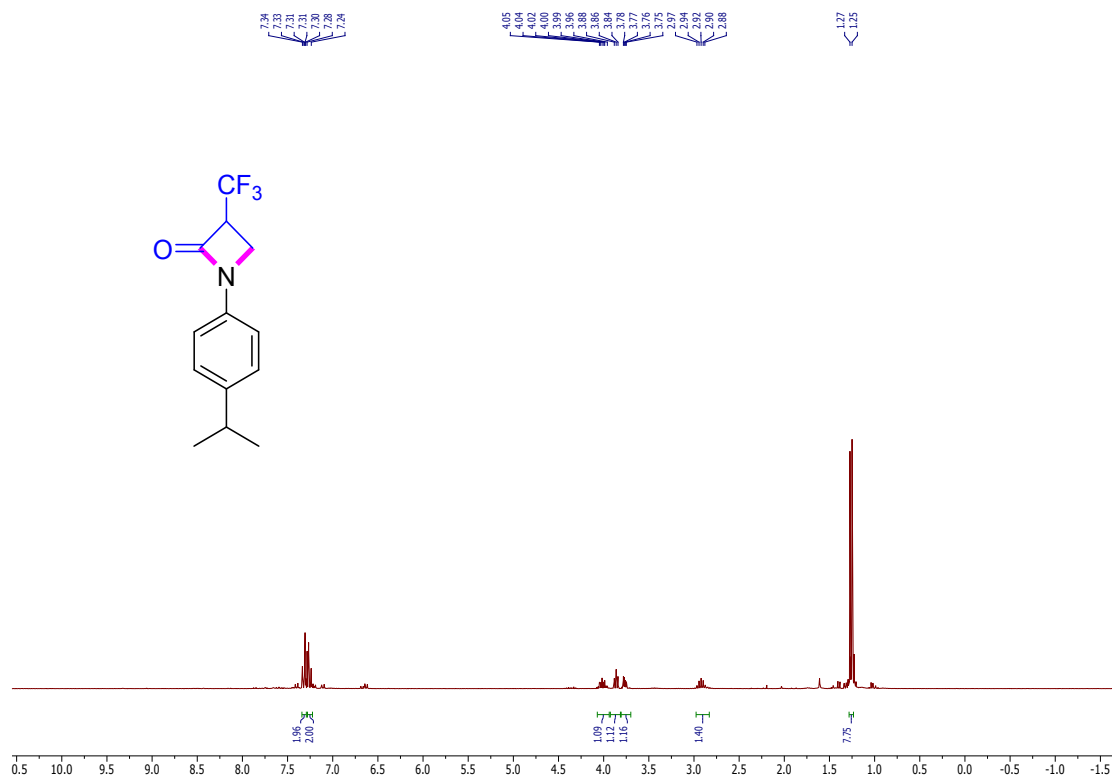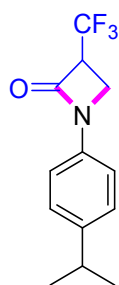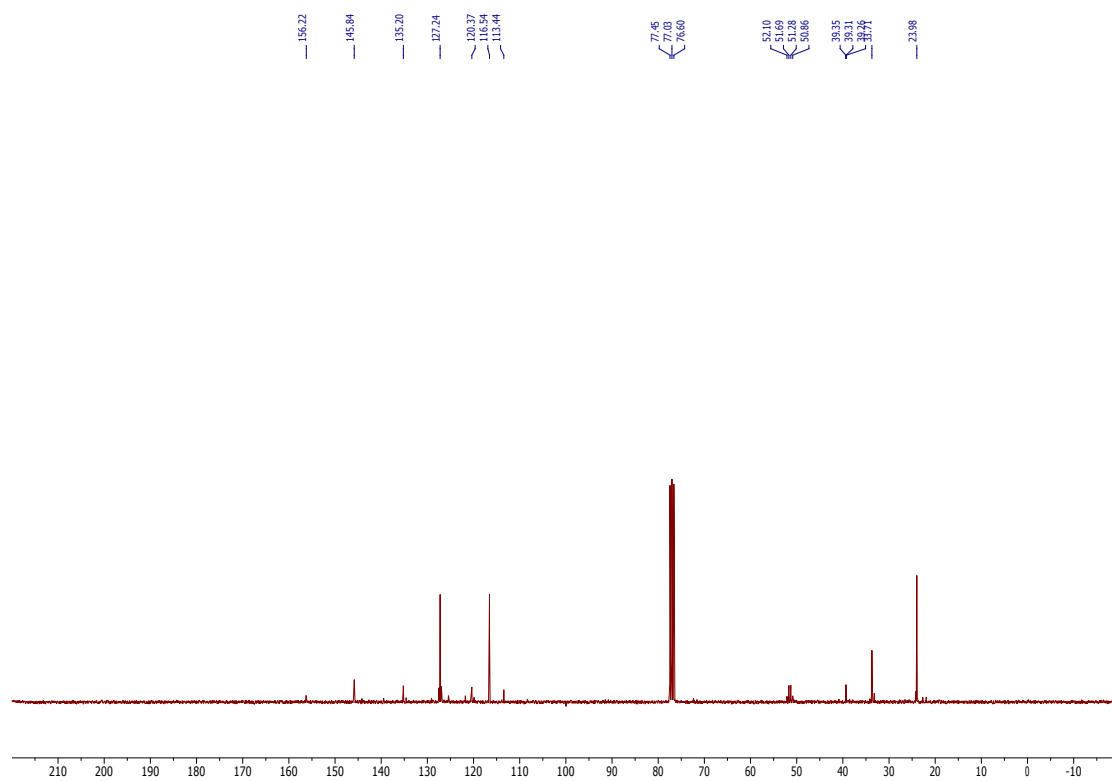

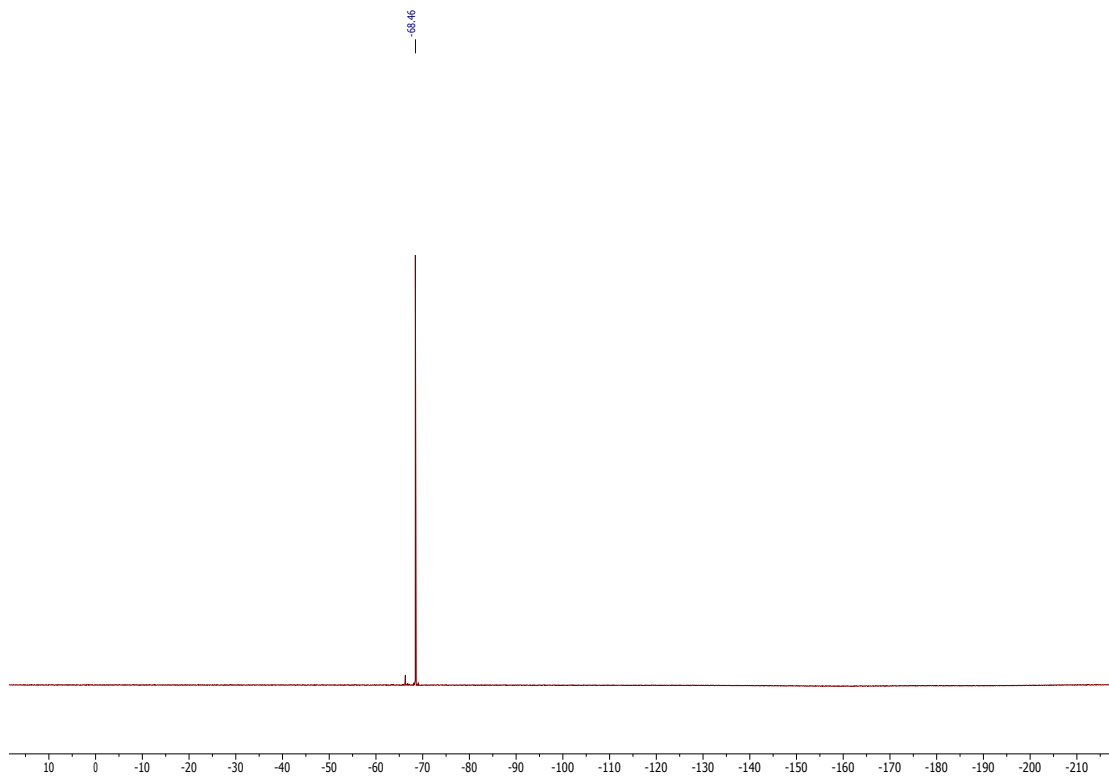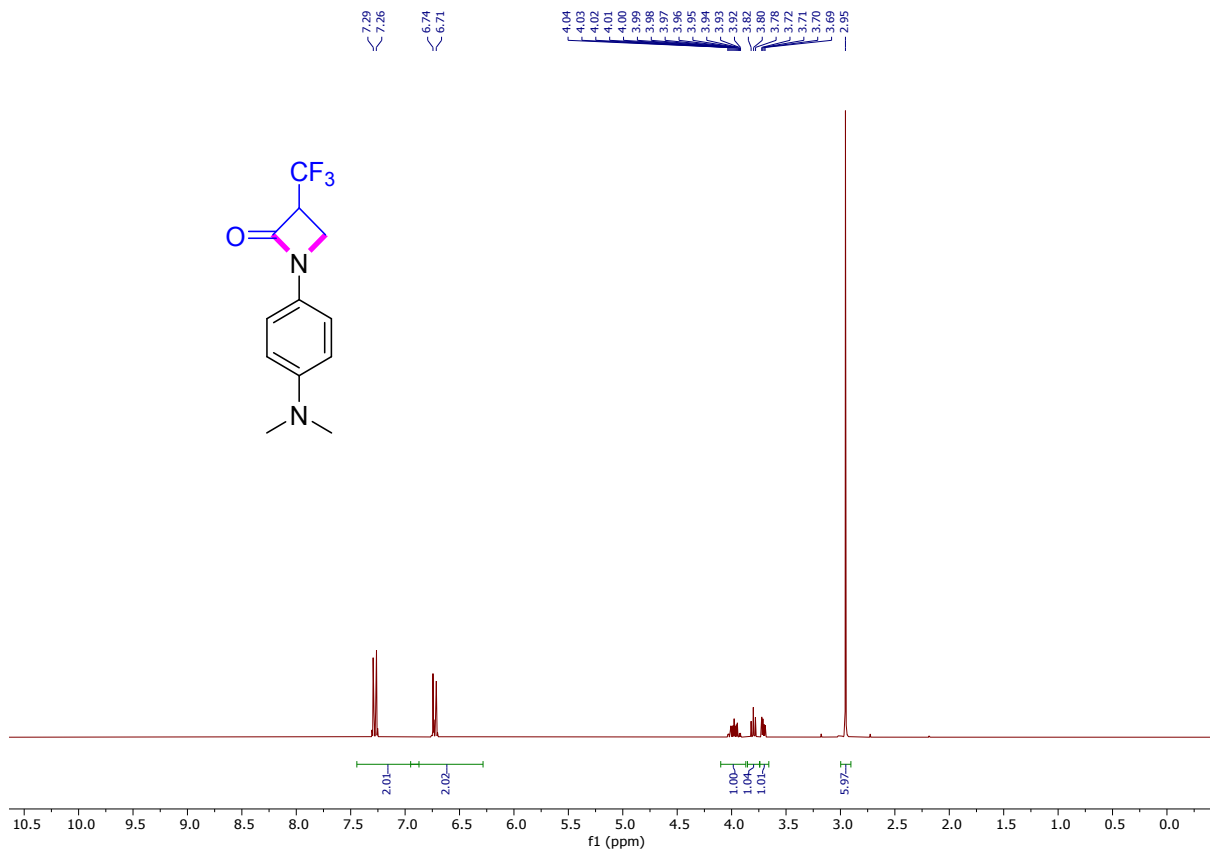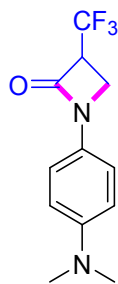

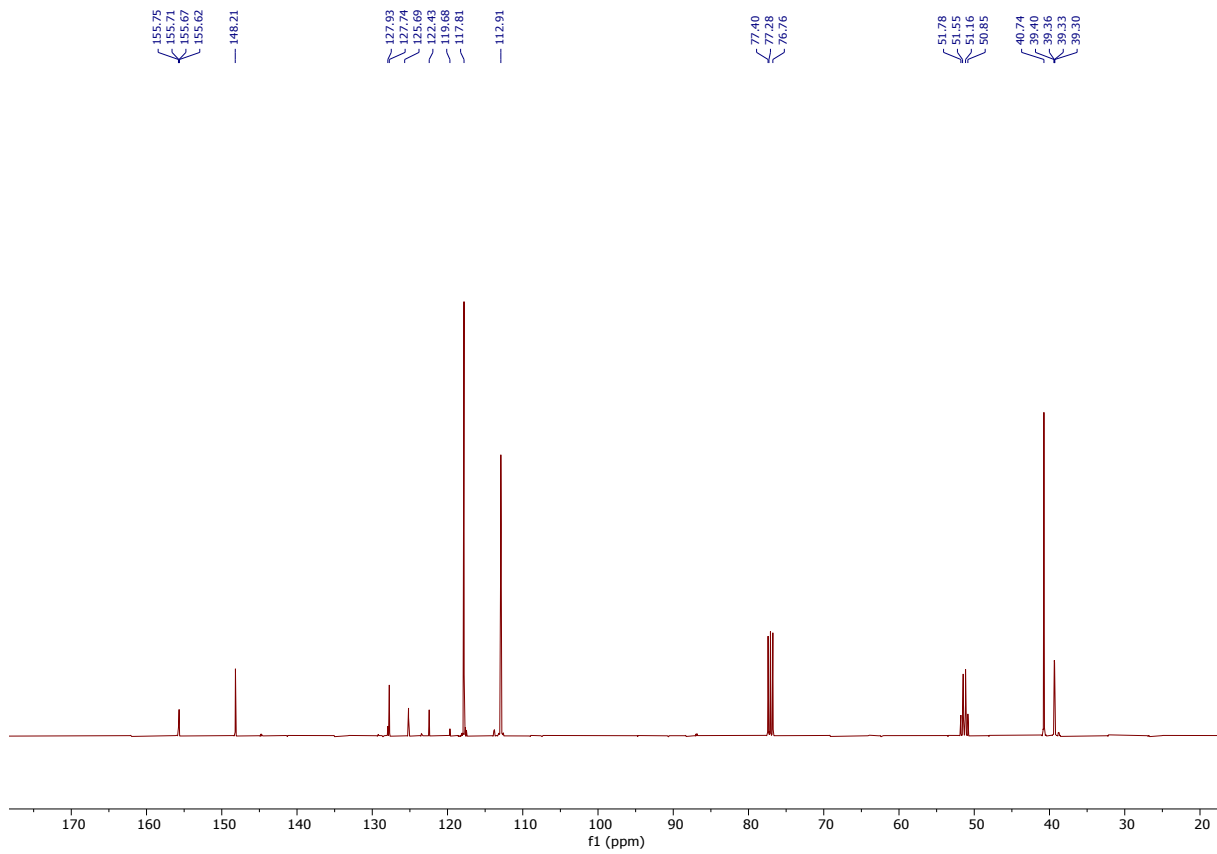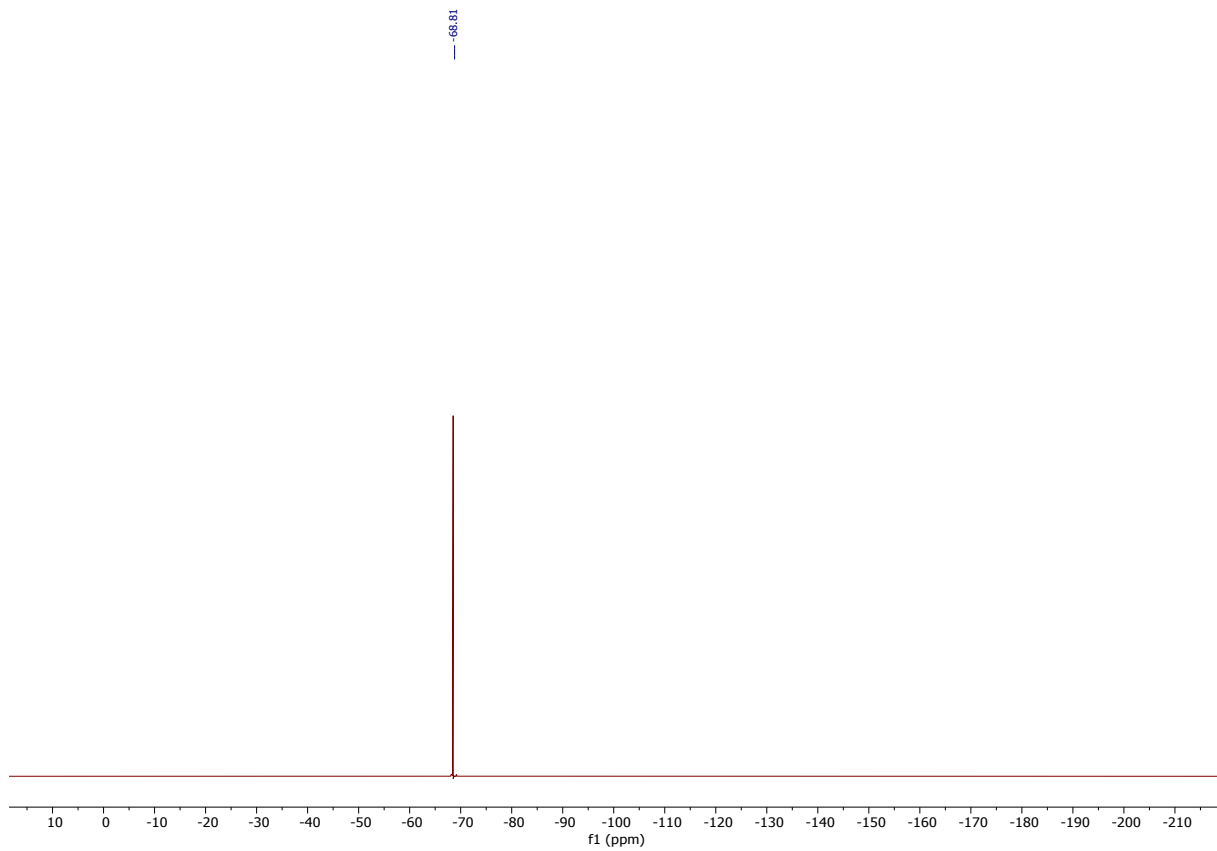

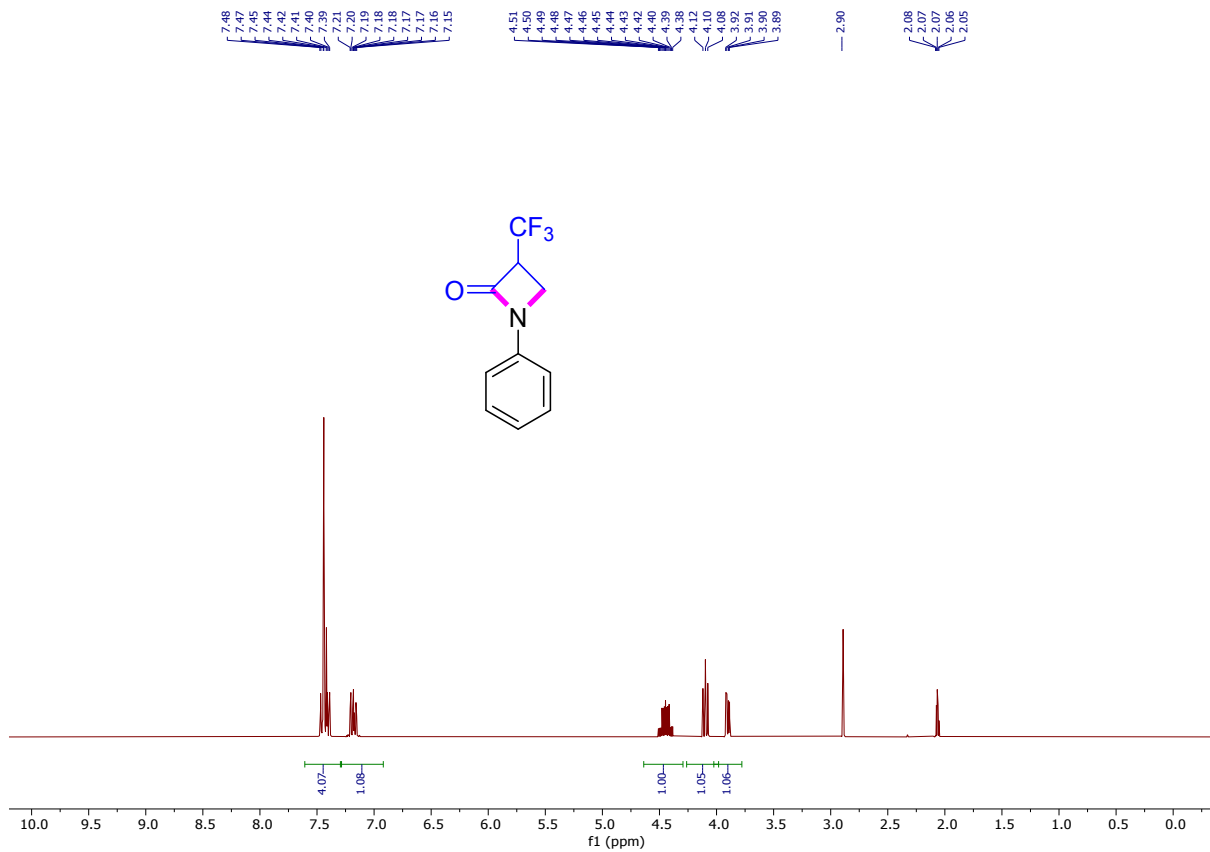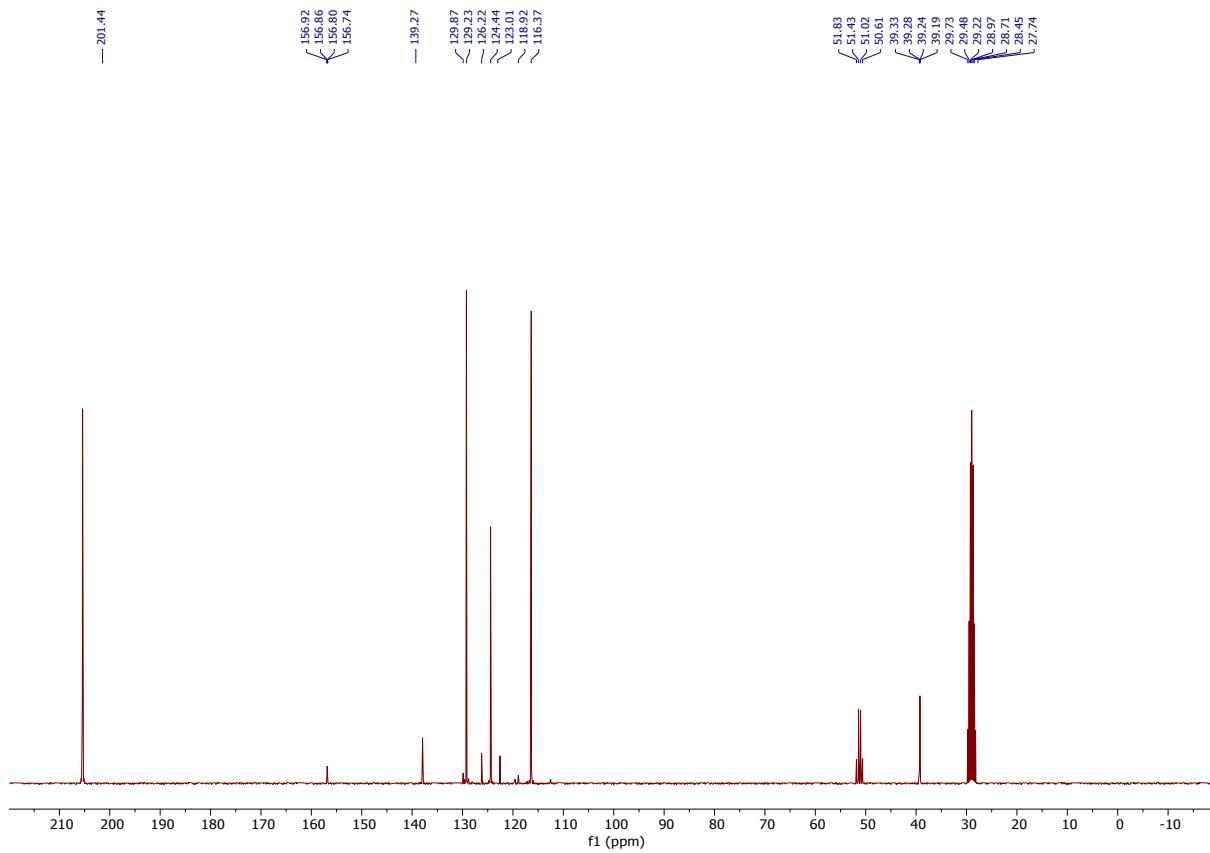

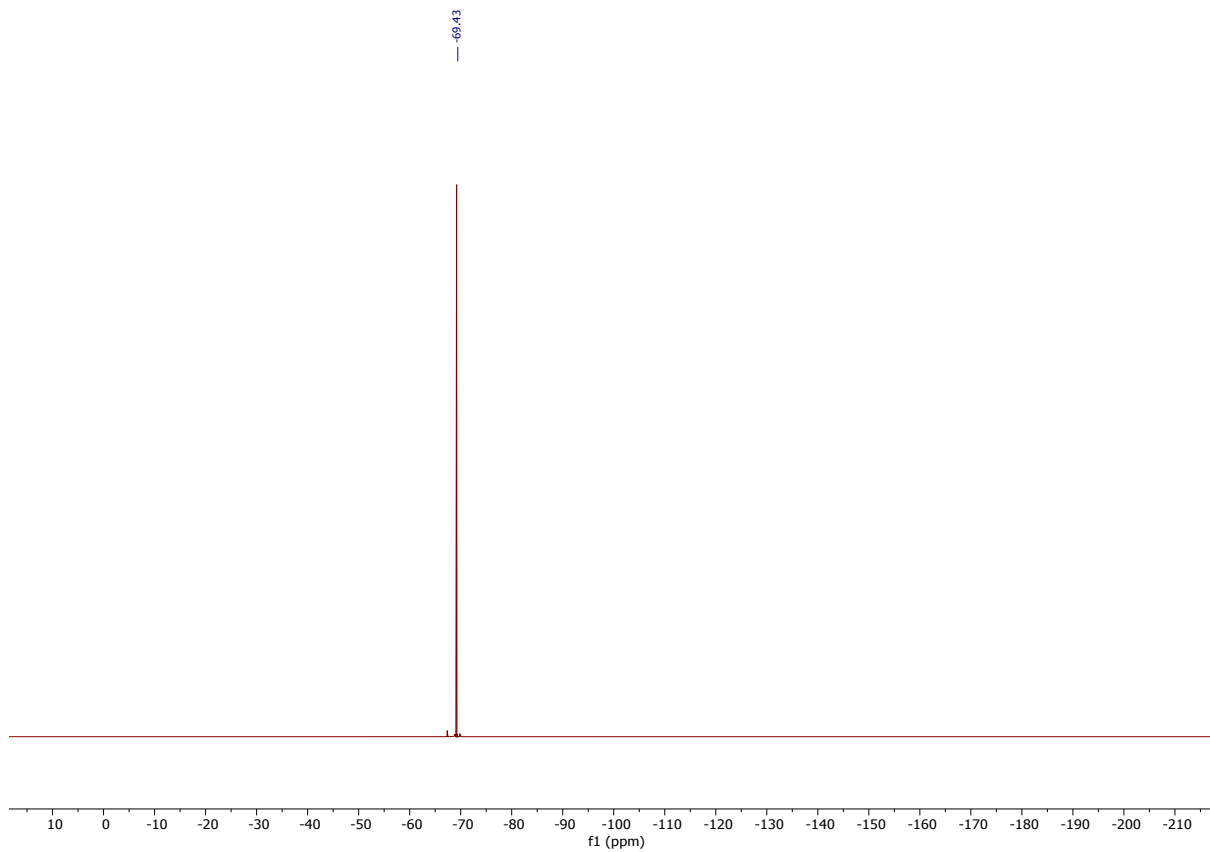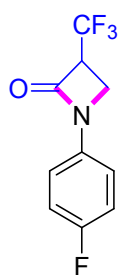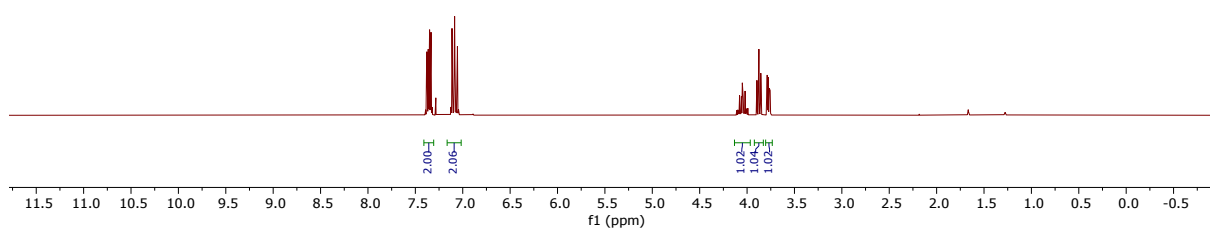

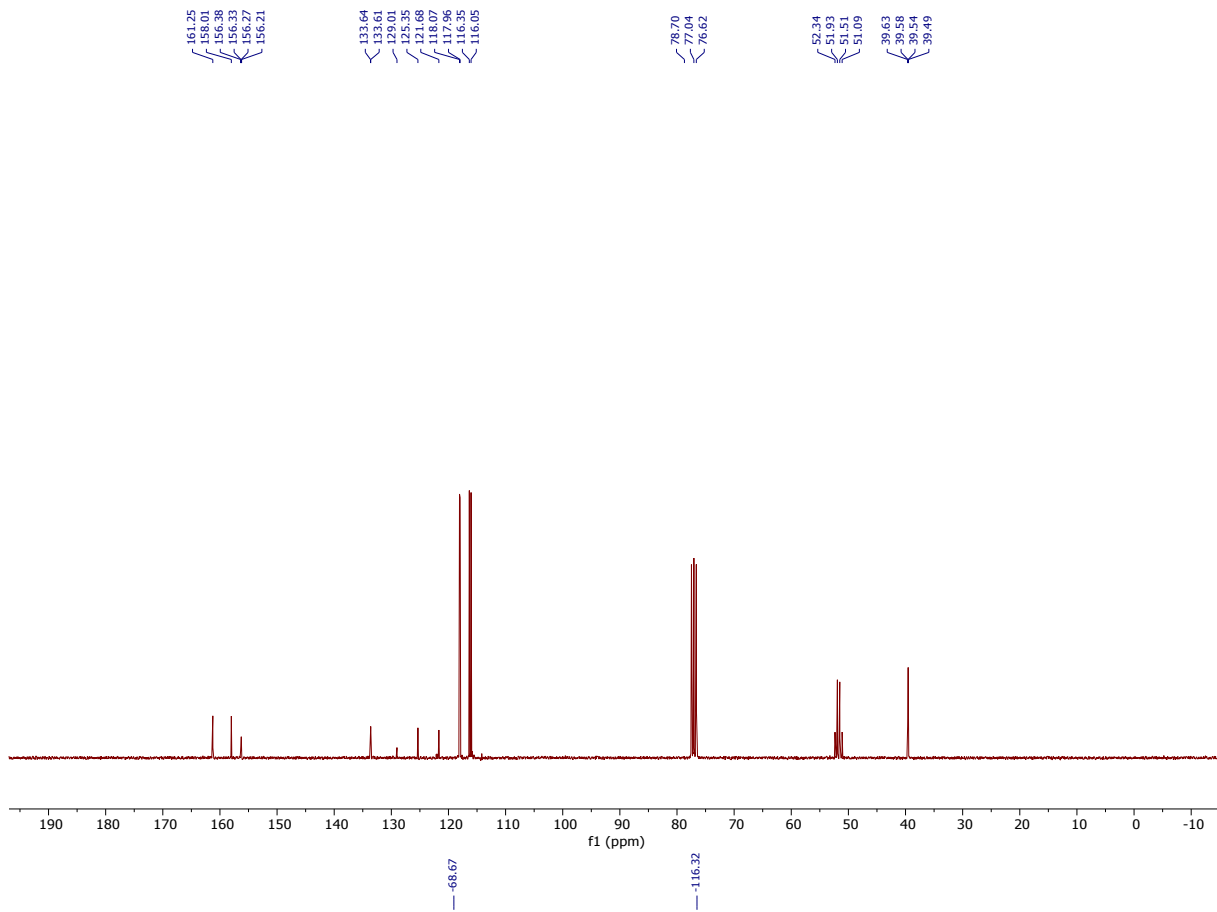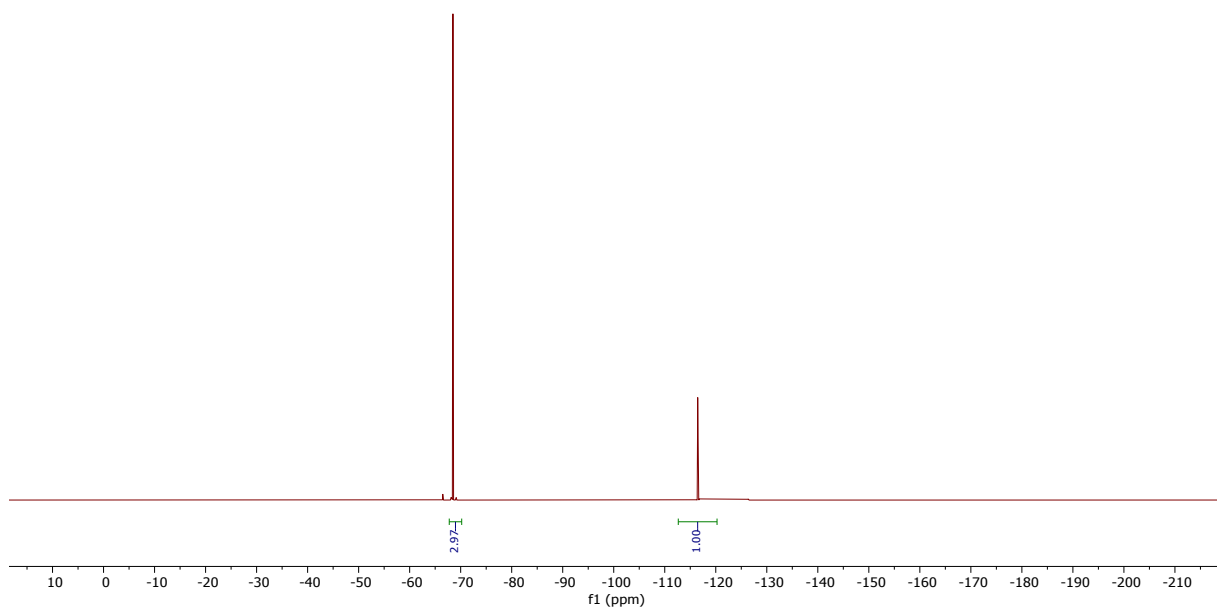

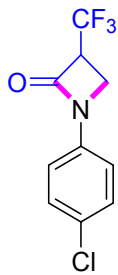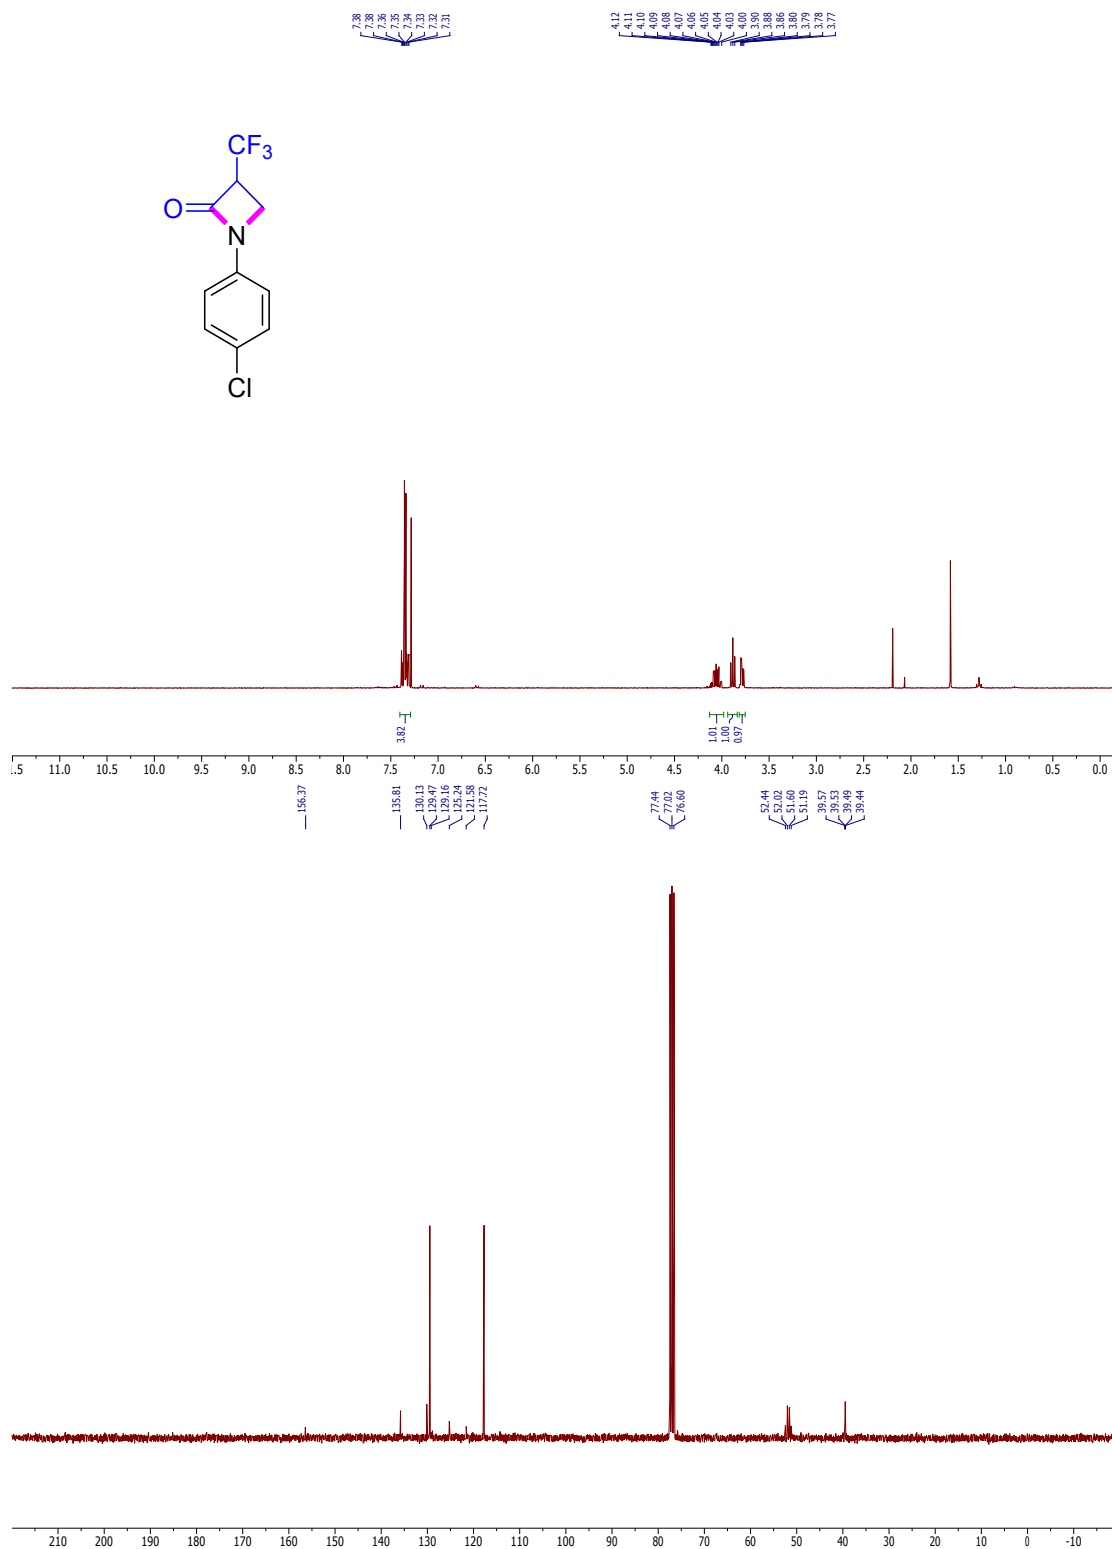

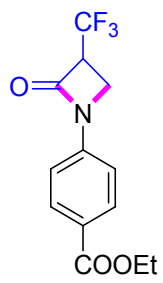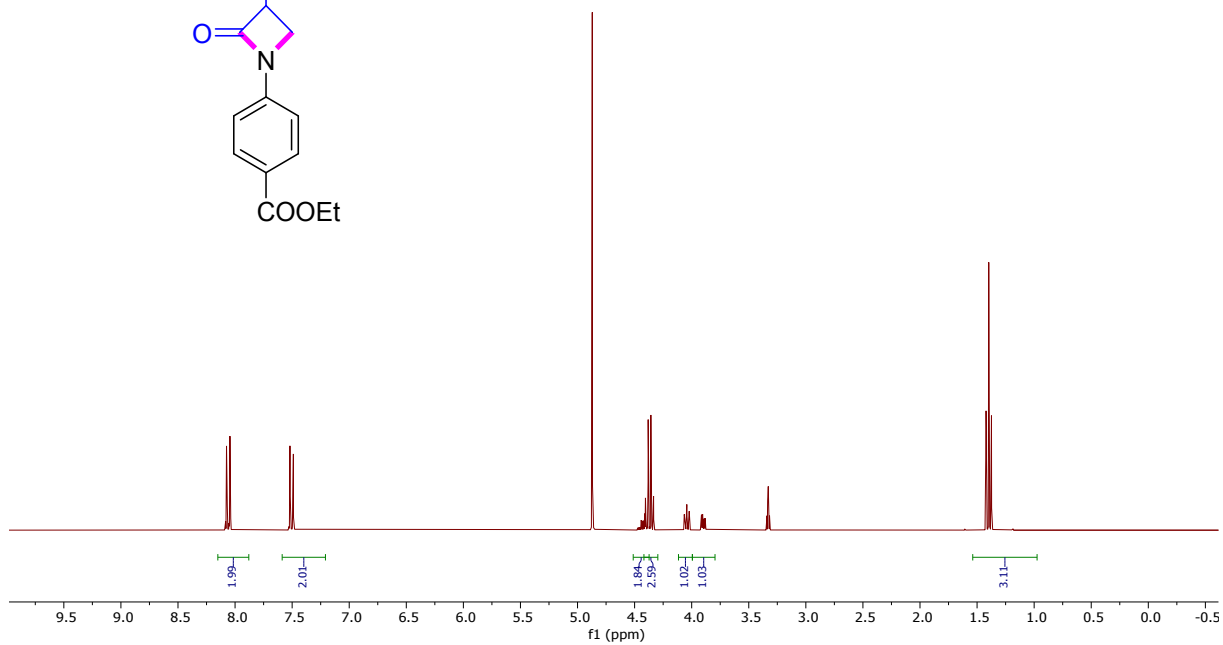



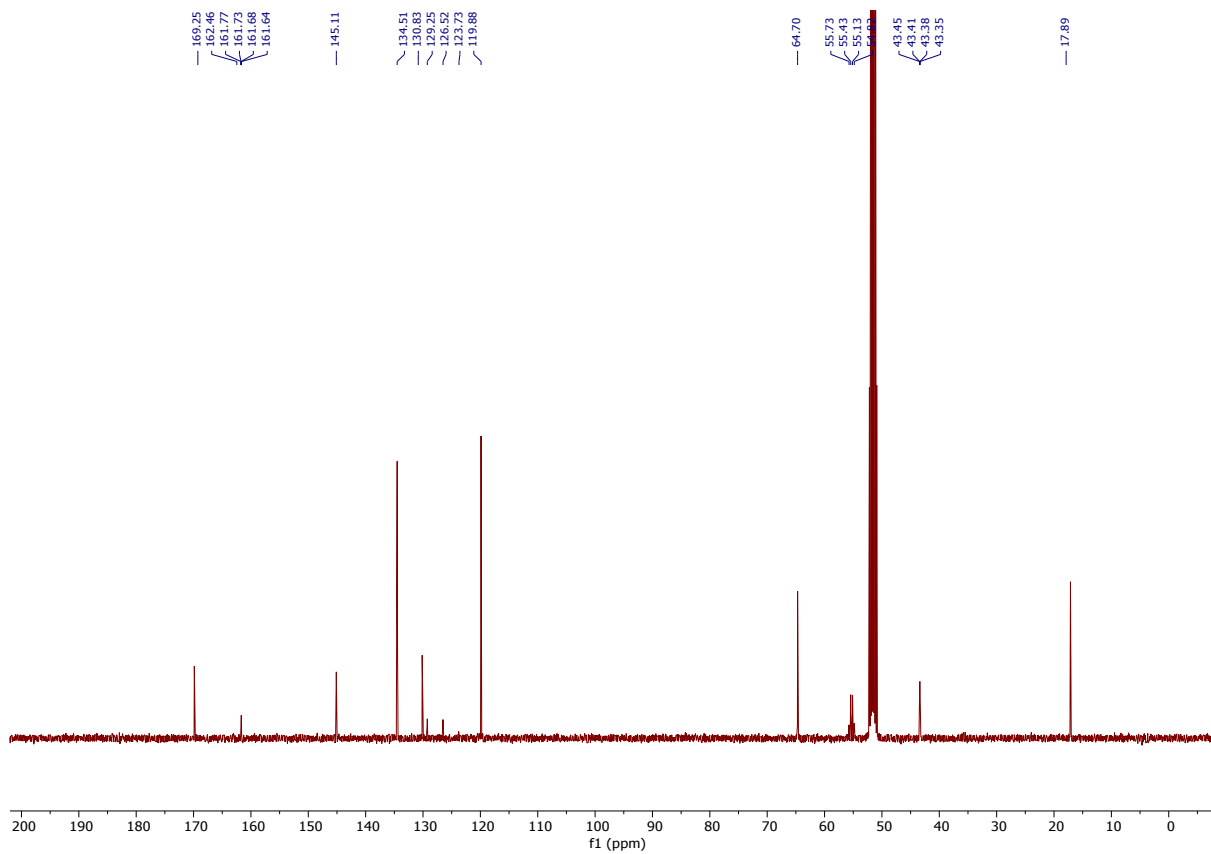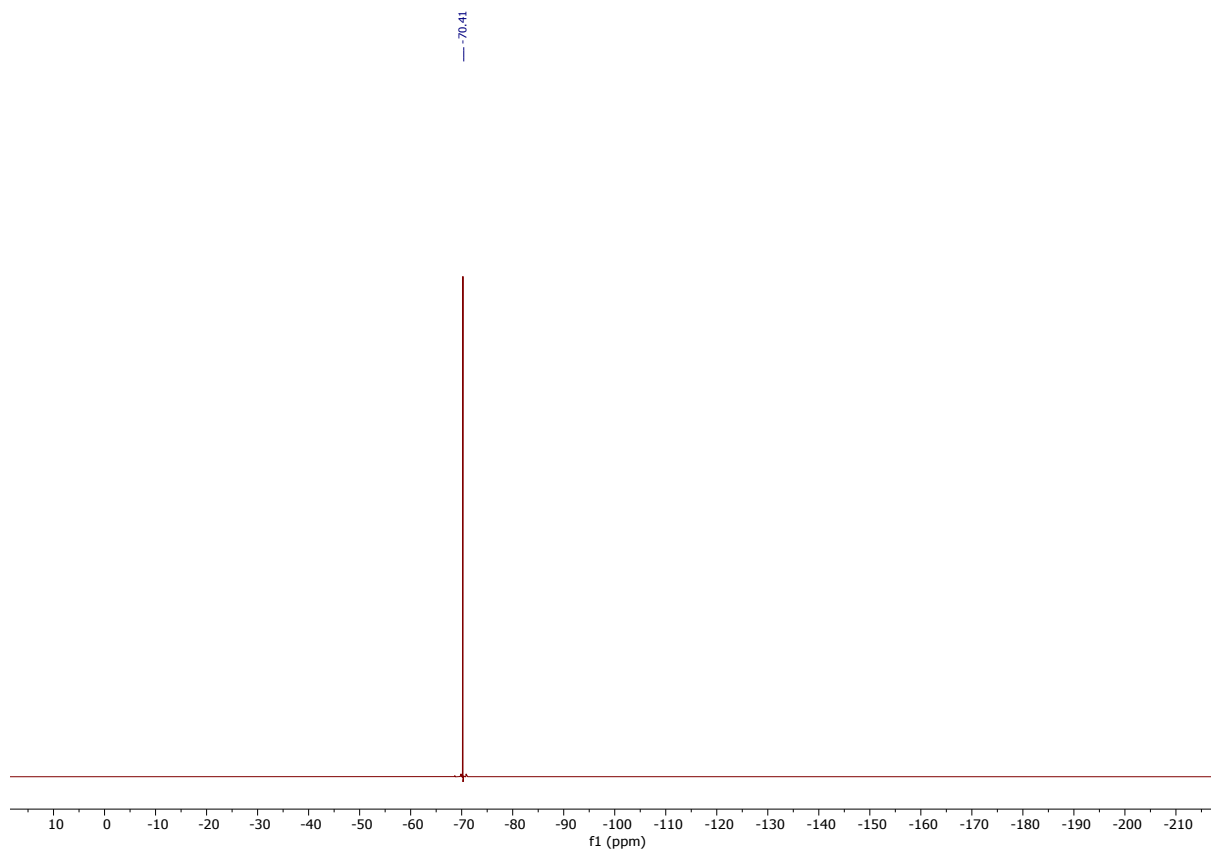

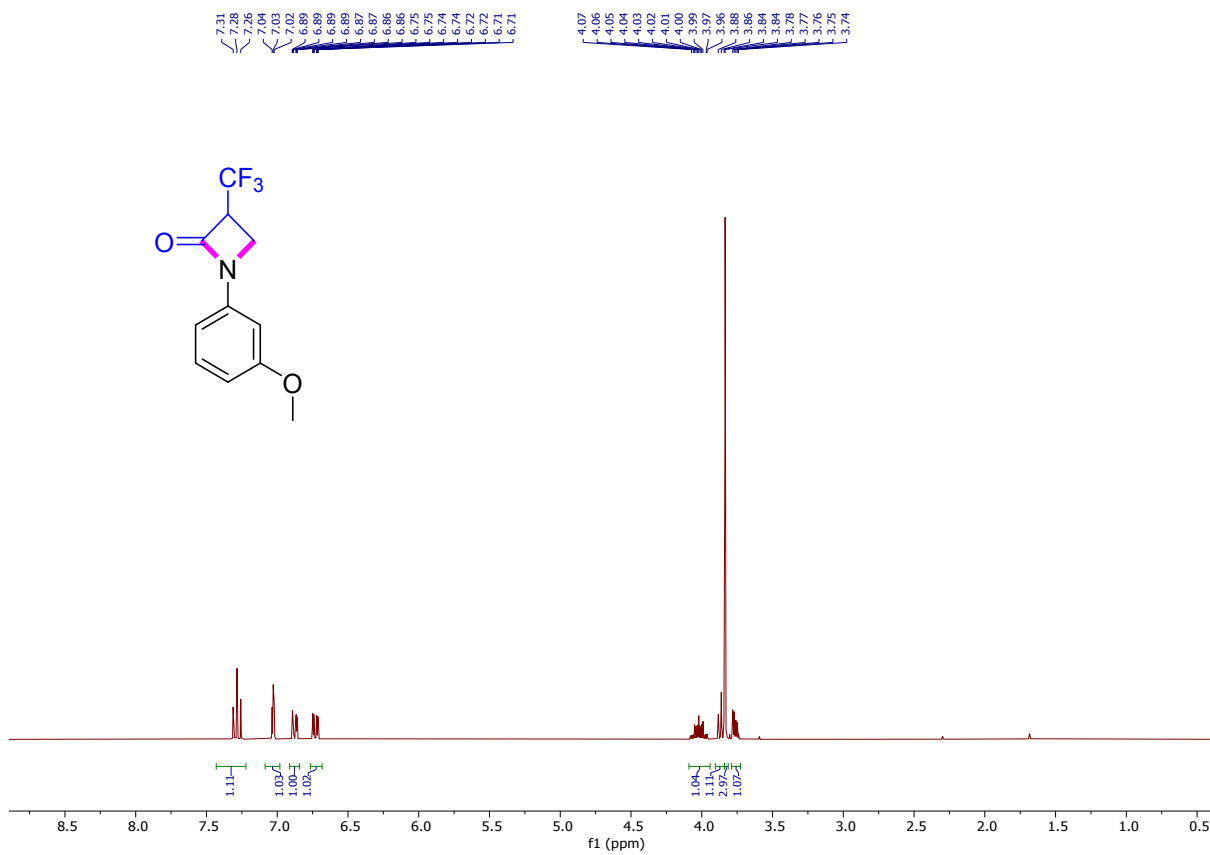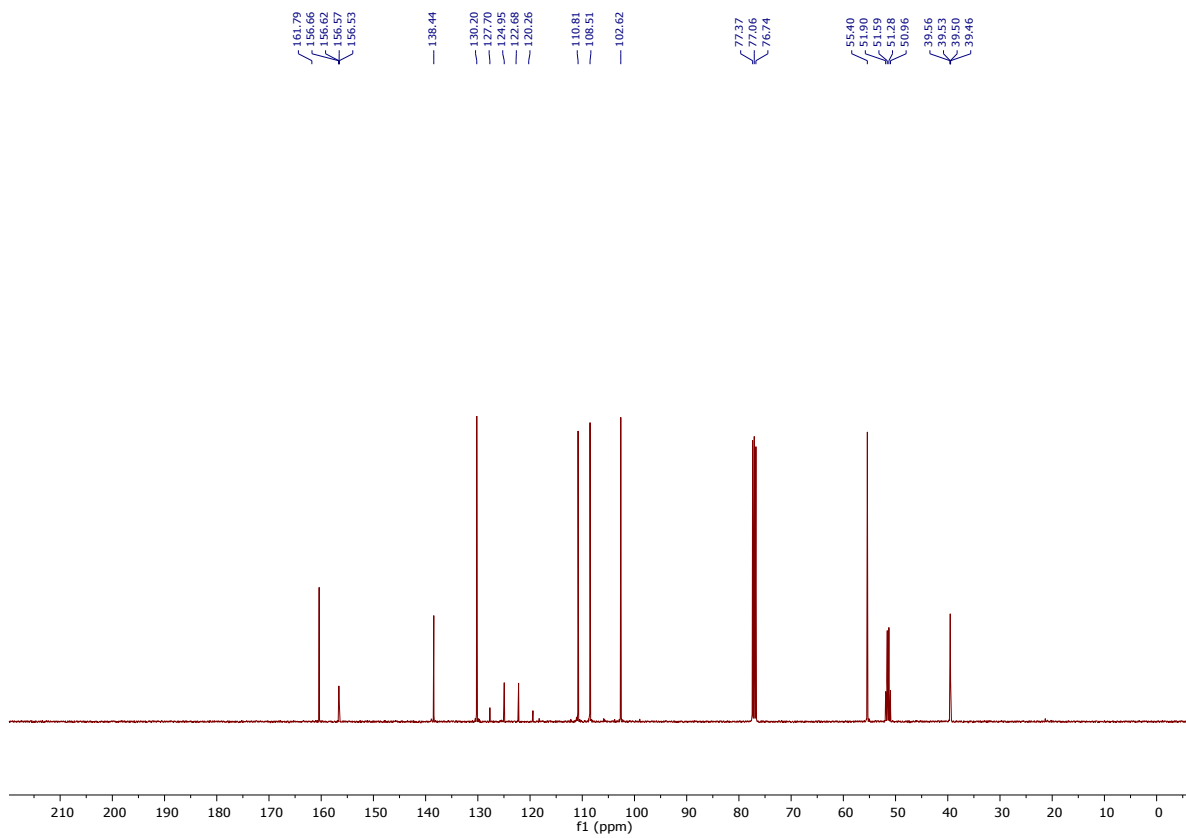

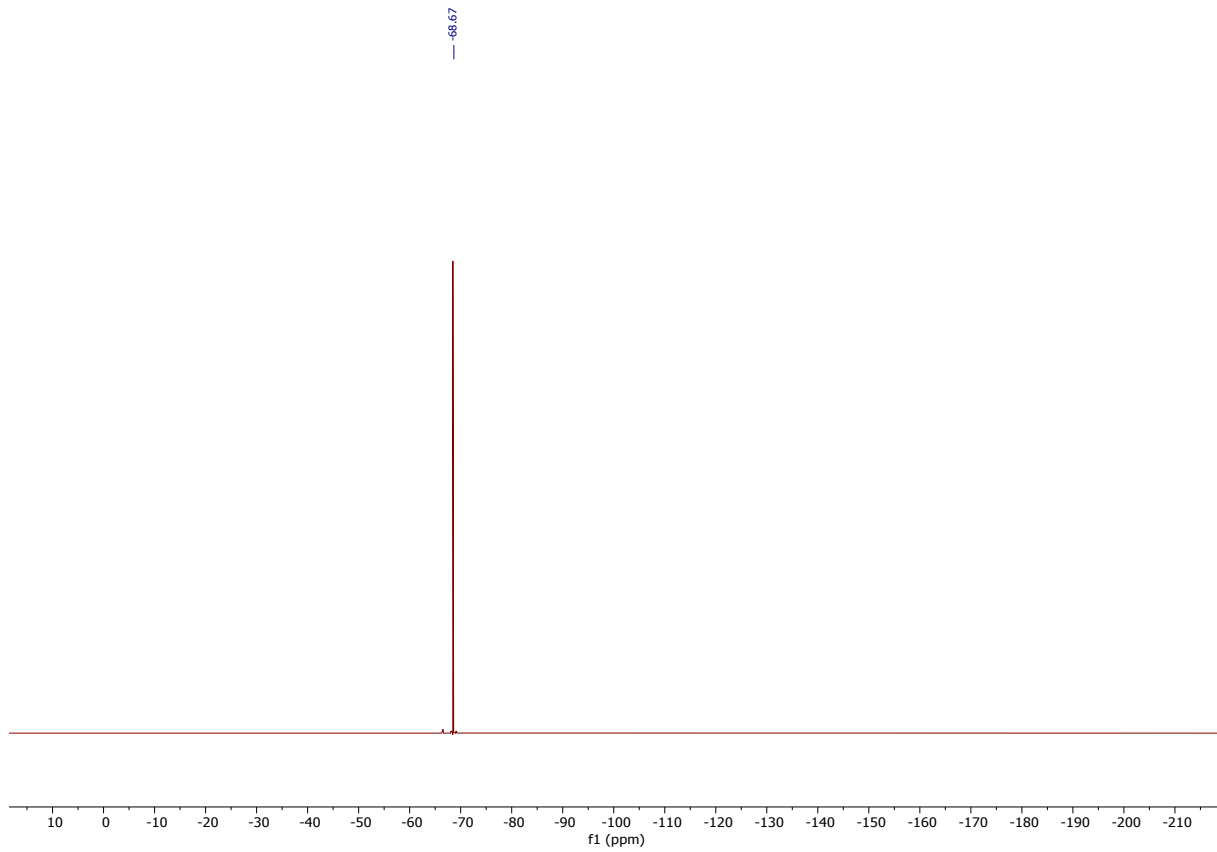

8.63, 7.725, 7.722, 7.720, 7.702, 7.701, 7.701, 7.700, 6.688, 6.687, 6.687, 6.687, 6.687, 6.685, 6.685, 6.684, 6.684, 6.683, 6.668, 6.667, 6.667, 6.665, 6.665, 6.655, 6.655, 6.654, 6.644, 4.498, 4.497, 4.477, 4.466, 4.465, 4.445, 4.444, 4.442, 4.441, 4.441, 4.440, 4.438, 4.436, 4.436, 4.088, 4.088, 4.066, 4.066, 4.064, 4.064, 3.388, 3.387, 3.386, 3.385, 3.384, 3.384, 3.384, 3.384, 2.855, 2.085, 2.085, 2.077, 2.077, 2.065, 2.065

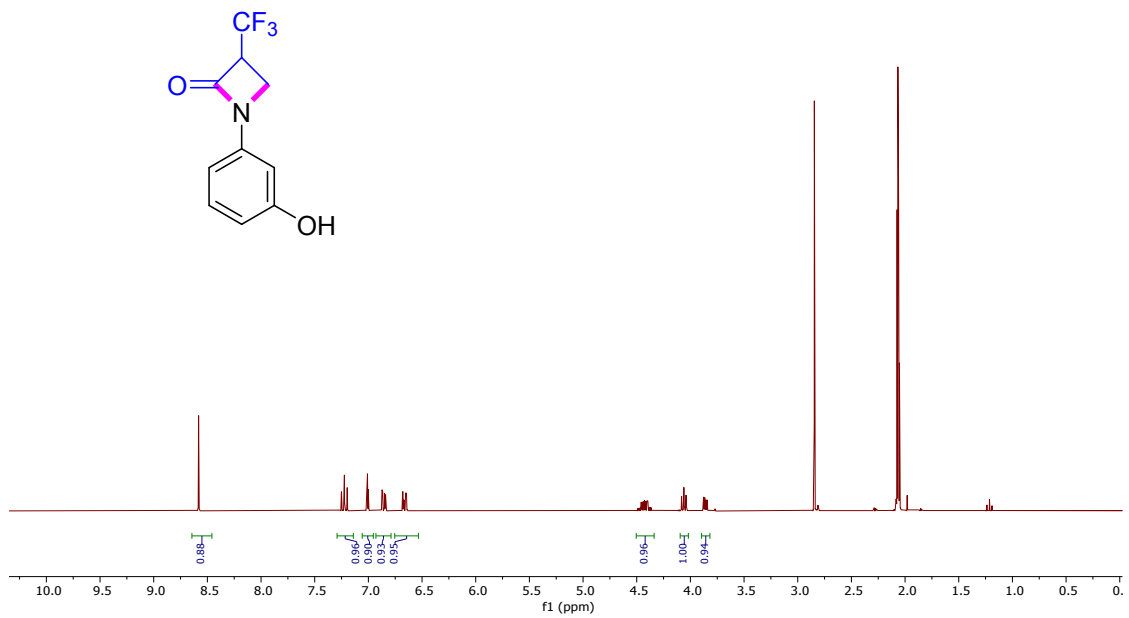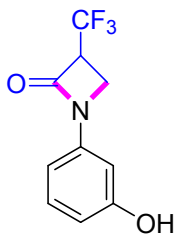

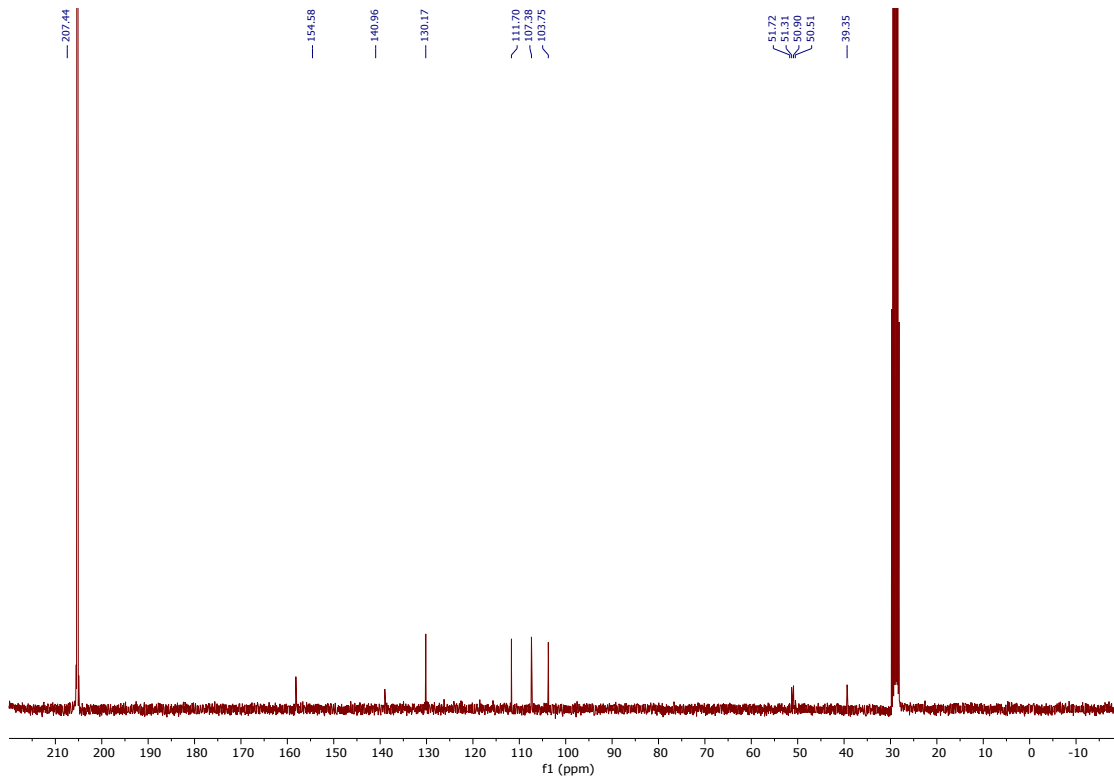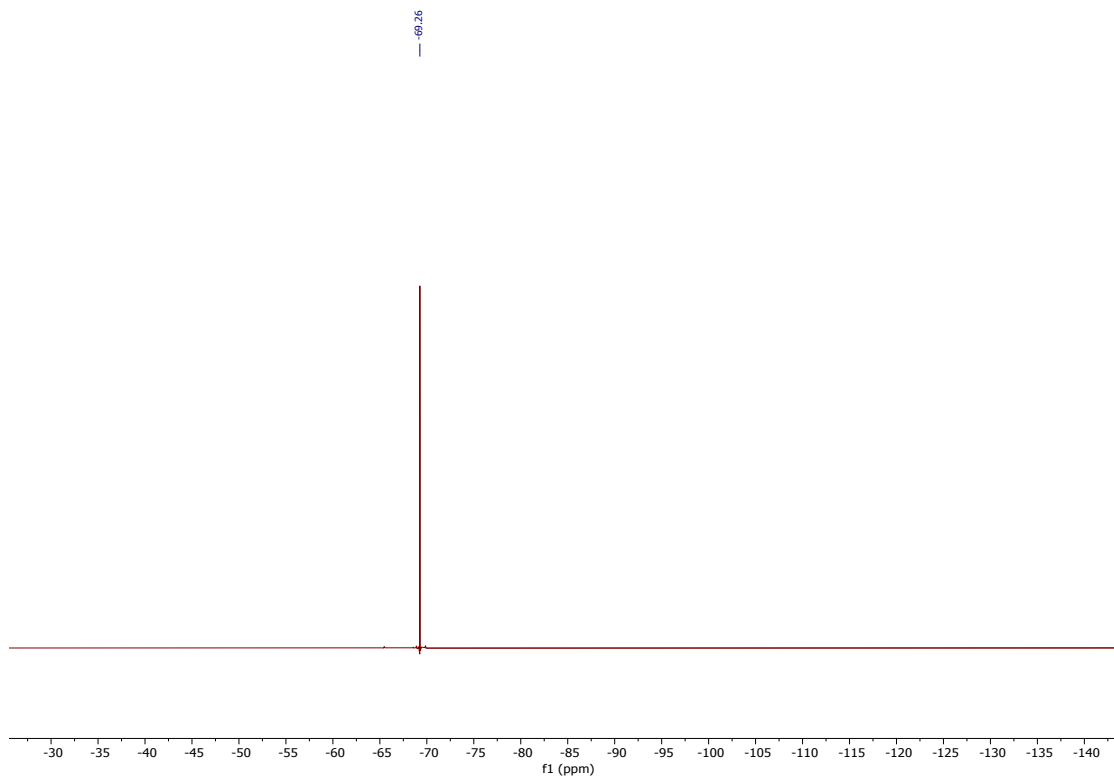

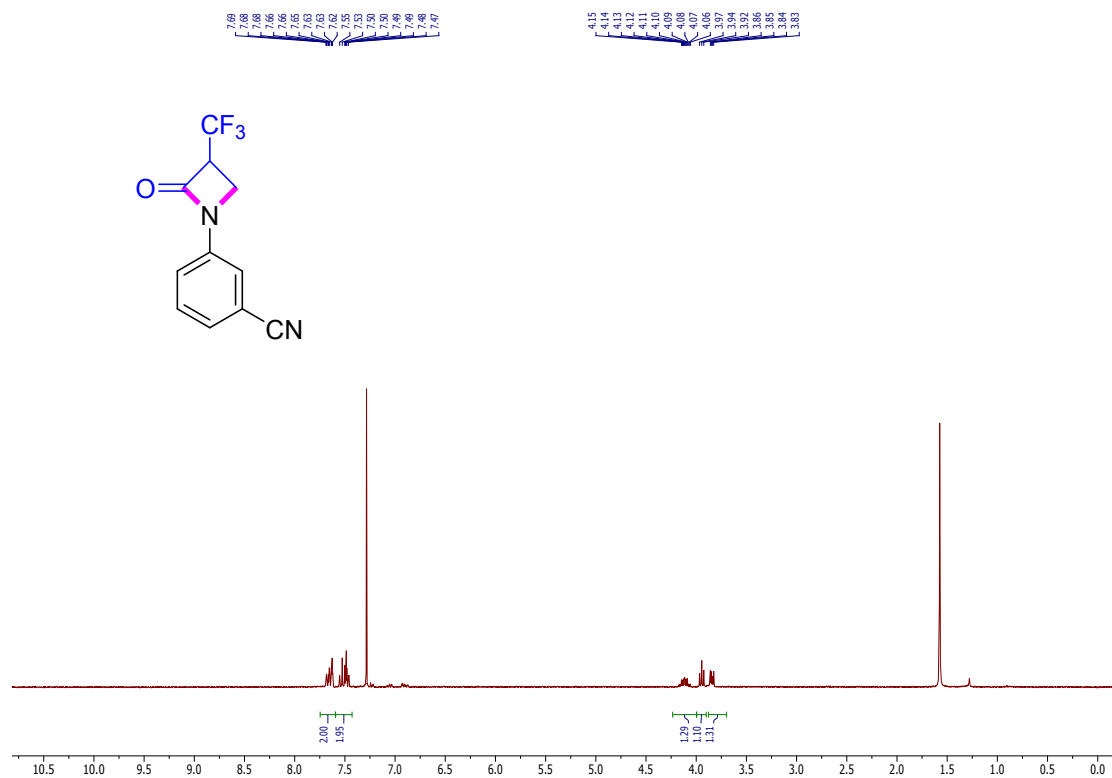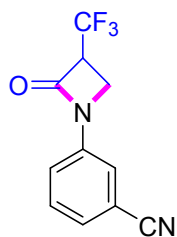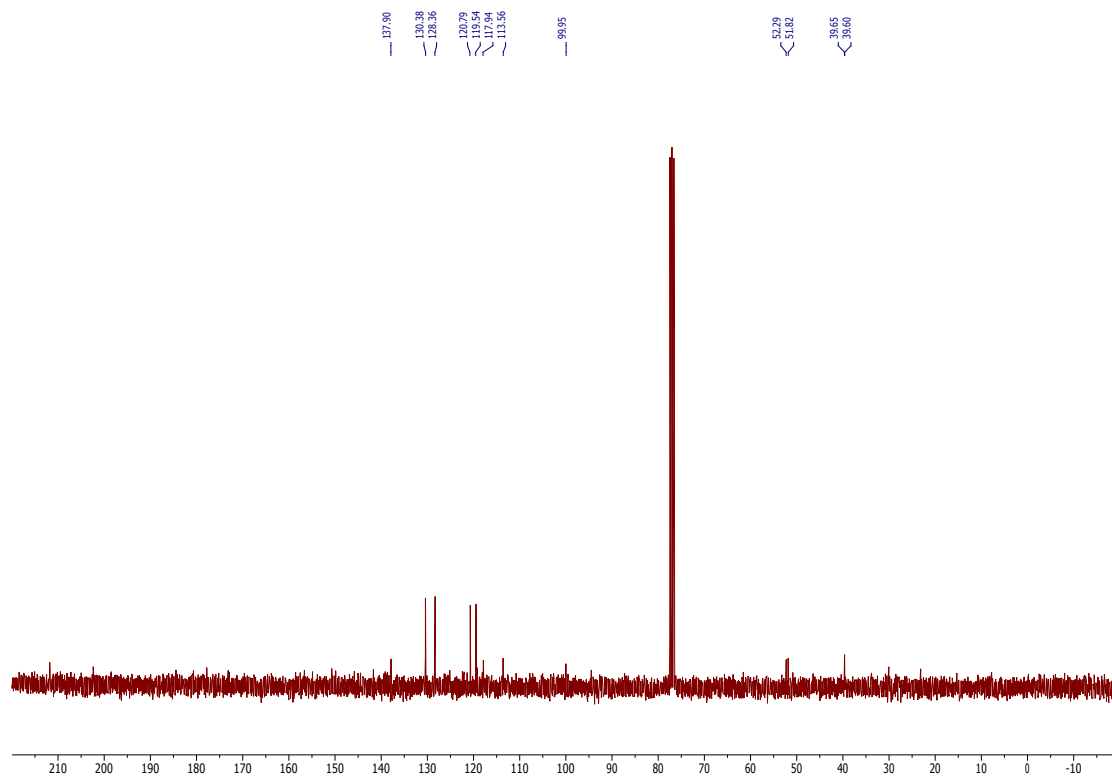

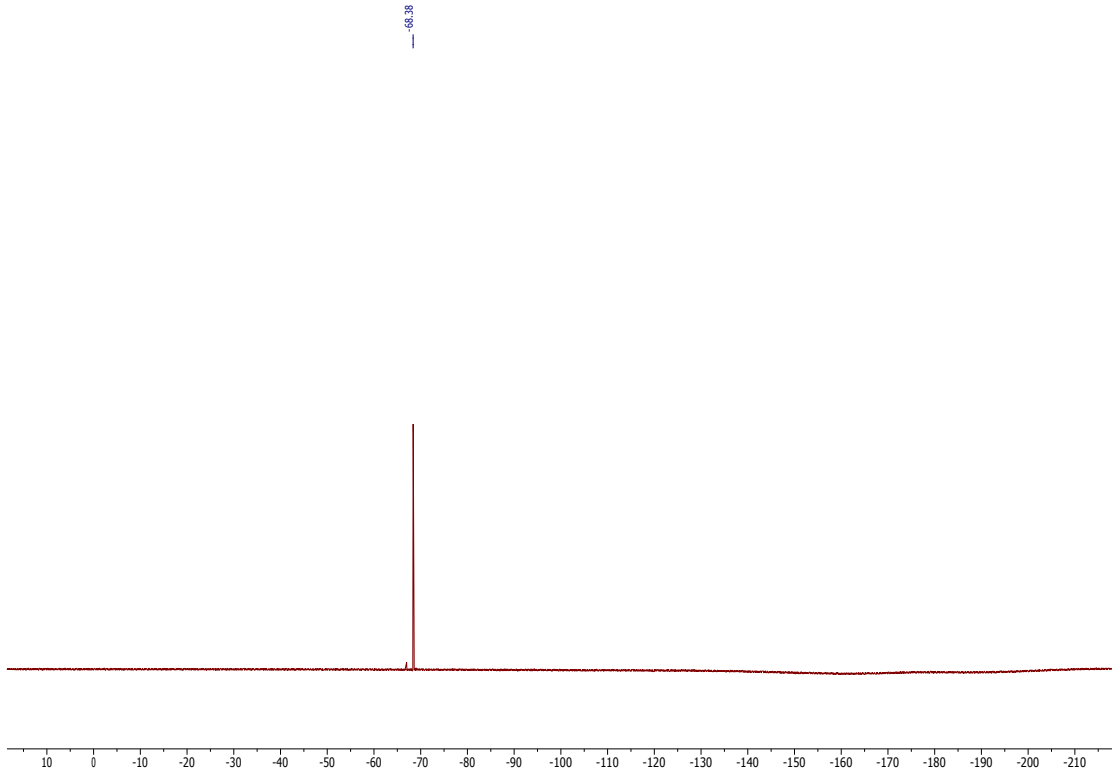

7.78, 7.77, 7.77, 7.77, 7.75, 7.75, 7.75, 7.72, 7.72, 7.71, 7.71, 7.71, 7.70, 7.68, 7.68, 7.68, 7.67, 7.41, 7.41, 7.38, 7.38, 7.36, 7.36, 7.19, 7.19, 4.03, 4.02, 4.01, 4.00, 3.99, 3.98, 3.97, 3.96, 3.94, 3.88, 3.85, 3.85, 3.84, 3.77, 3.76, 3.75, 3.74, 2.08

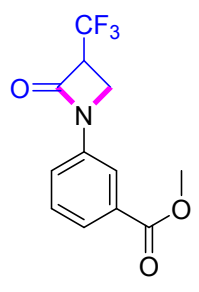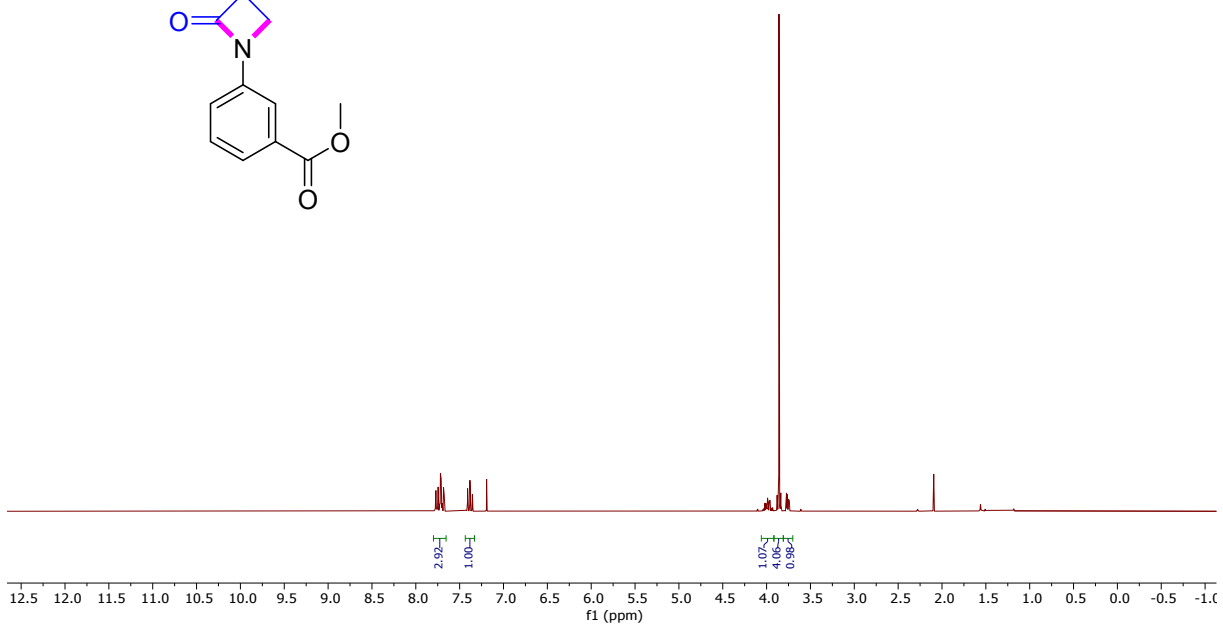

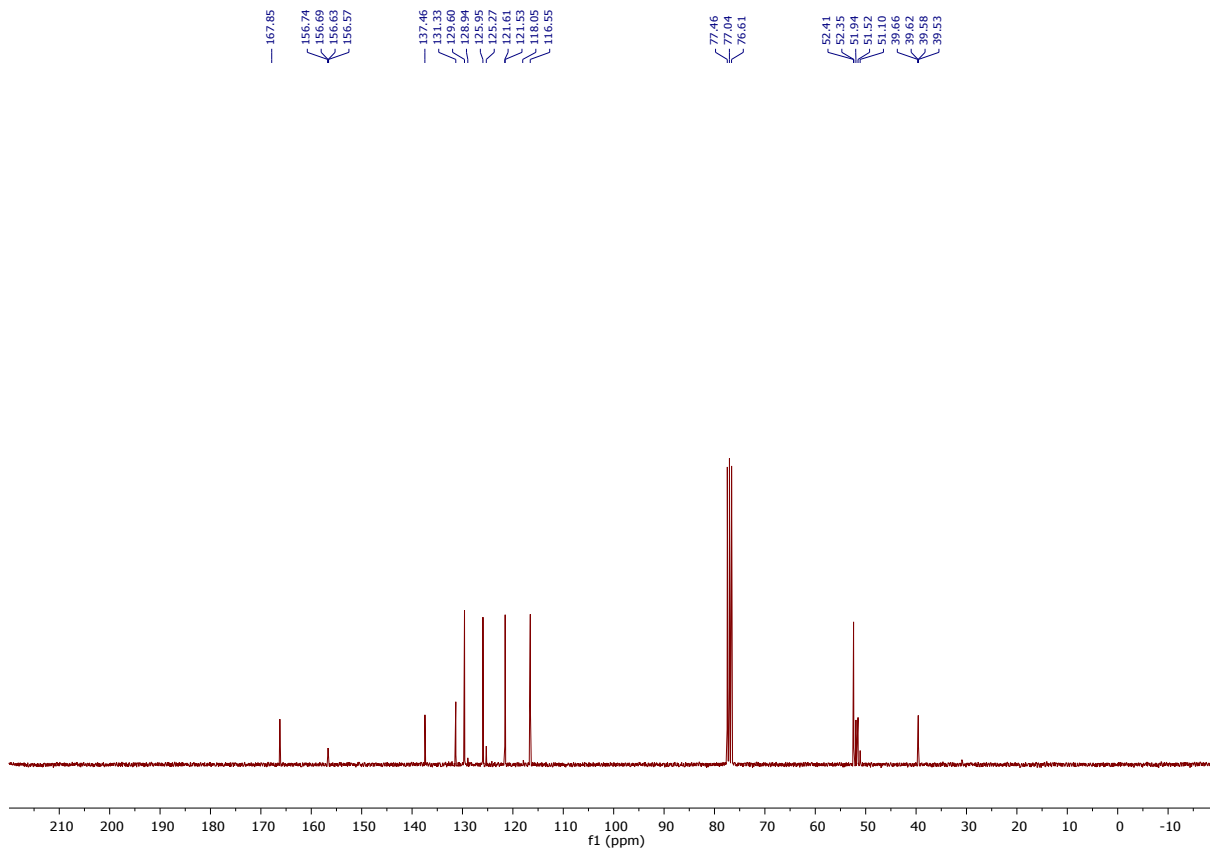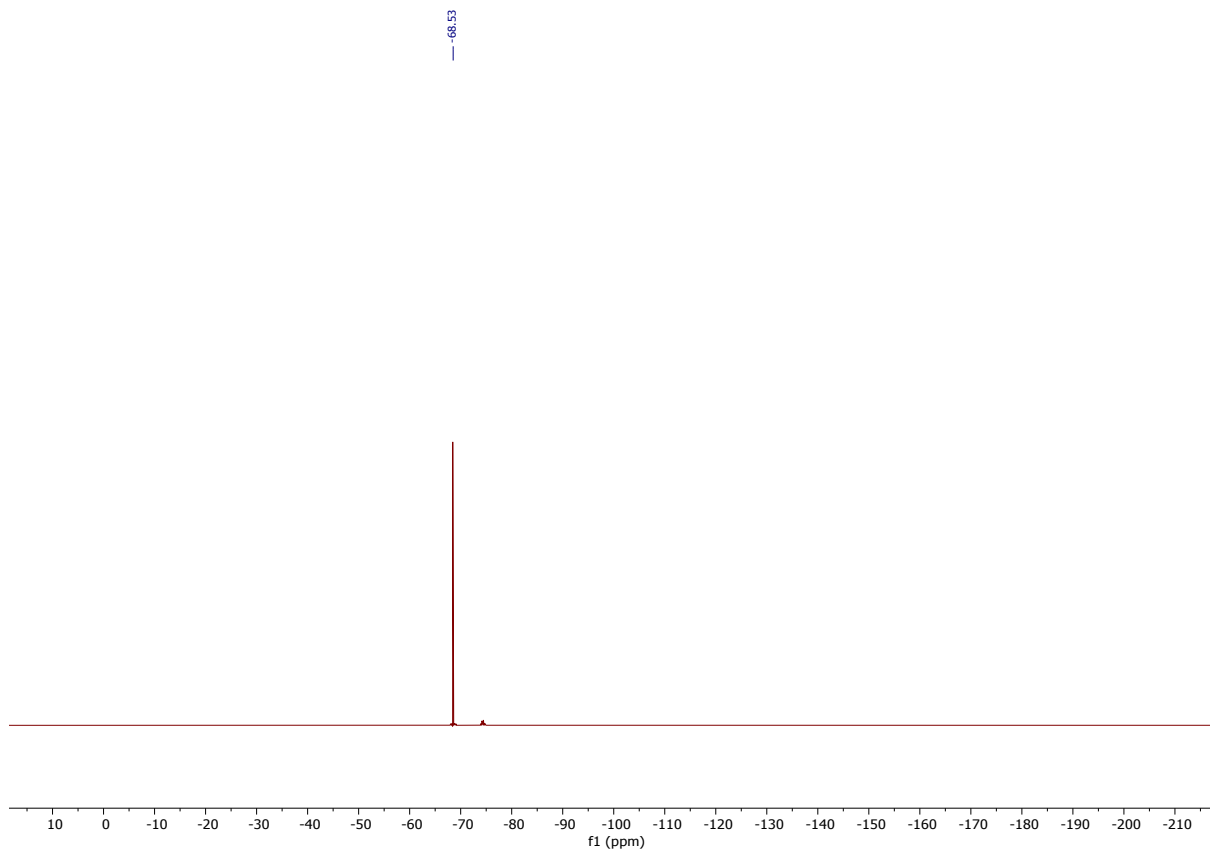

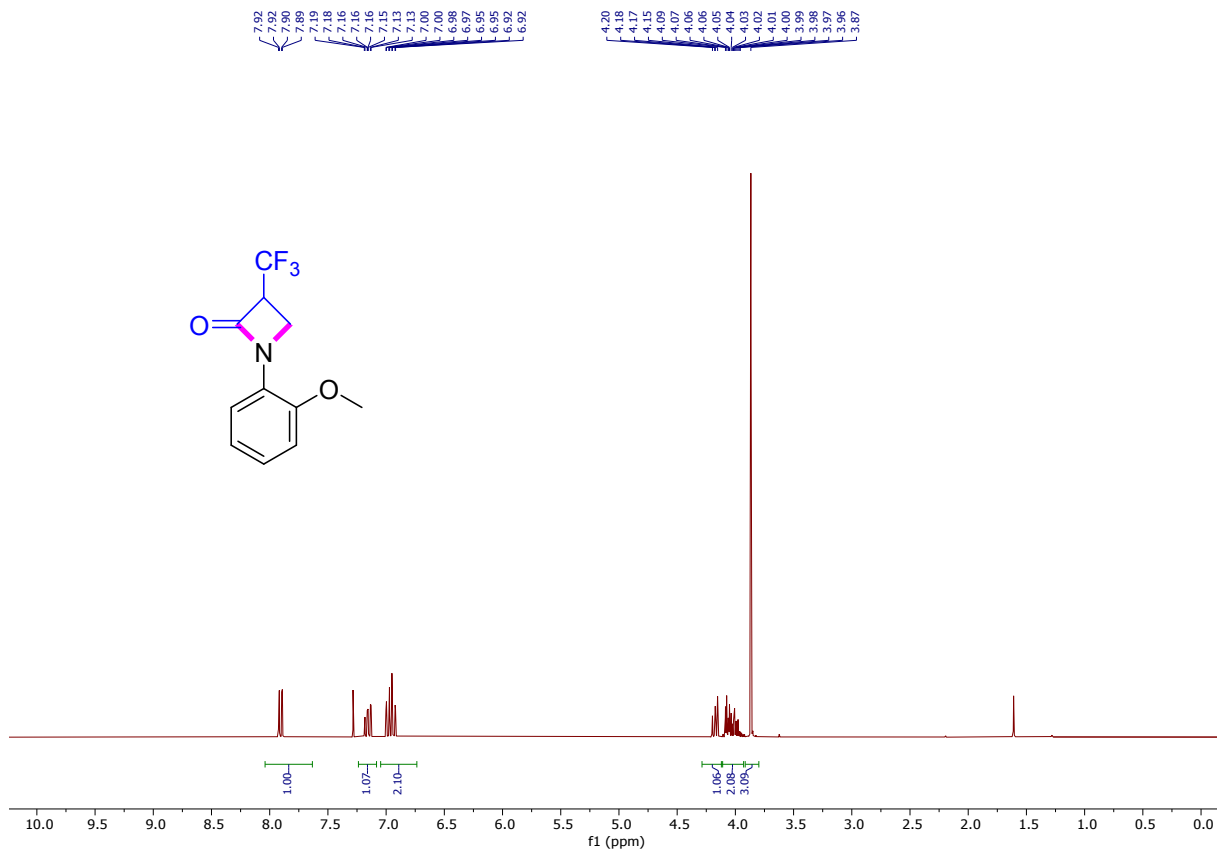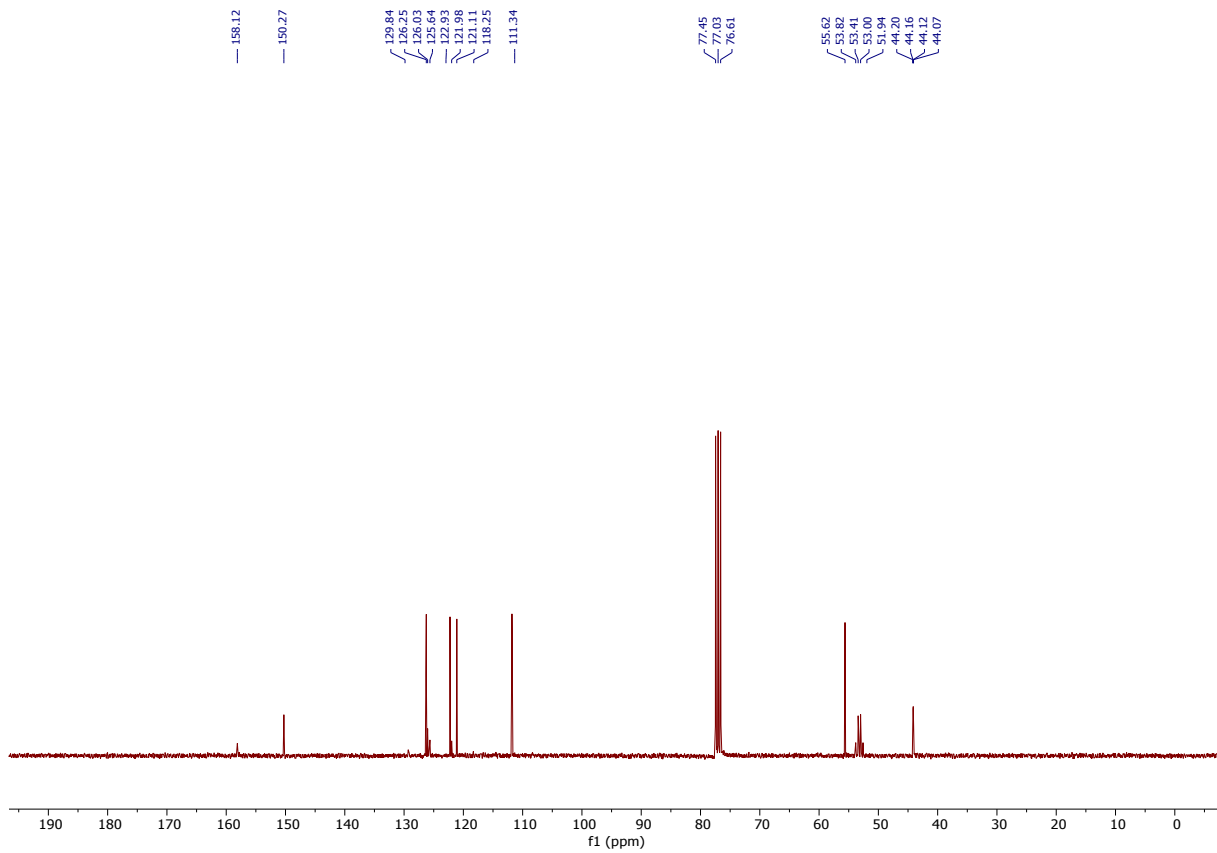



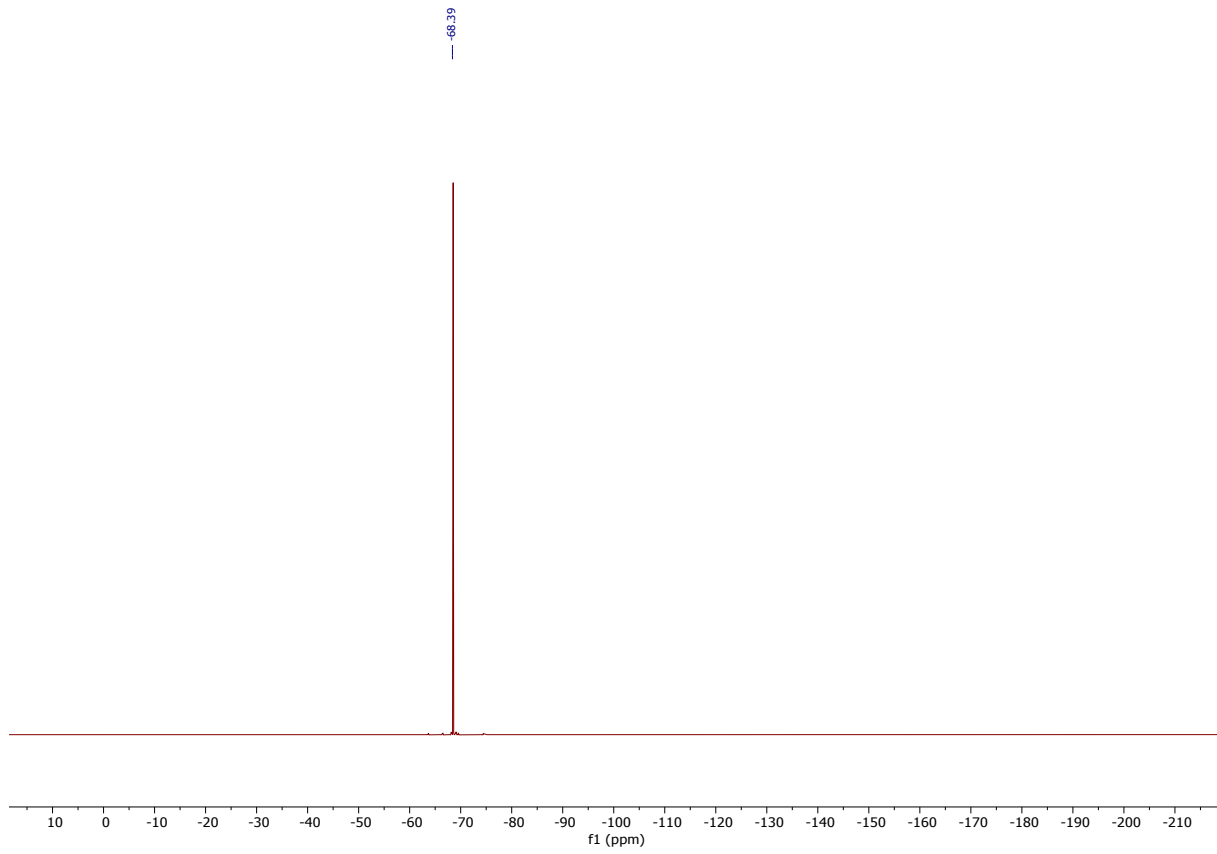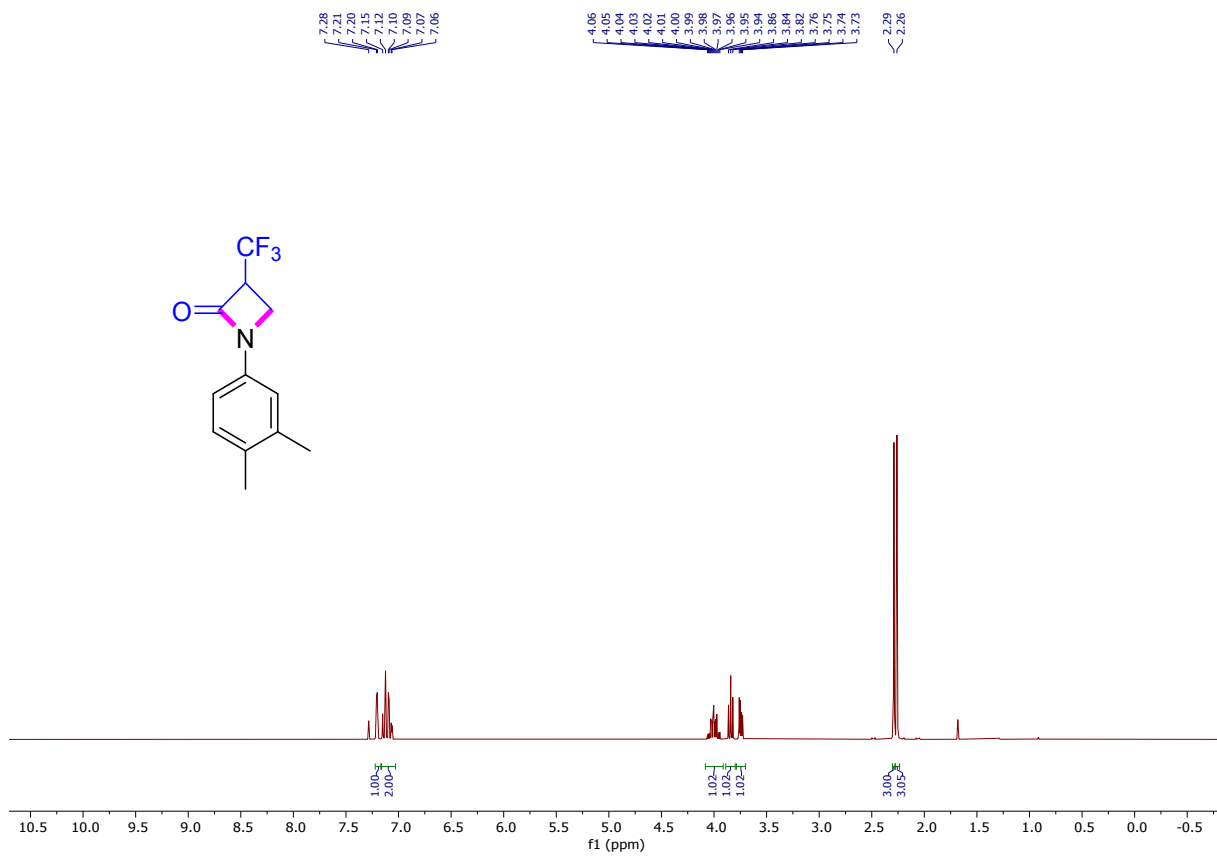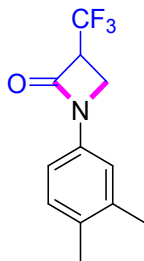

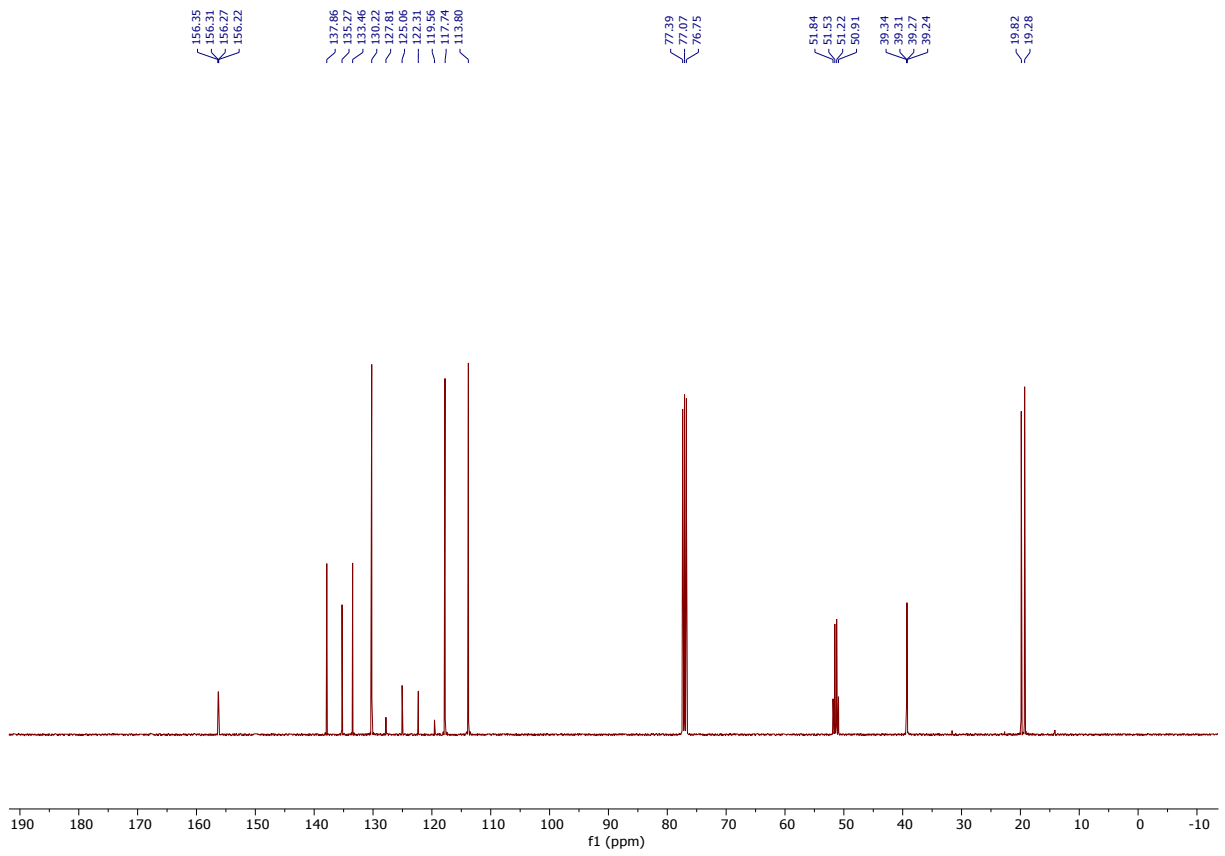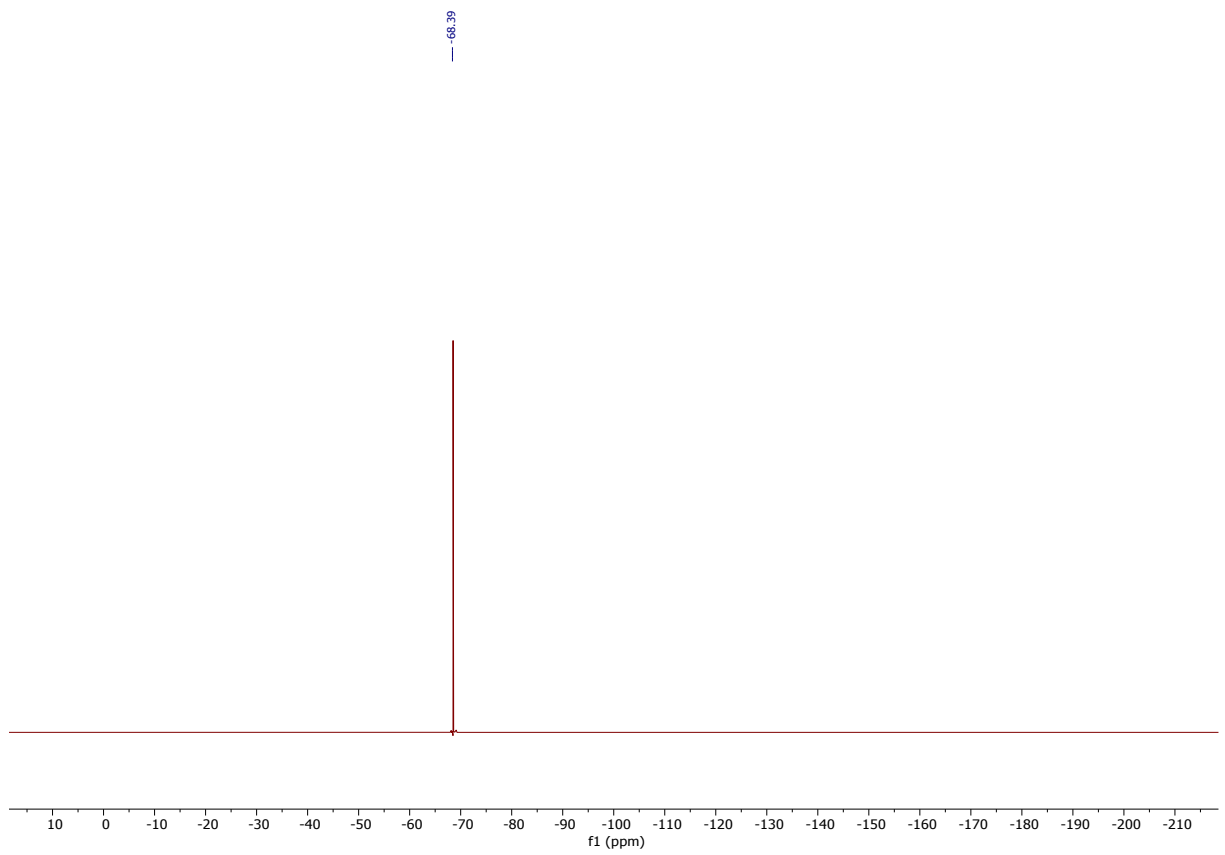

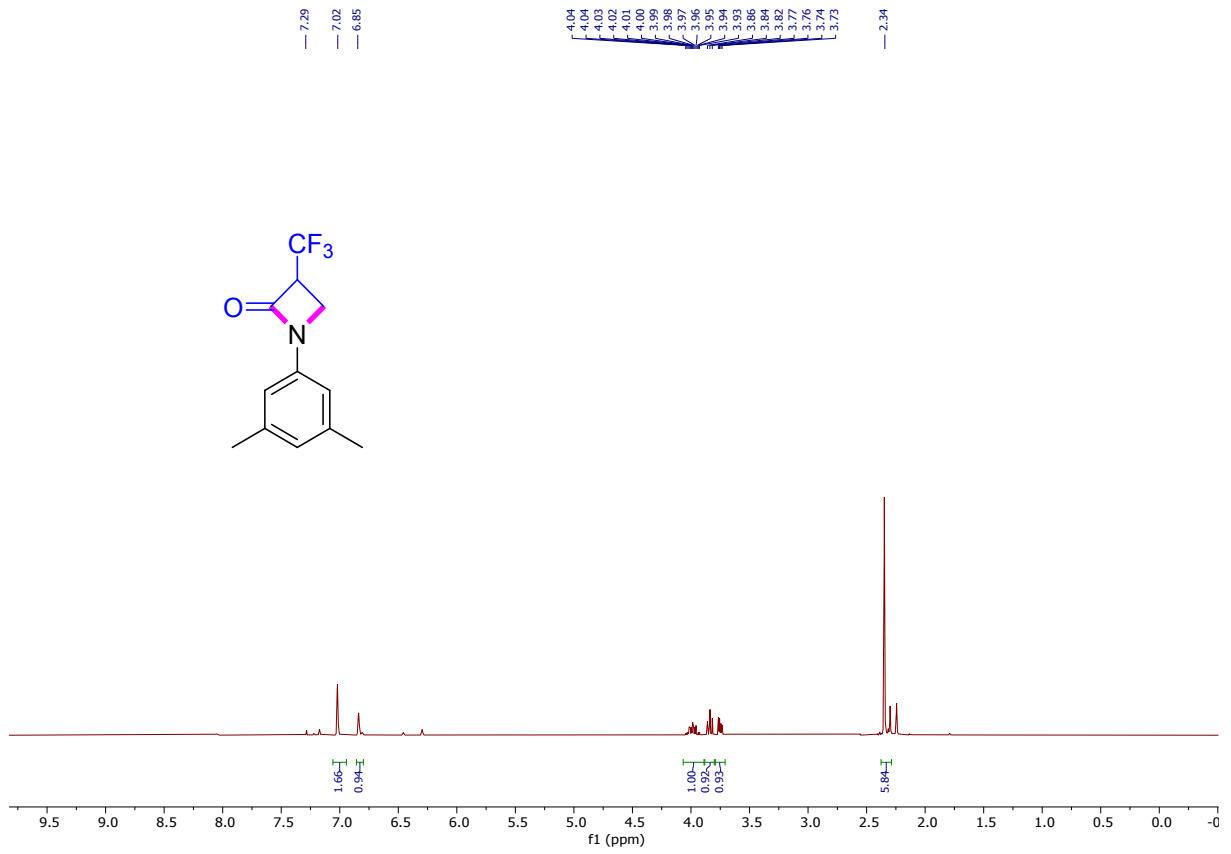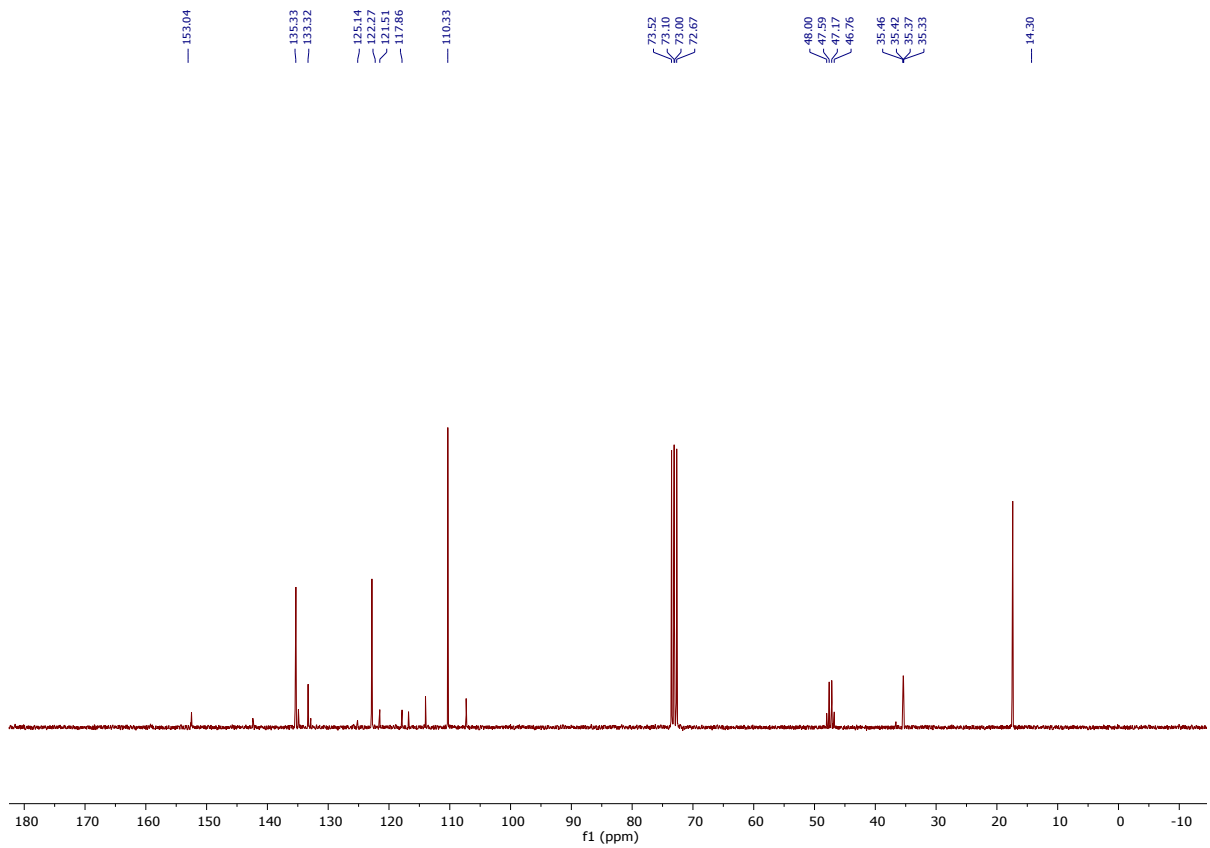

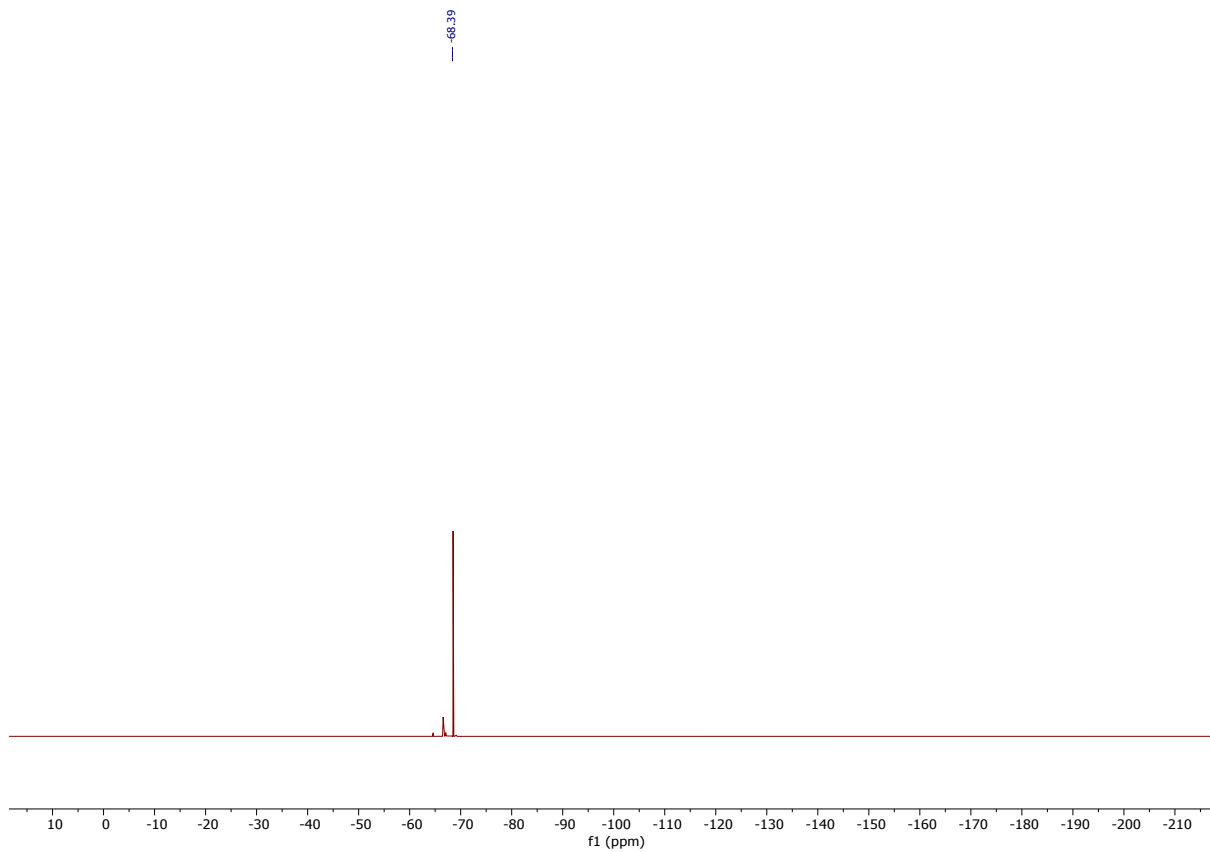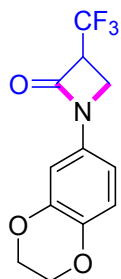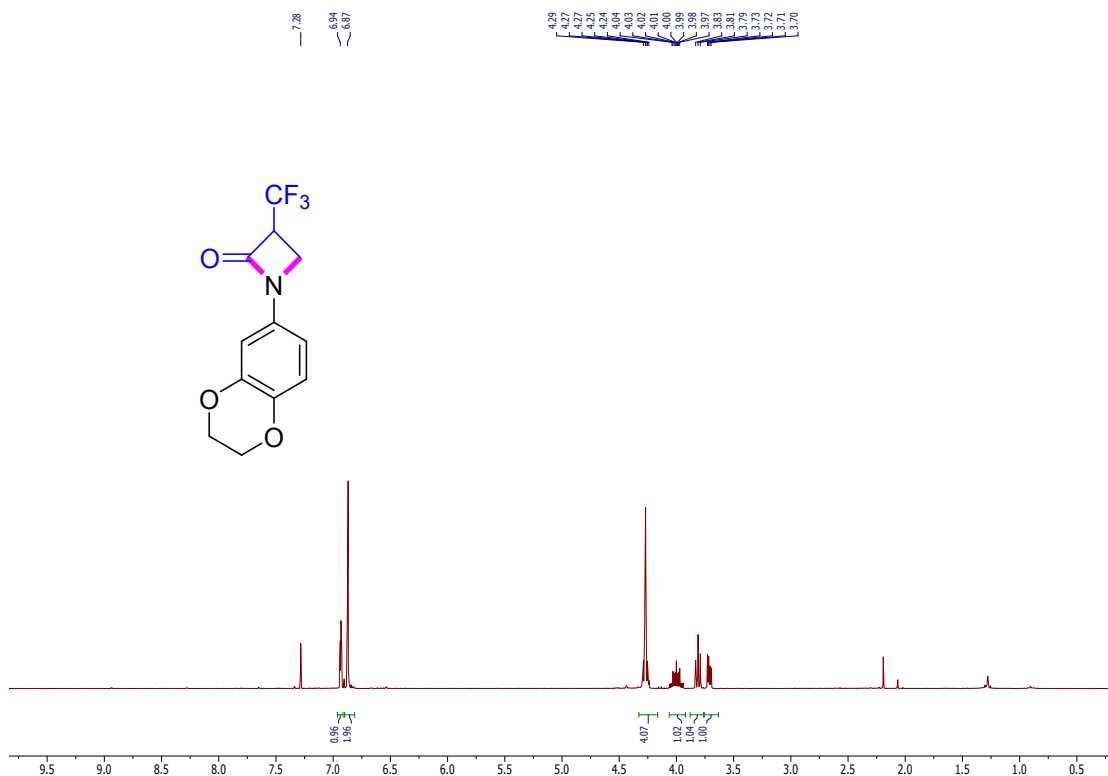

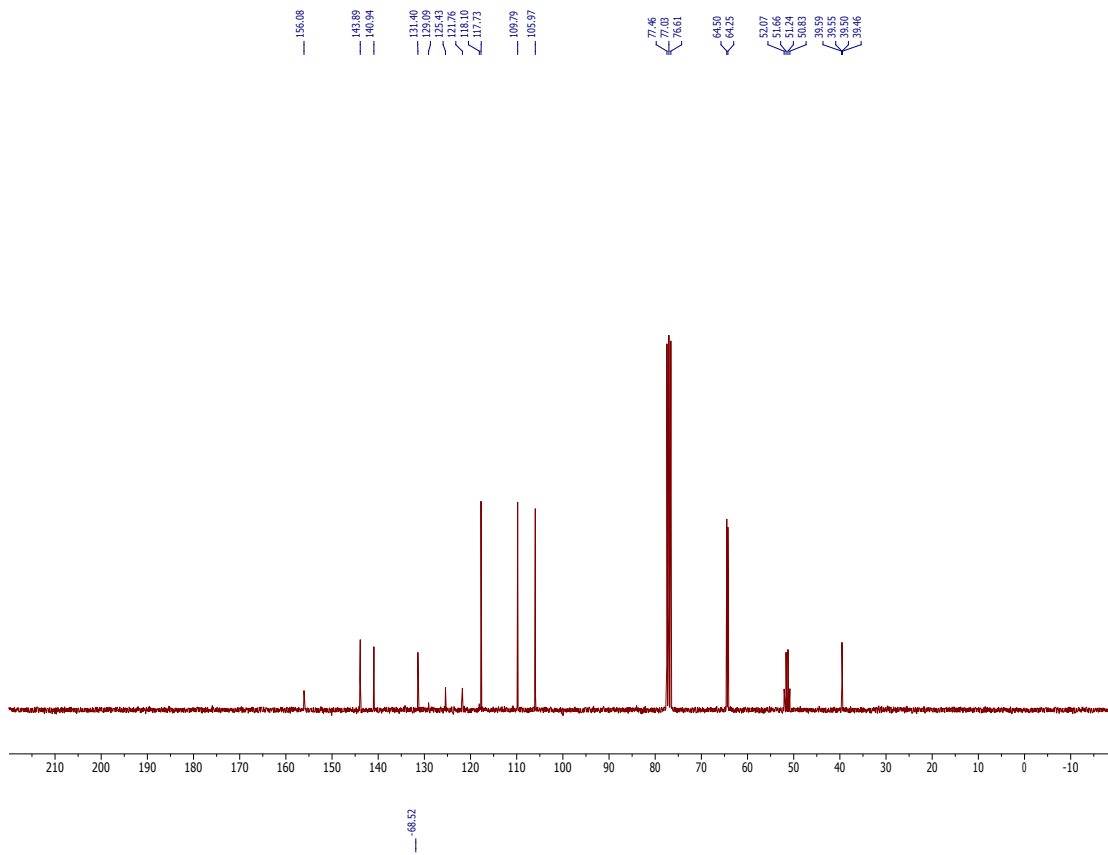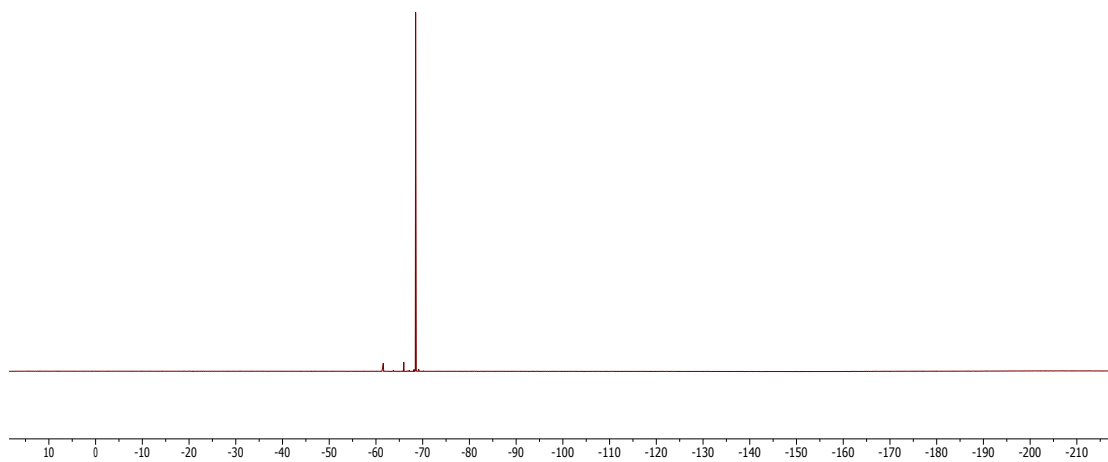

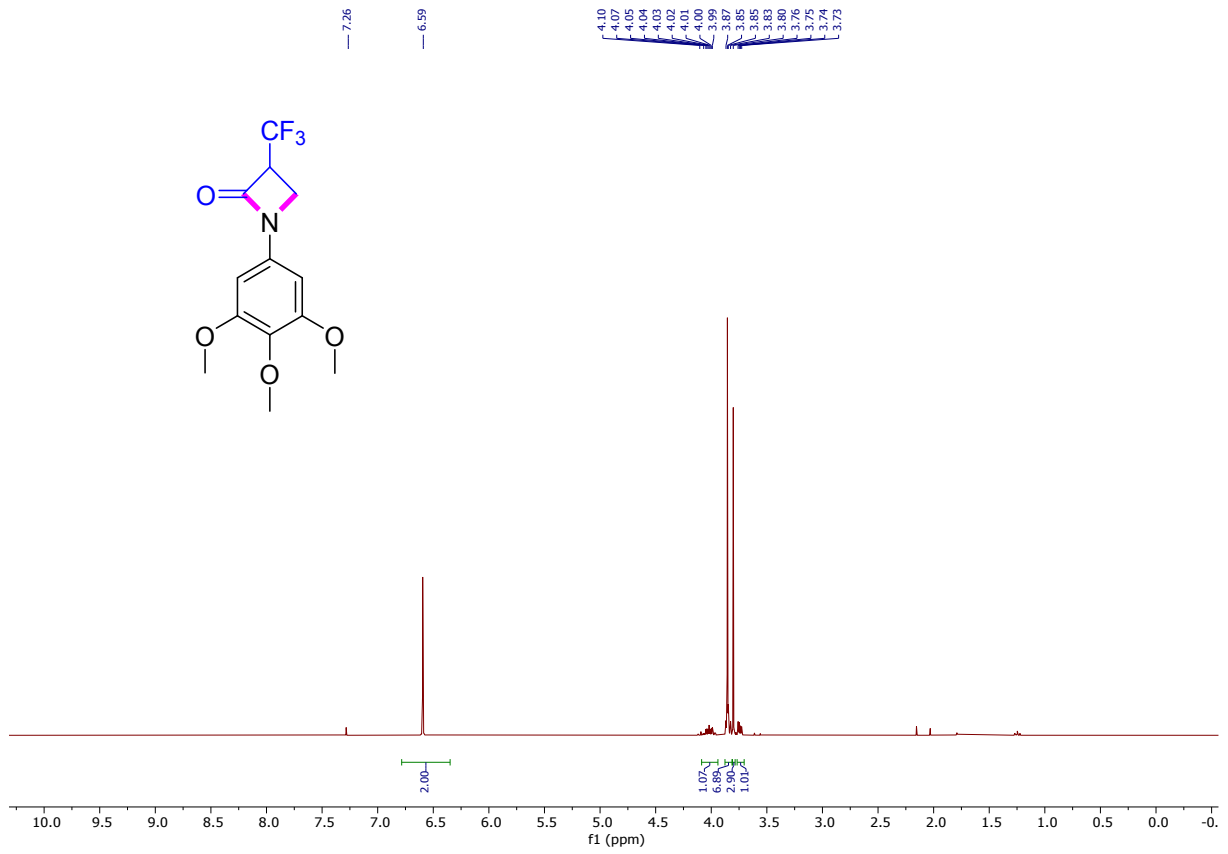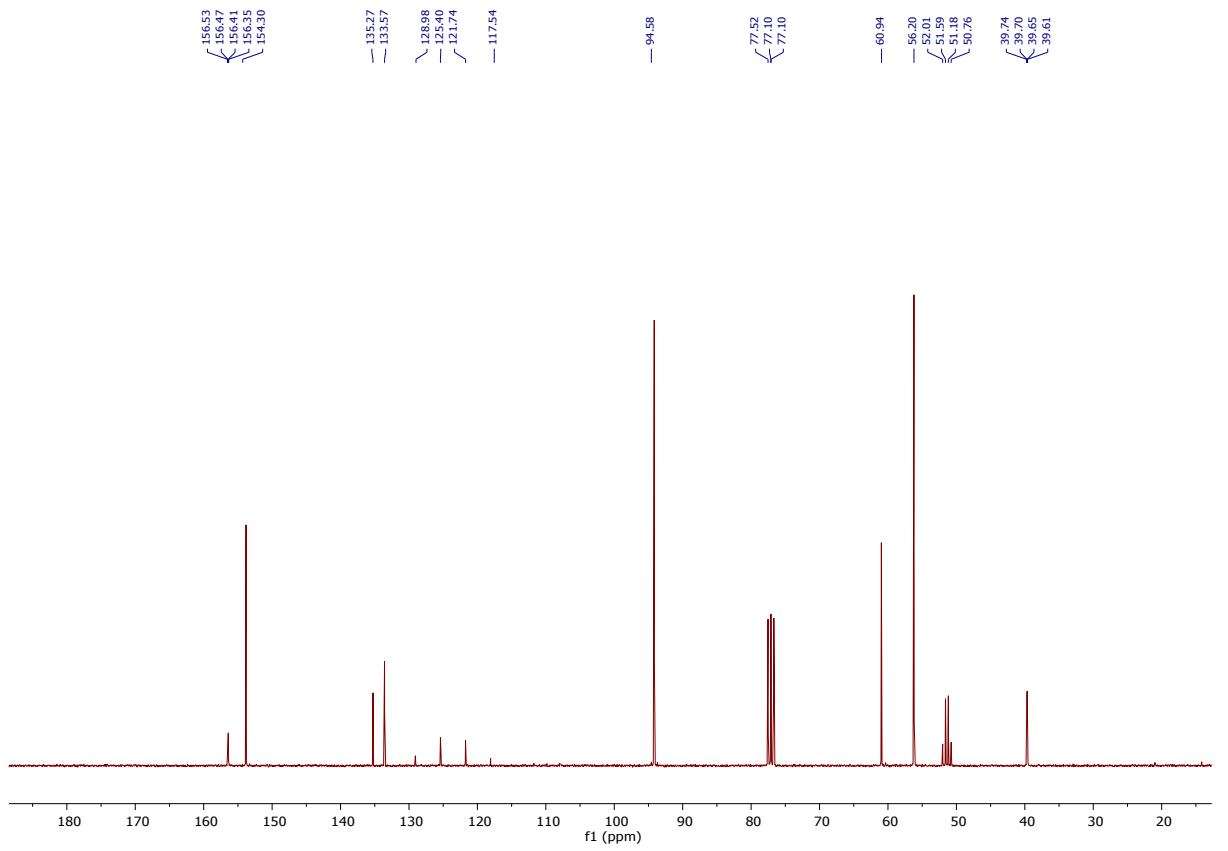

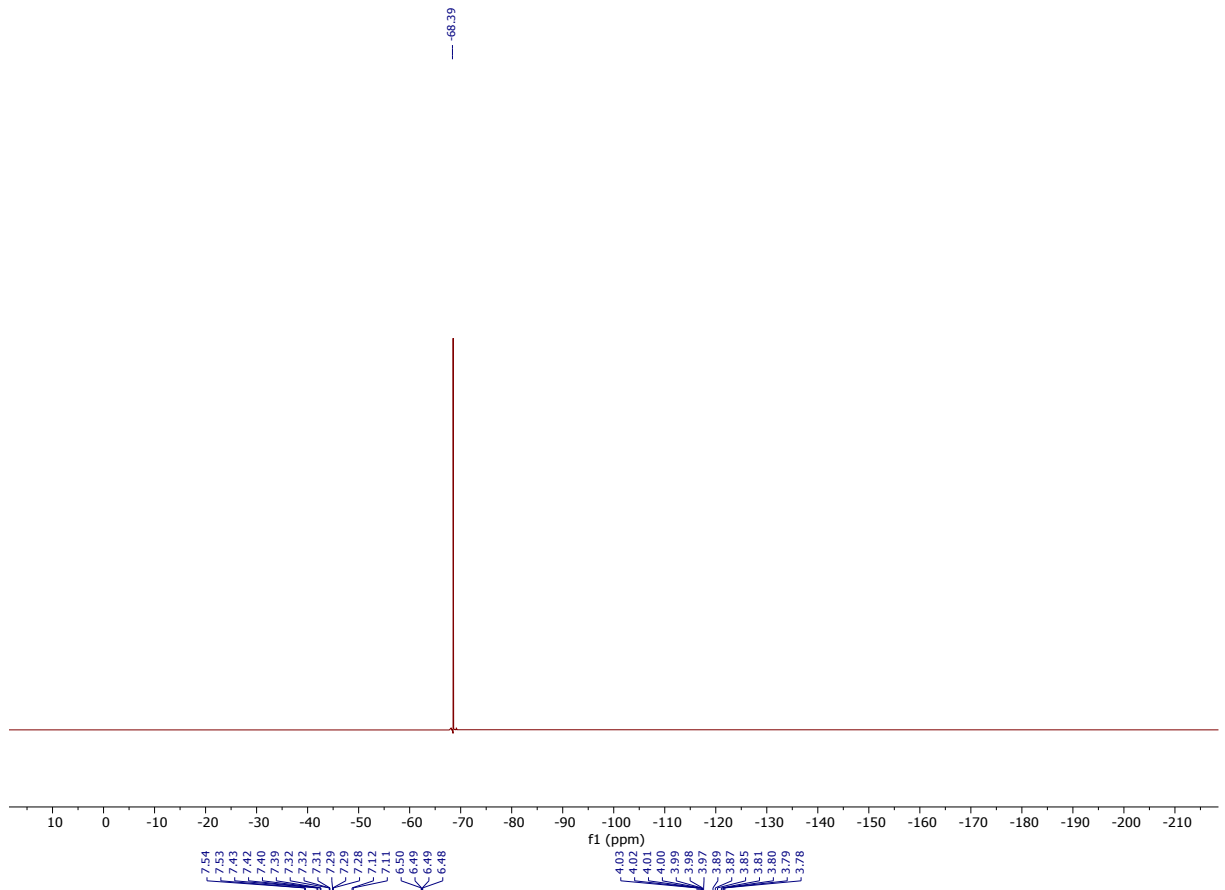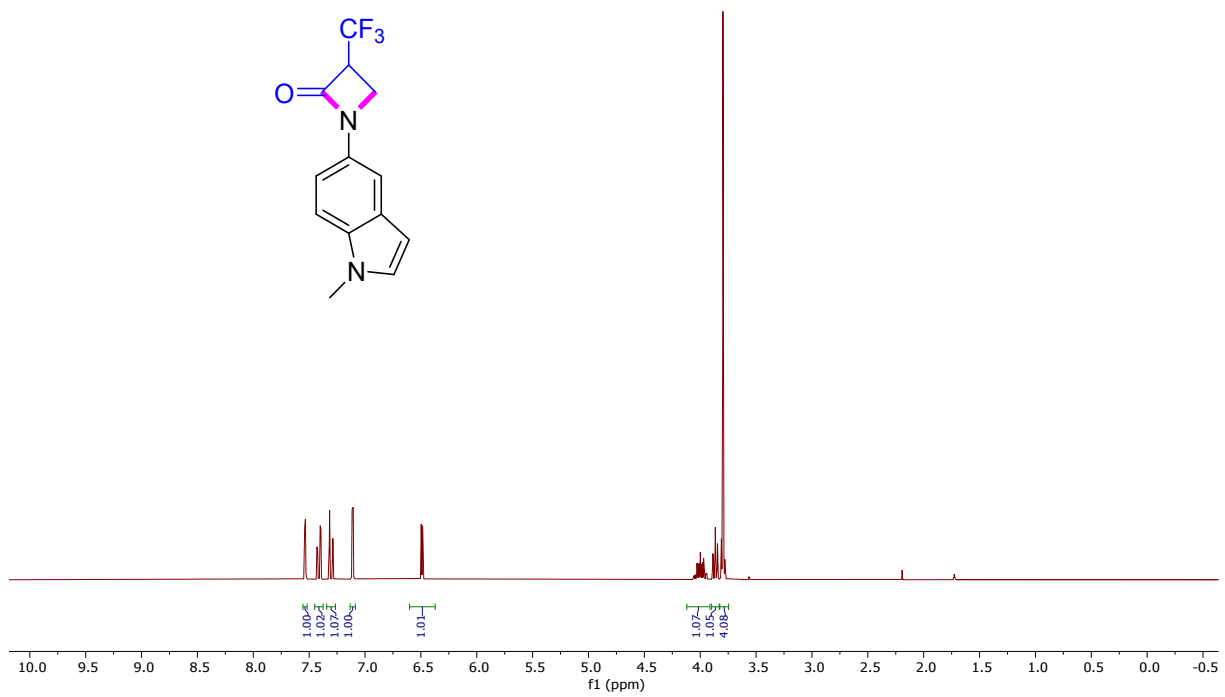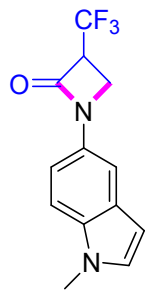

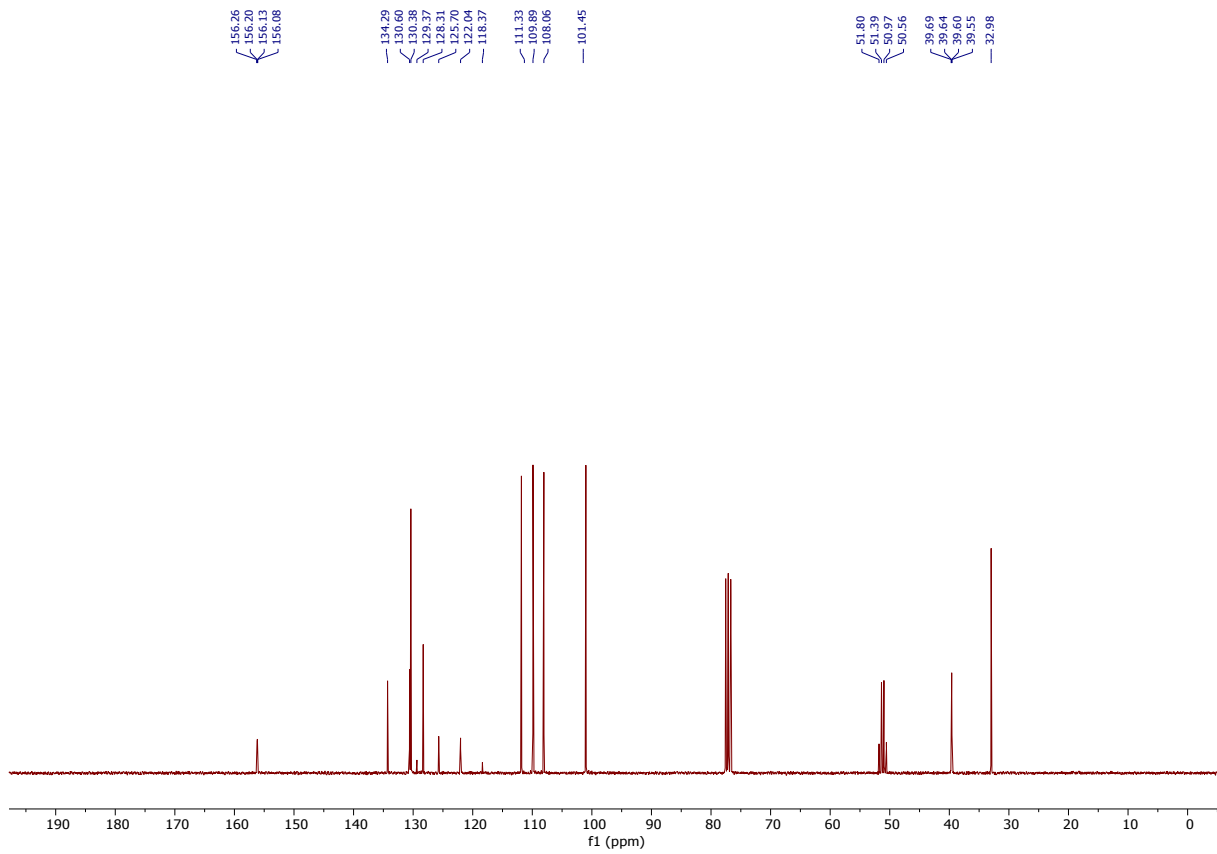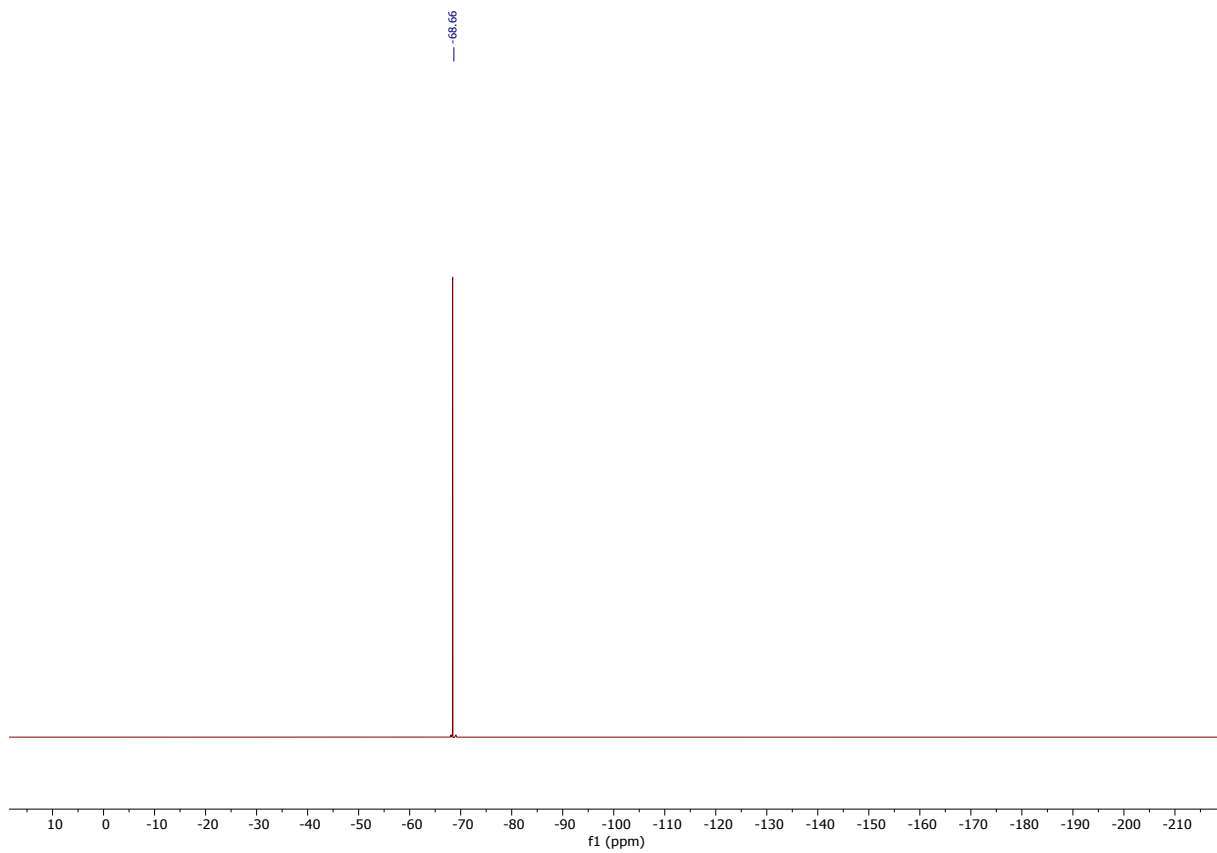



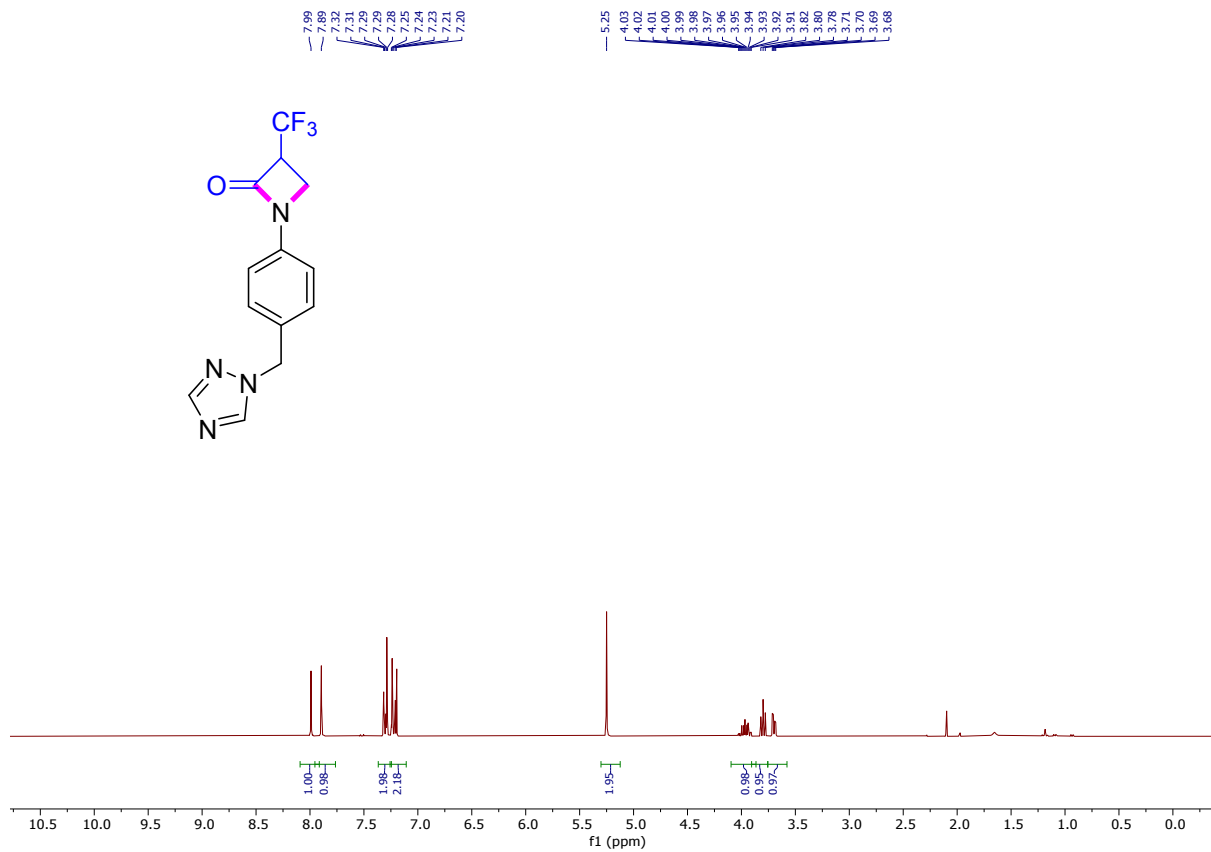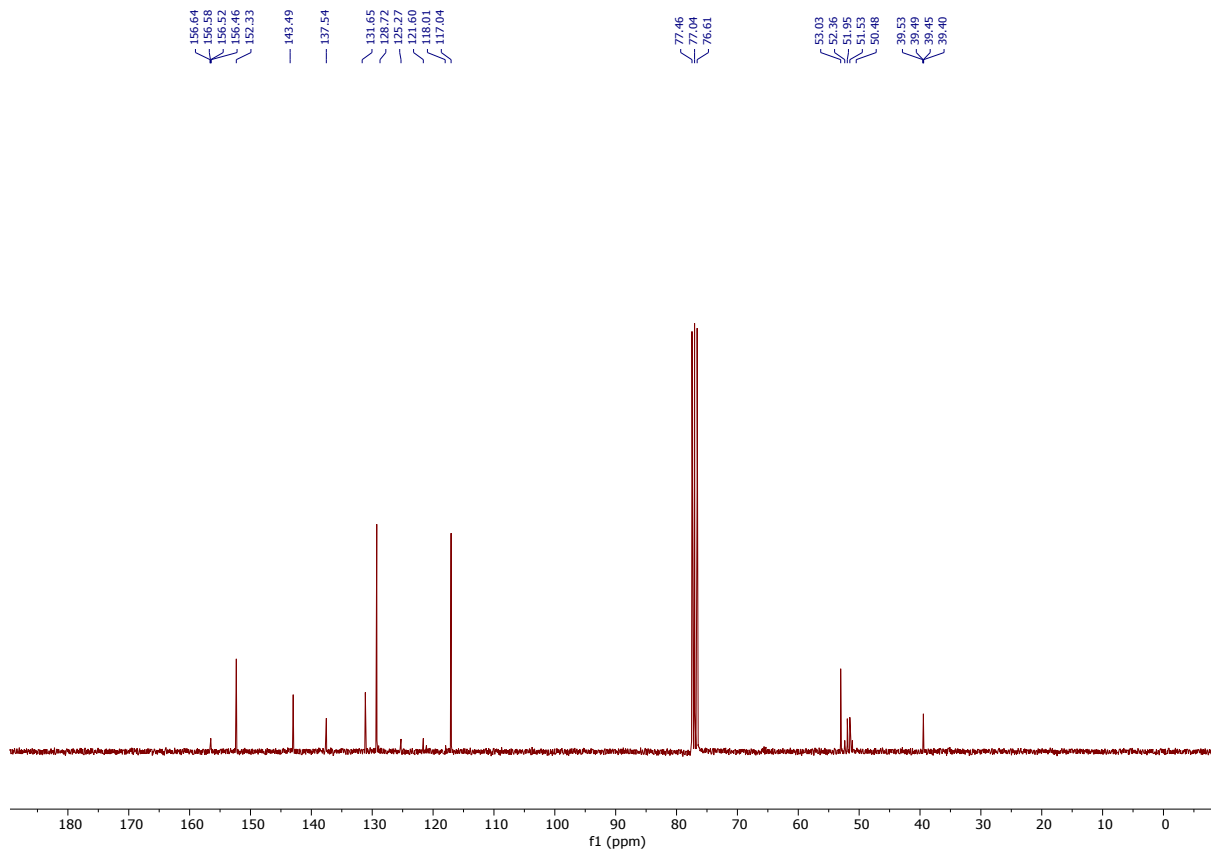

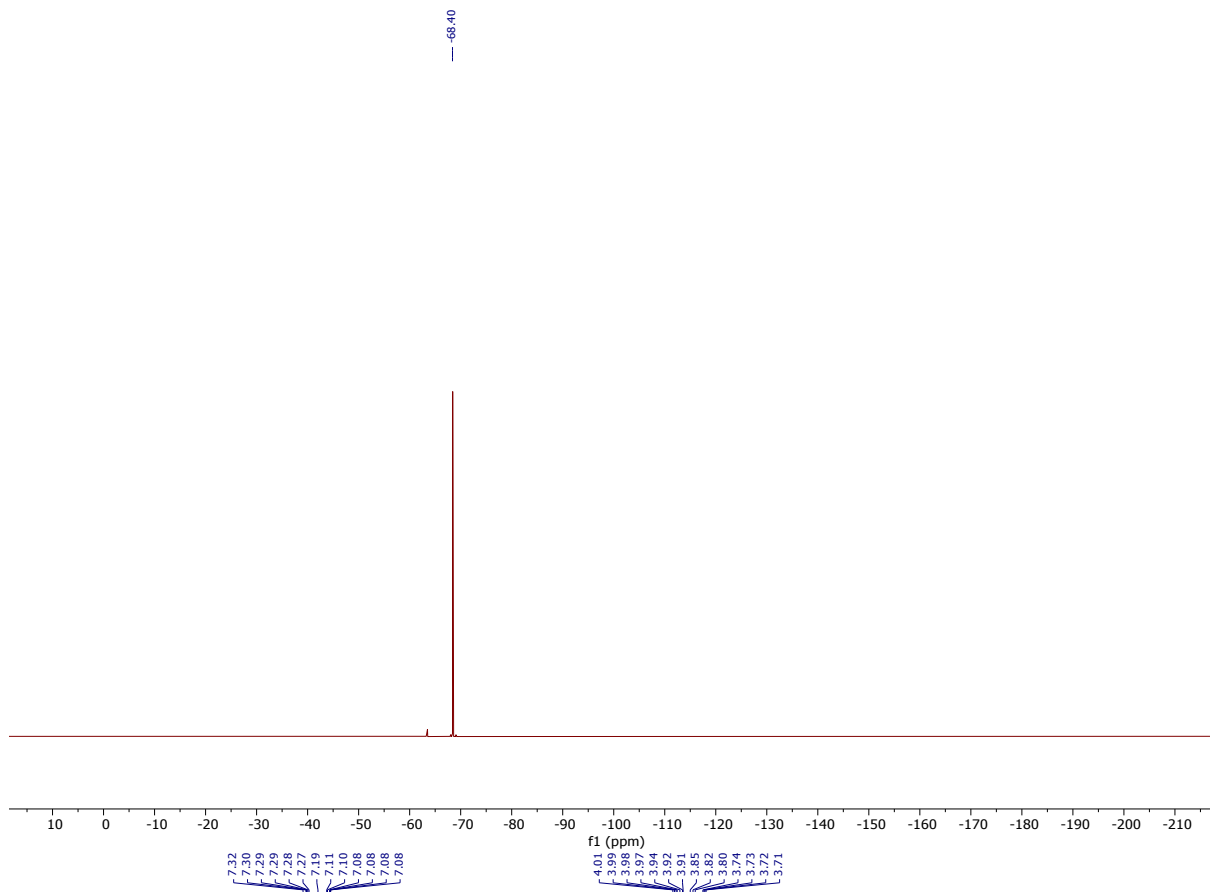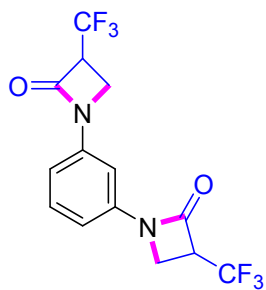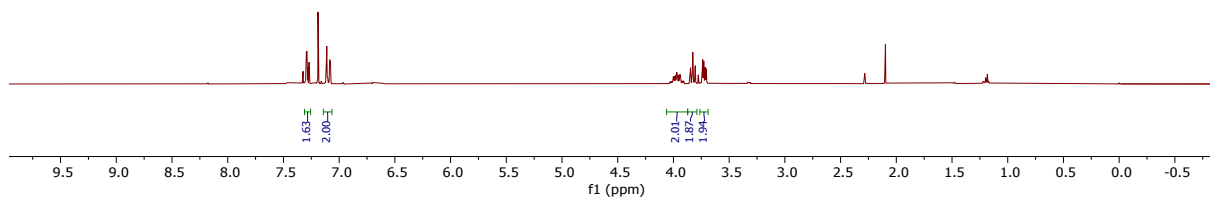

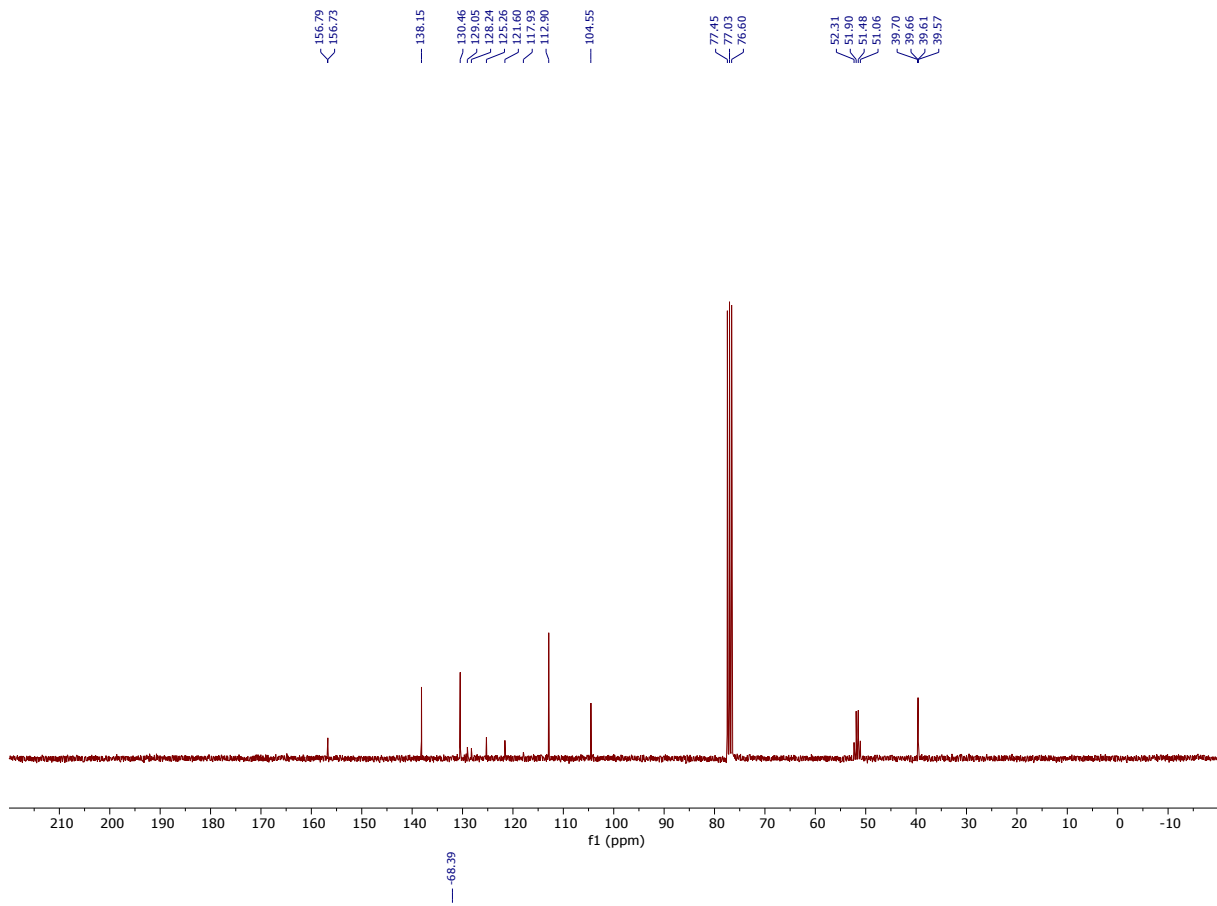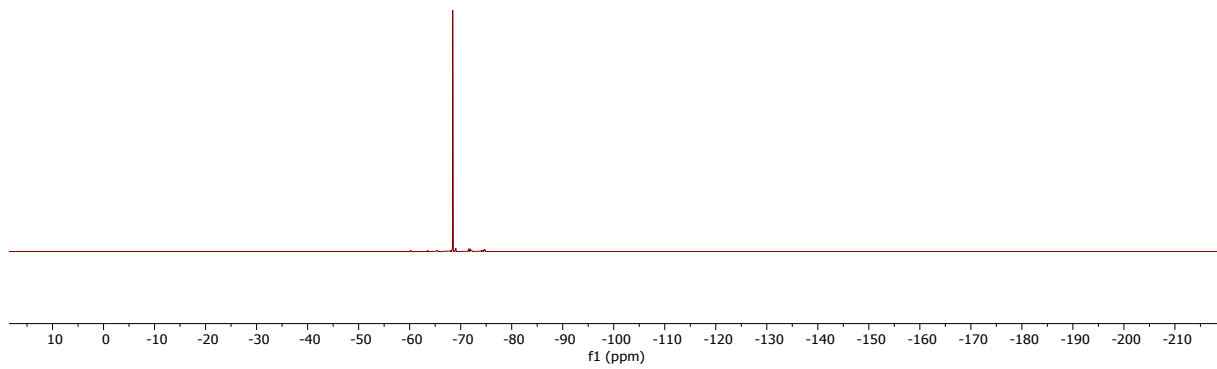

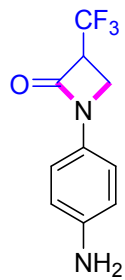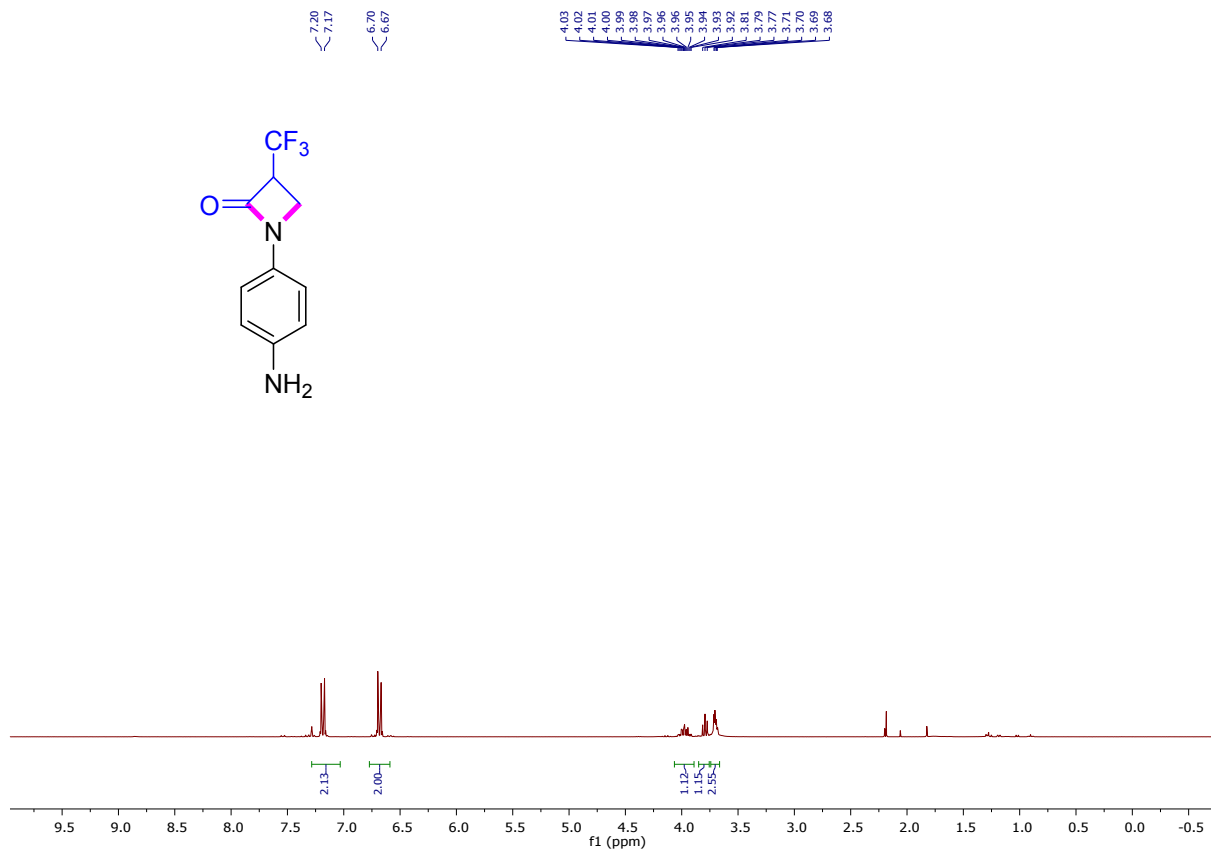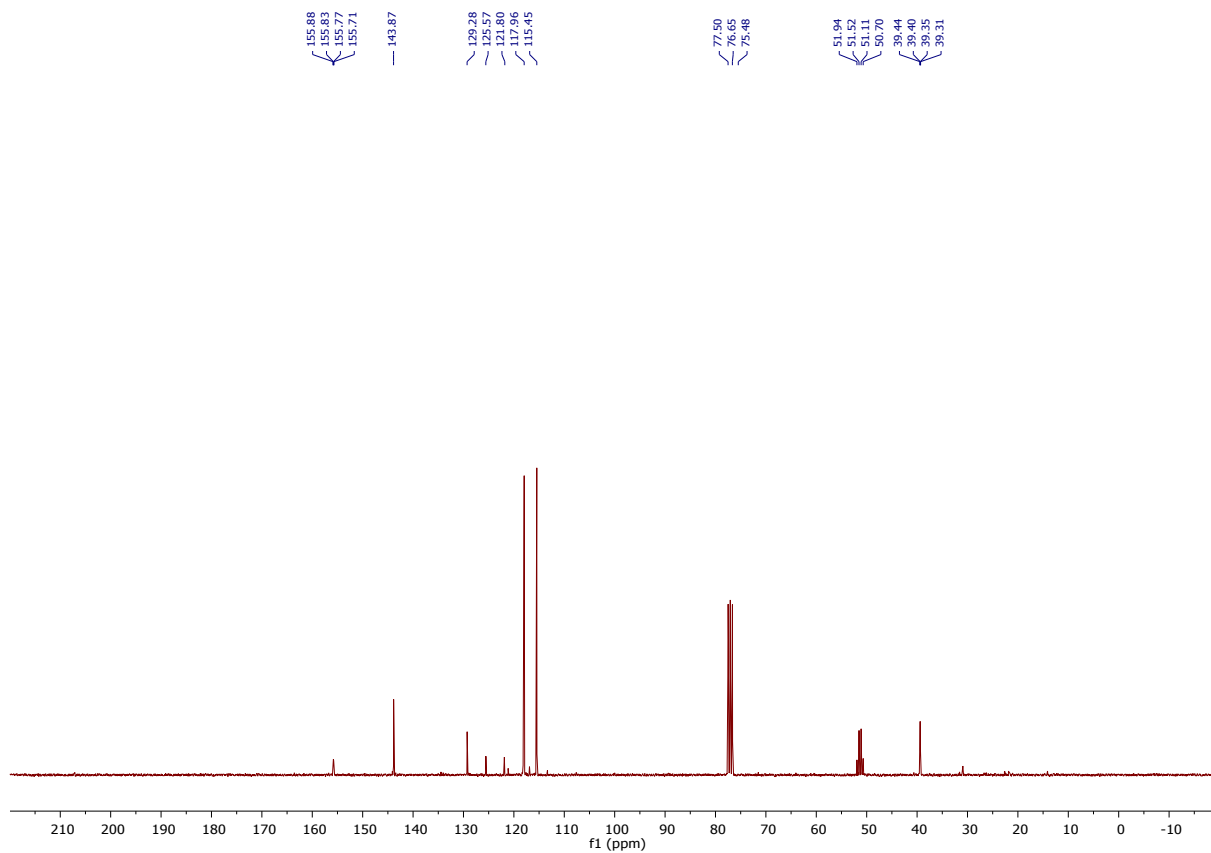

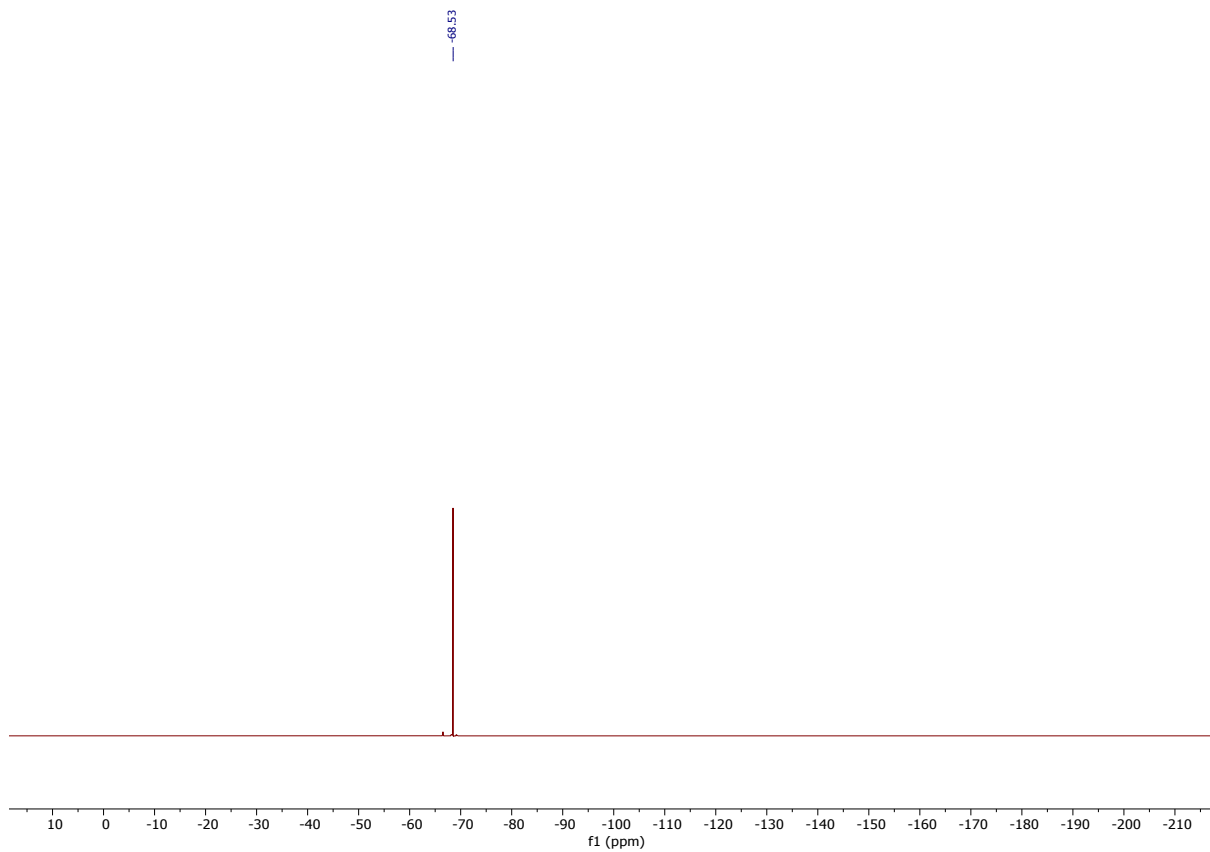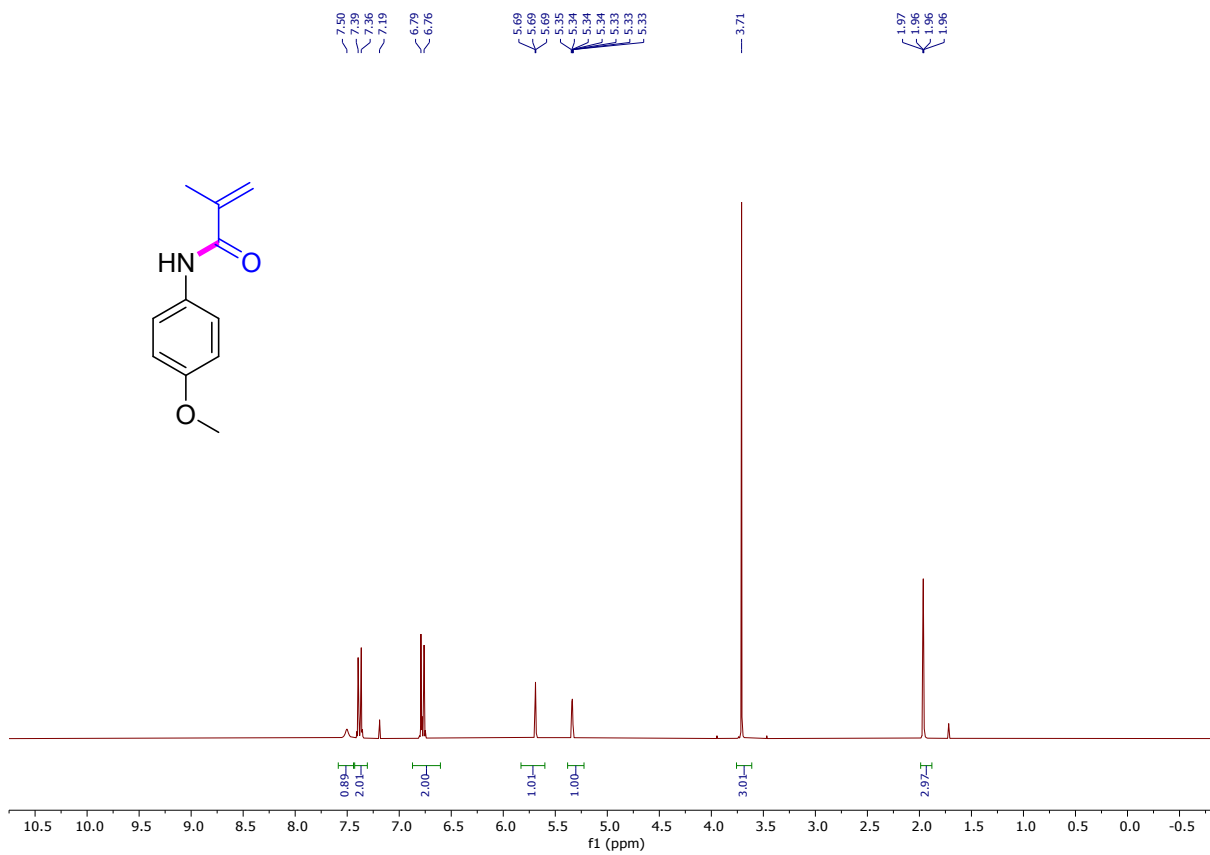

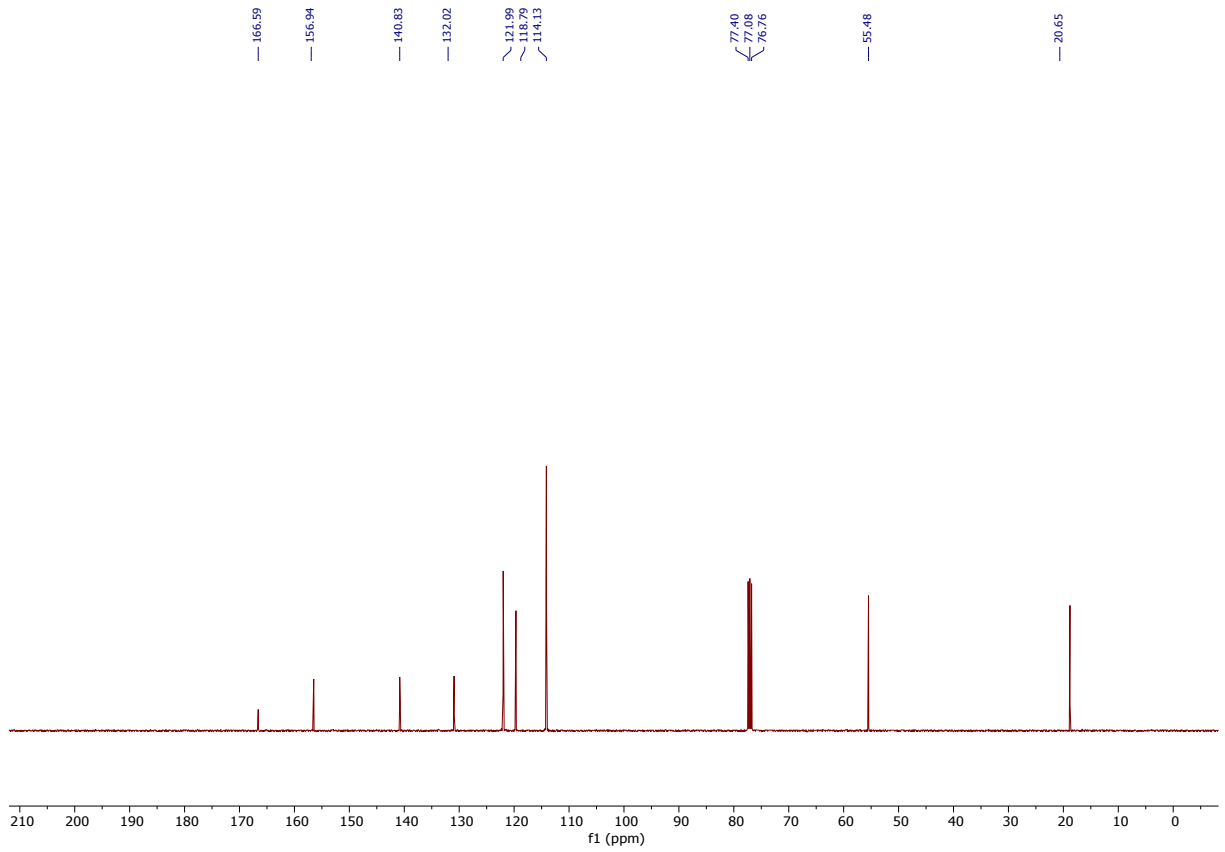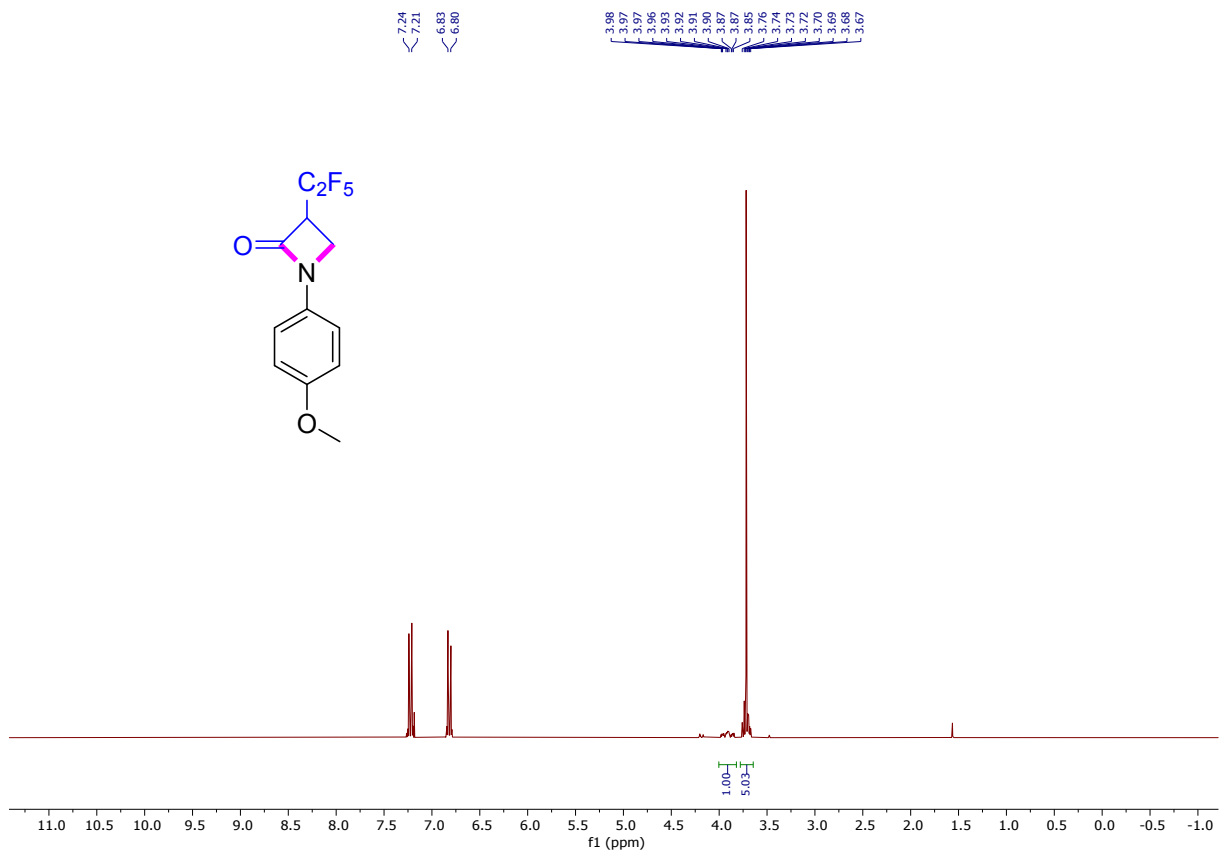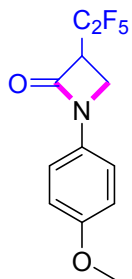

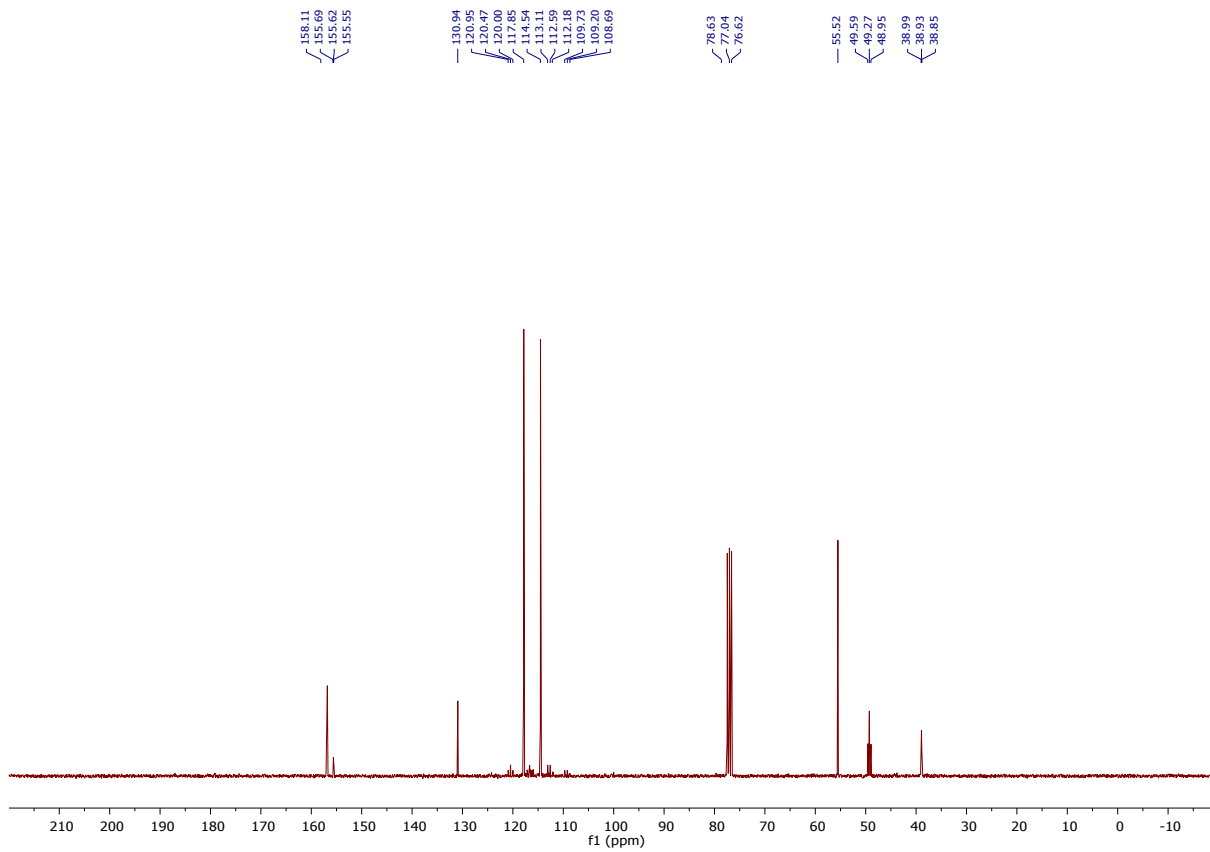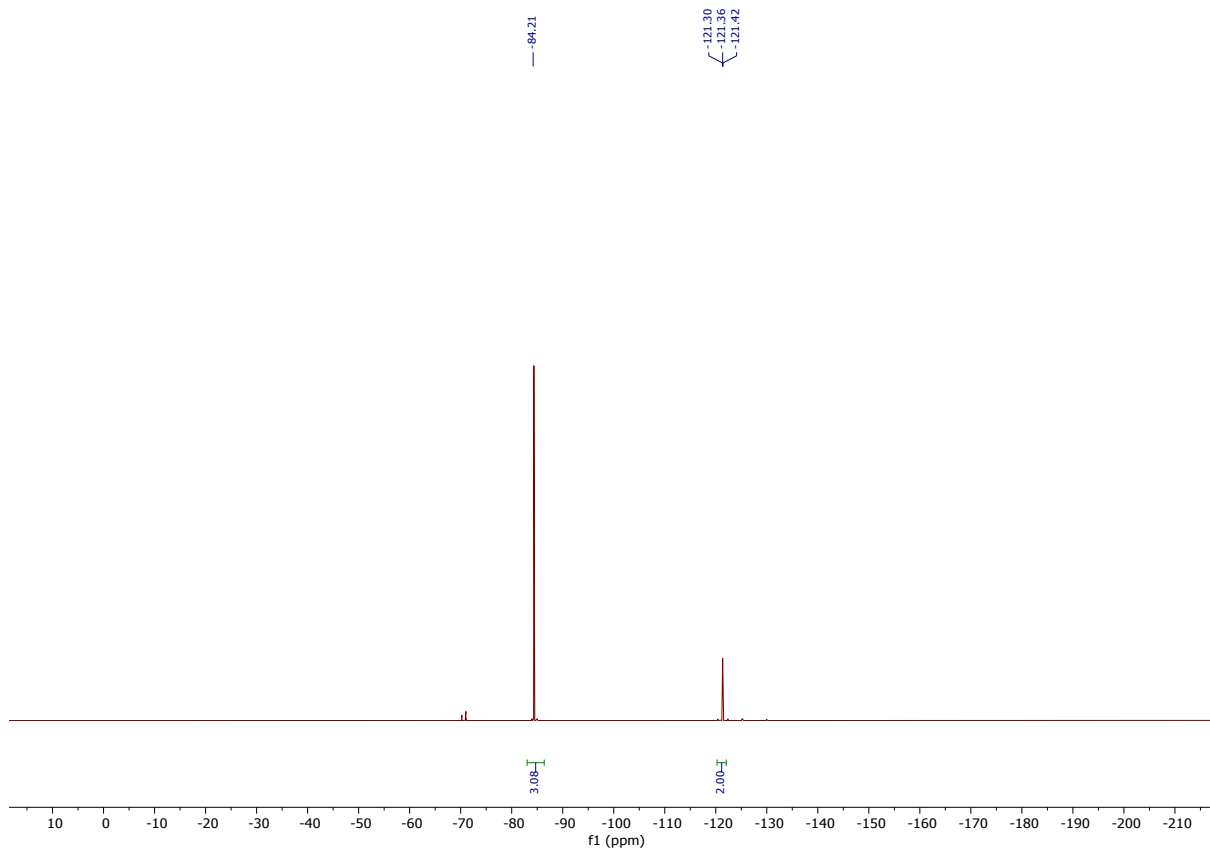

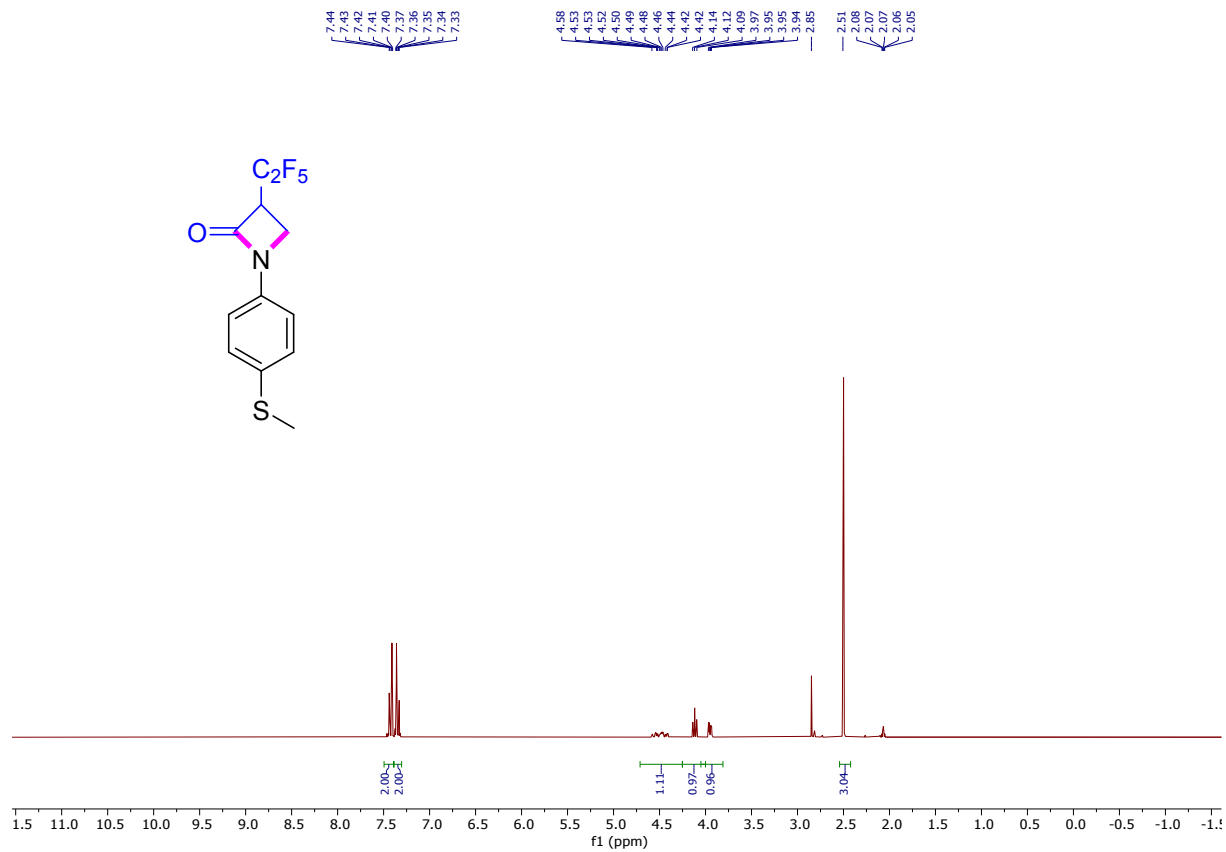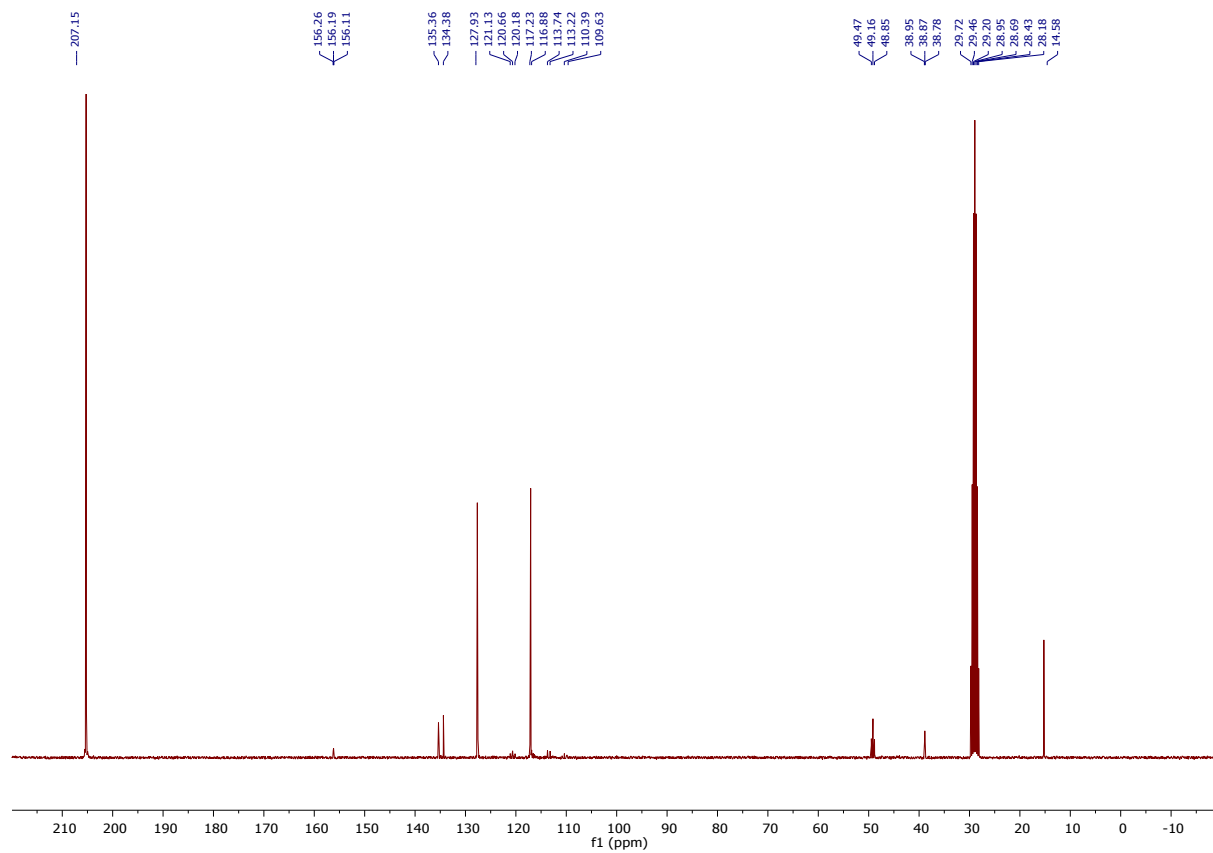



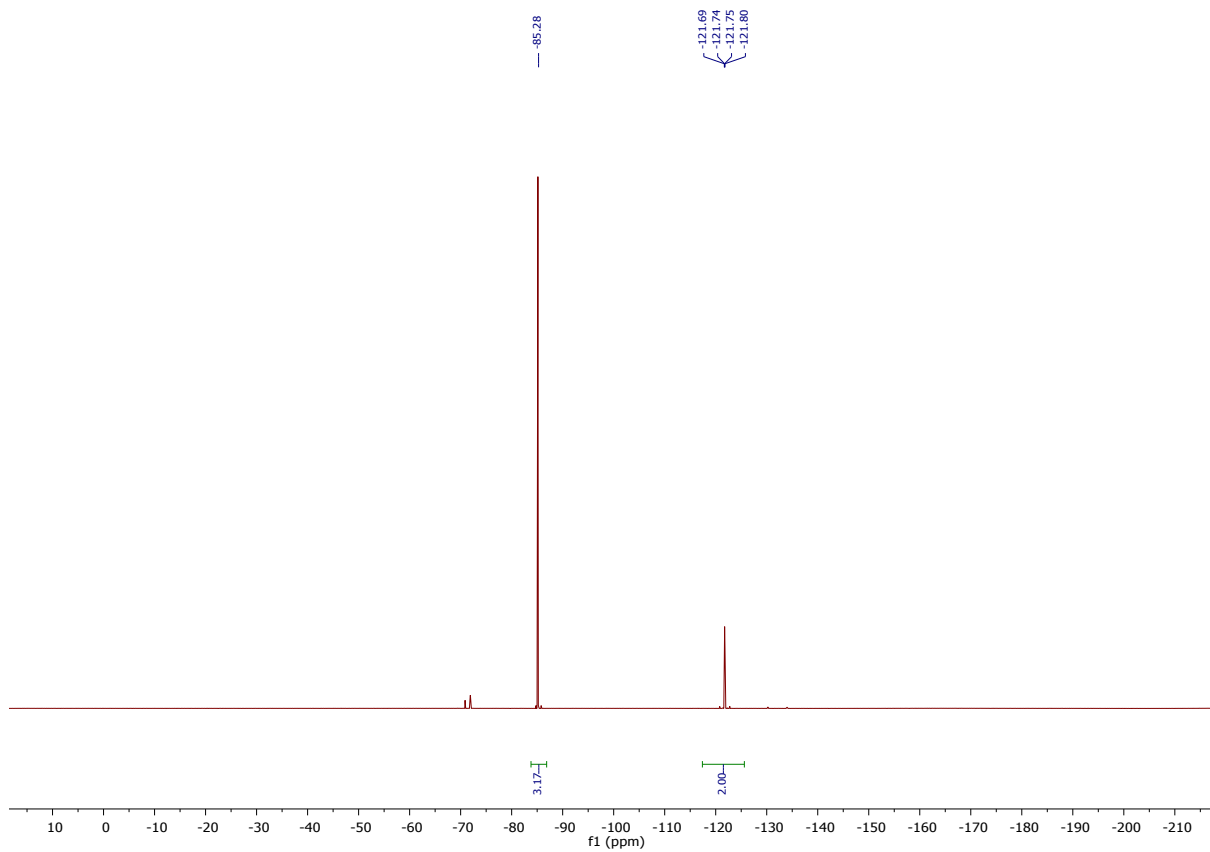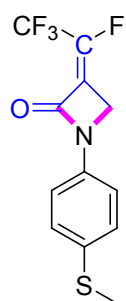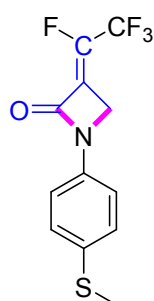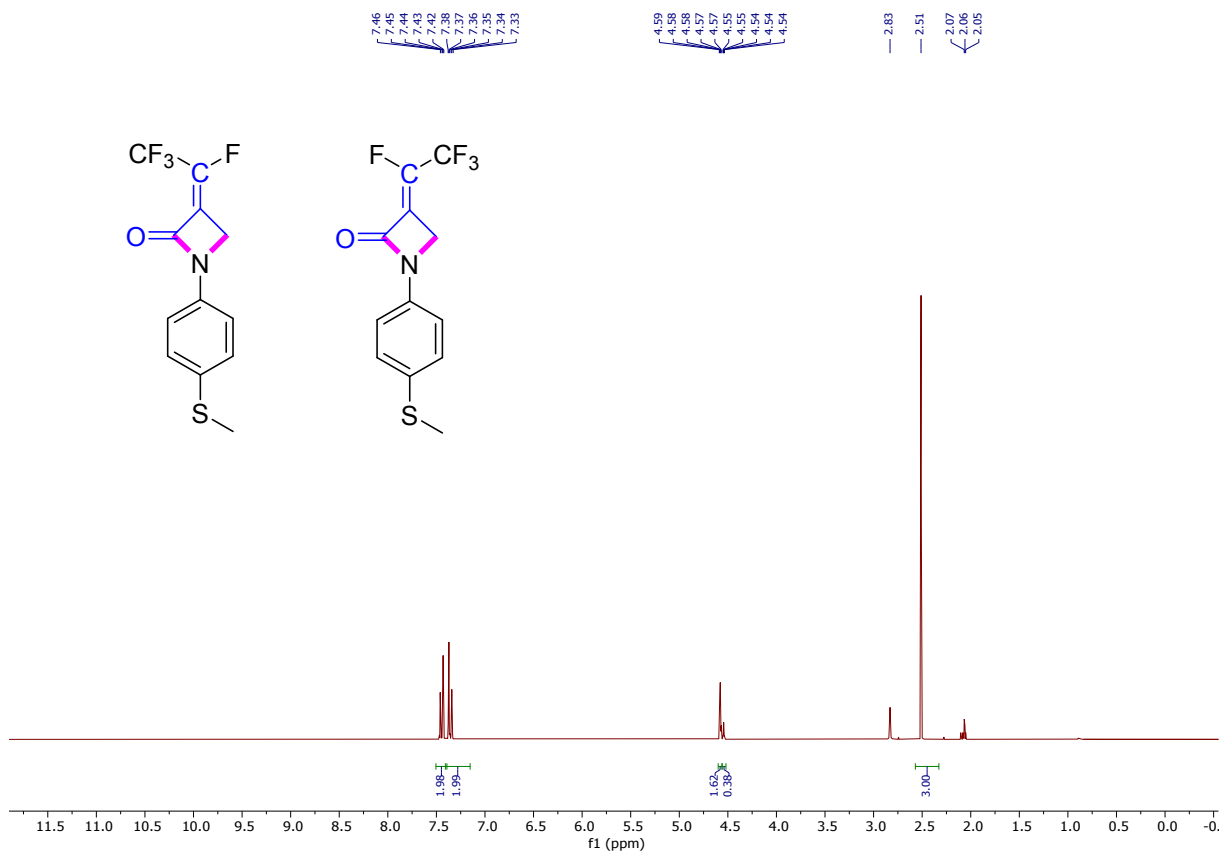

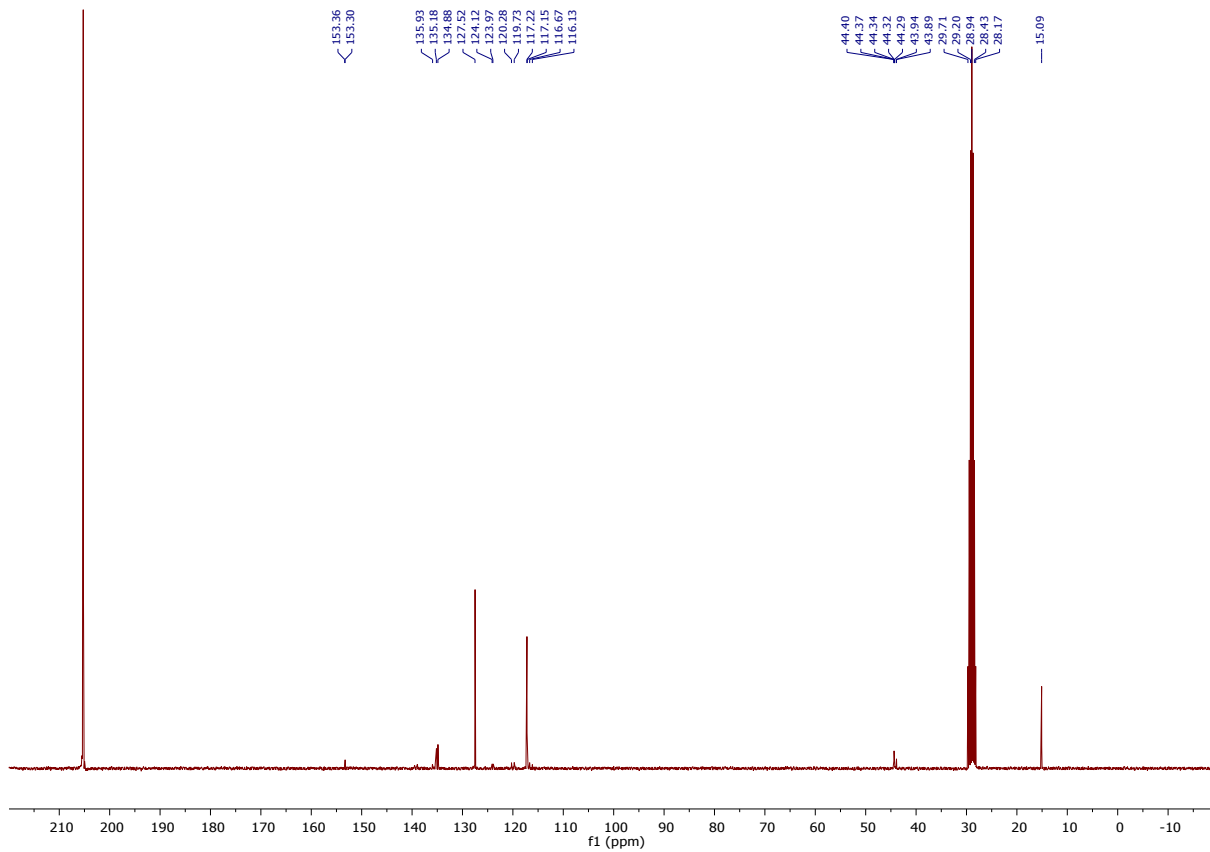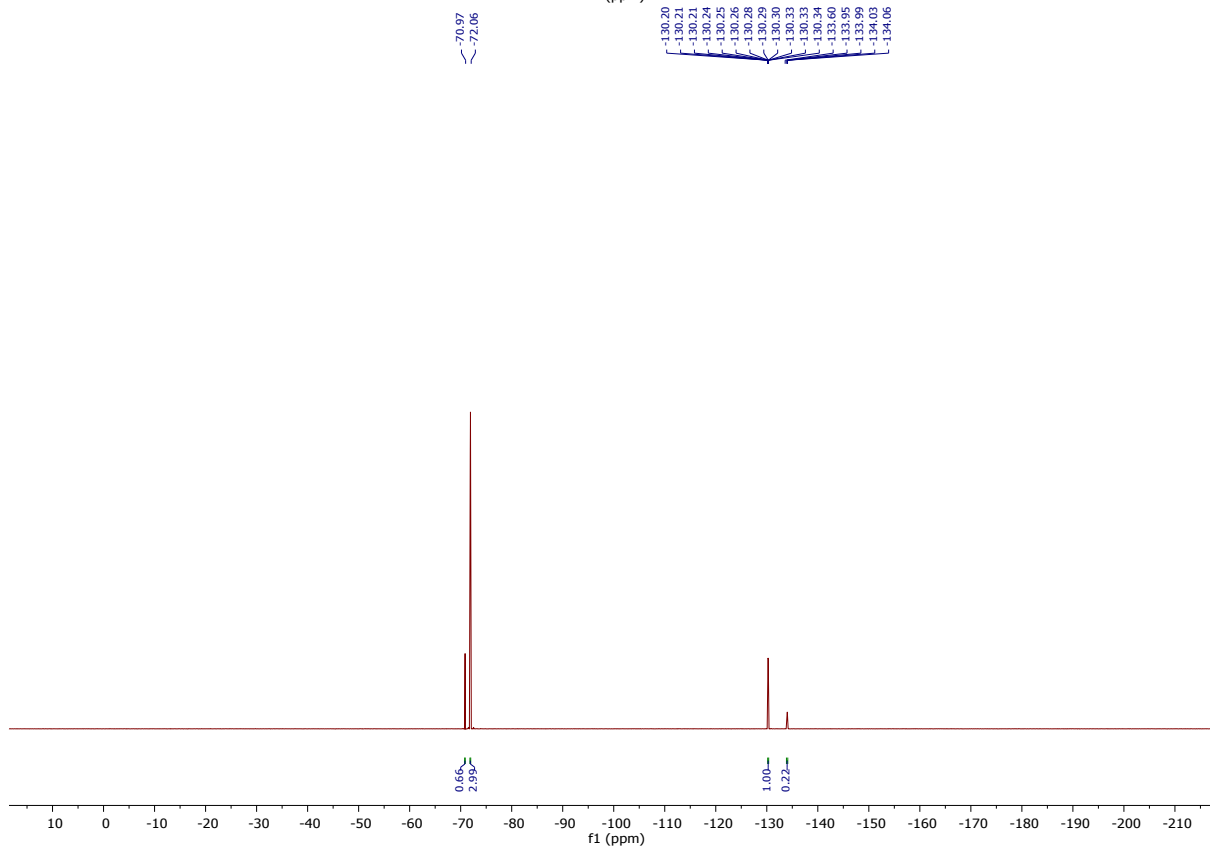

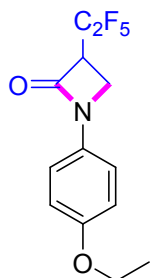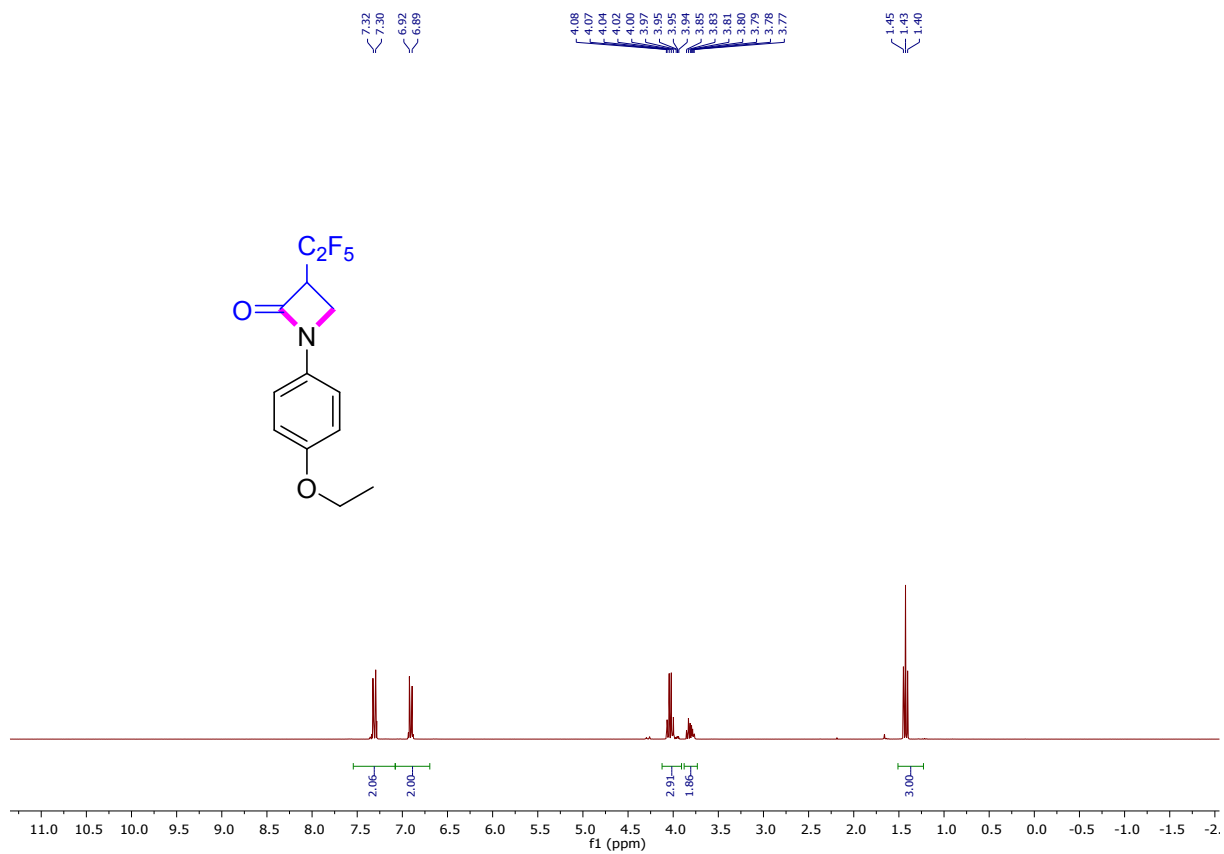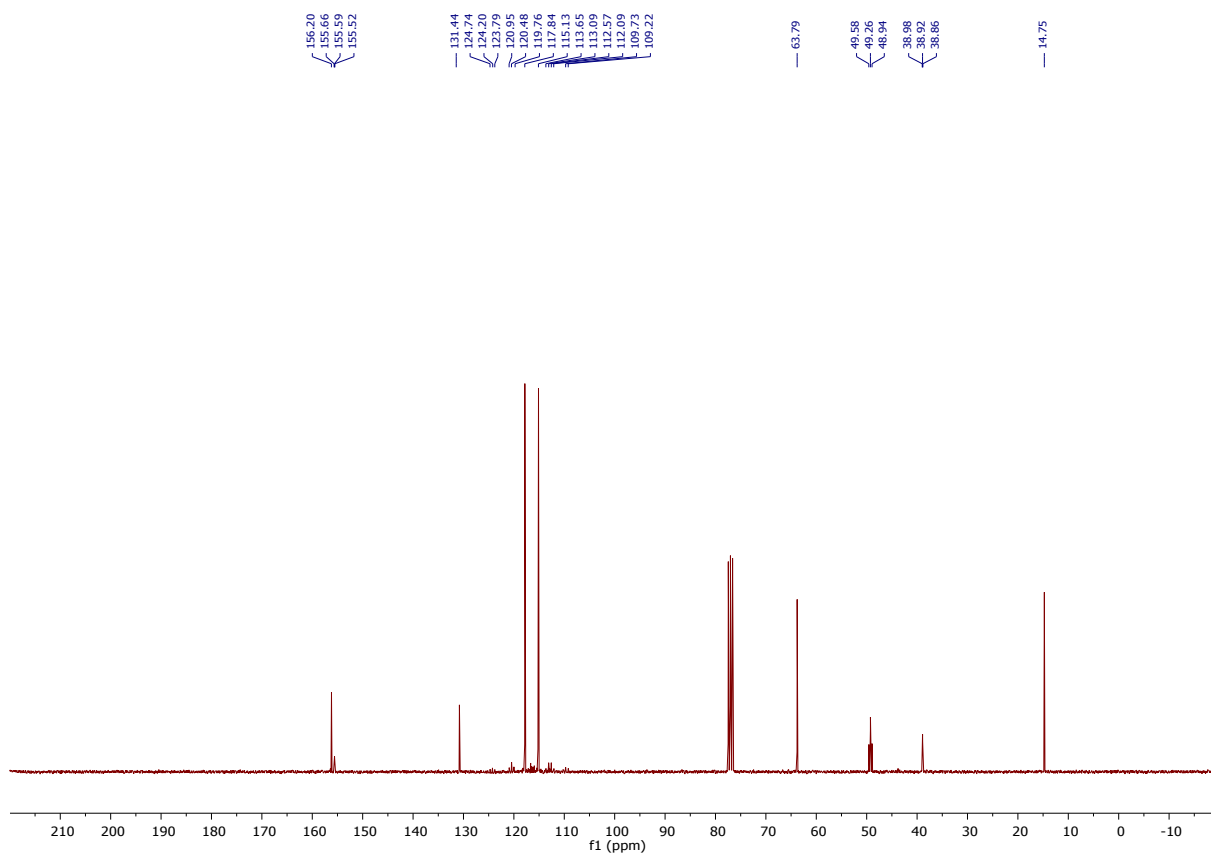

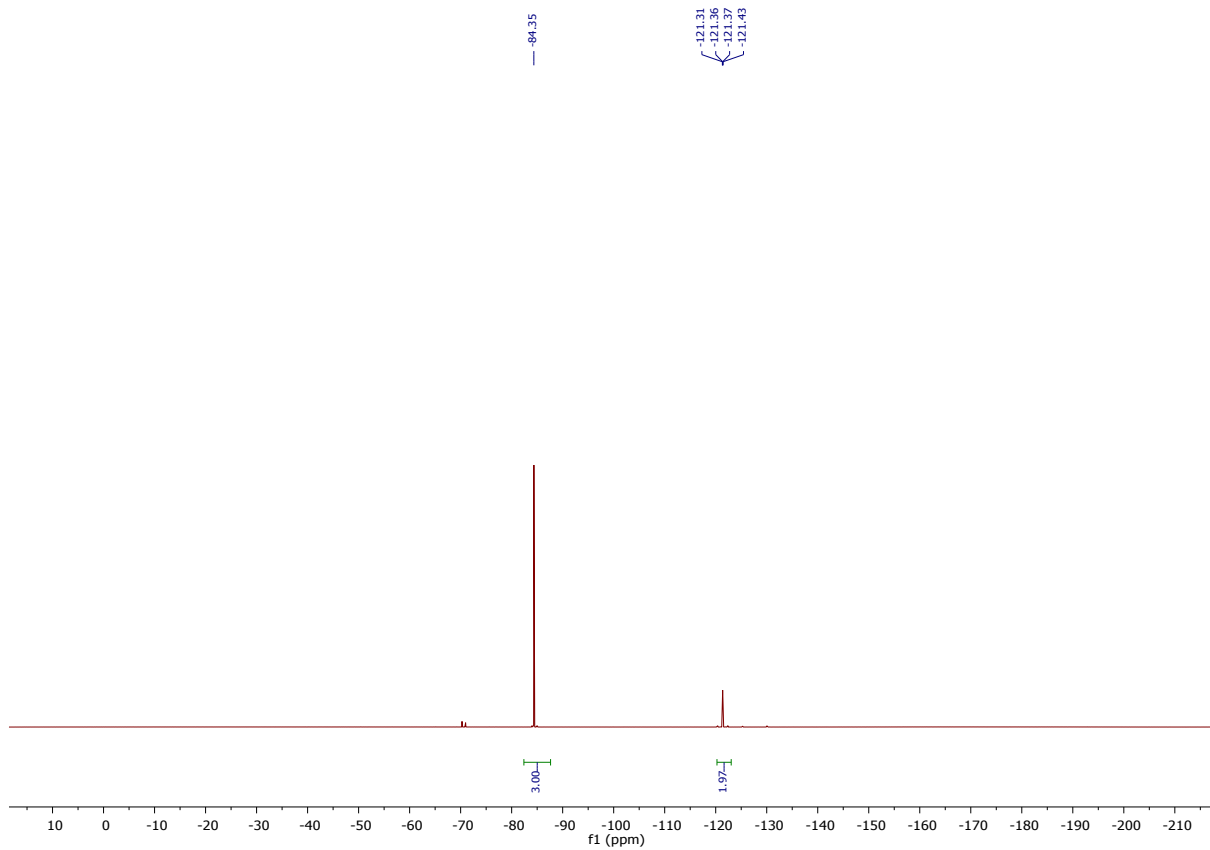

7.69  
7.66  
7.46  
7.43  
7.25

4.16  
4.15  
4.14  
4.13  
4.11  
4.09  
4.07  
4.05  
4.04  
3.95  
3.93  
3.91  
3.89  
3.88  
3.86

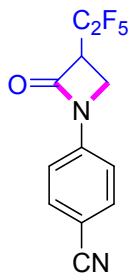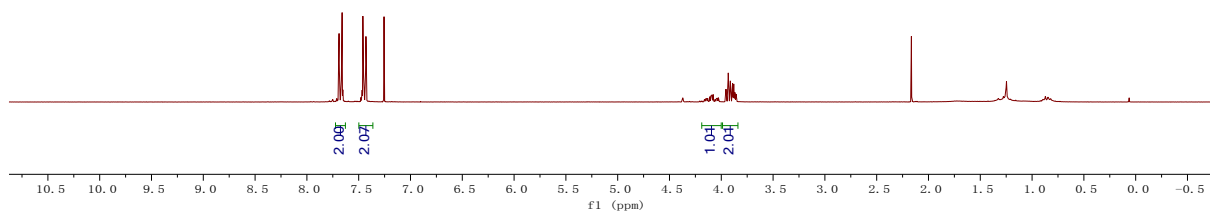

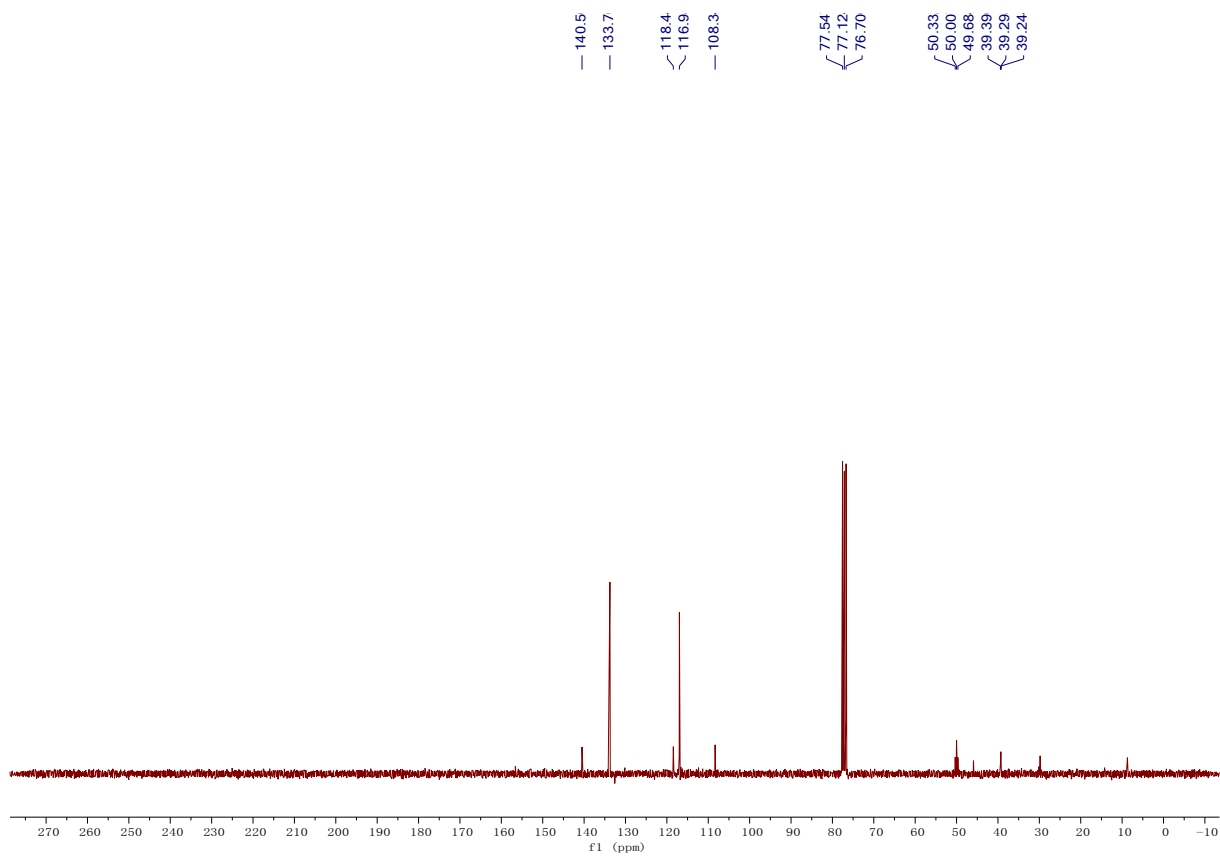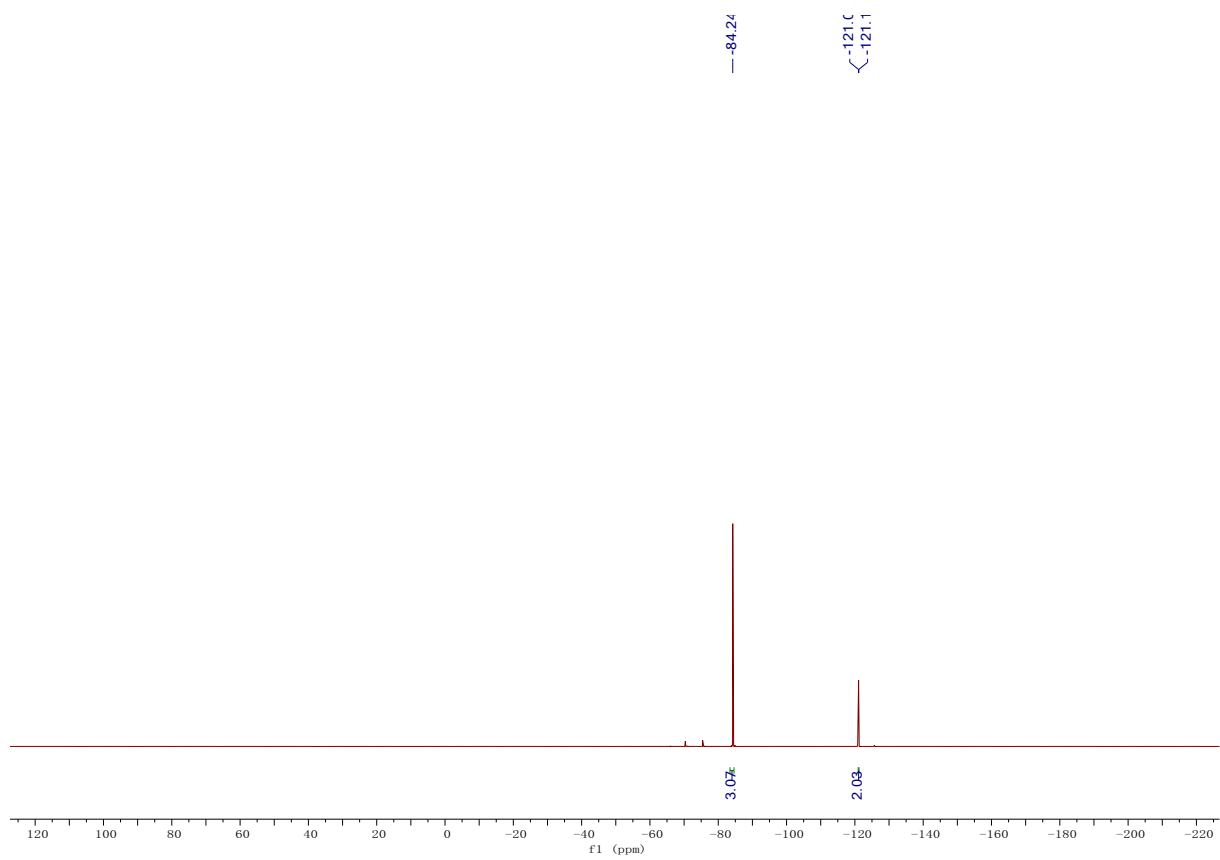

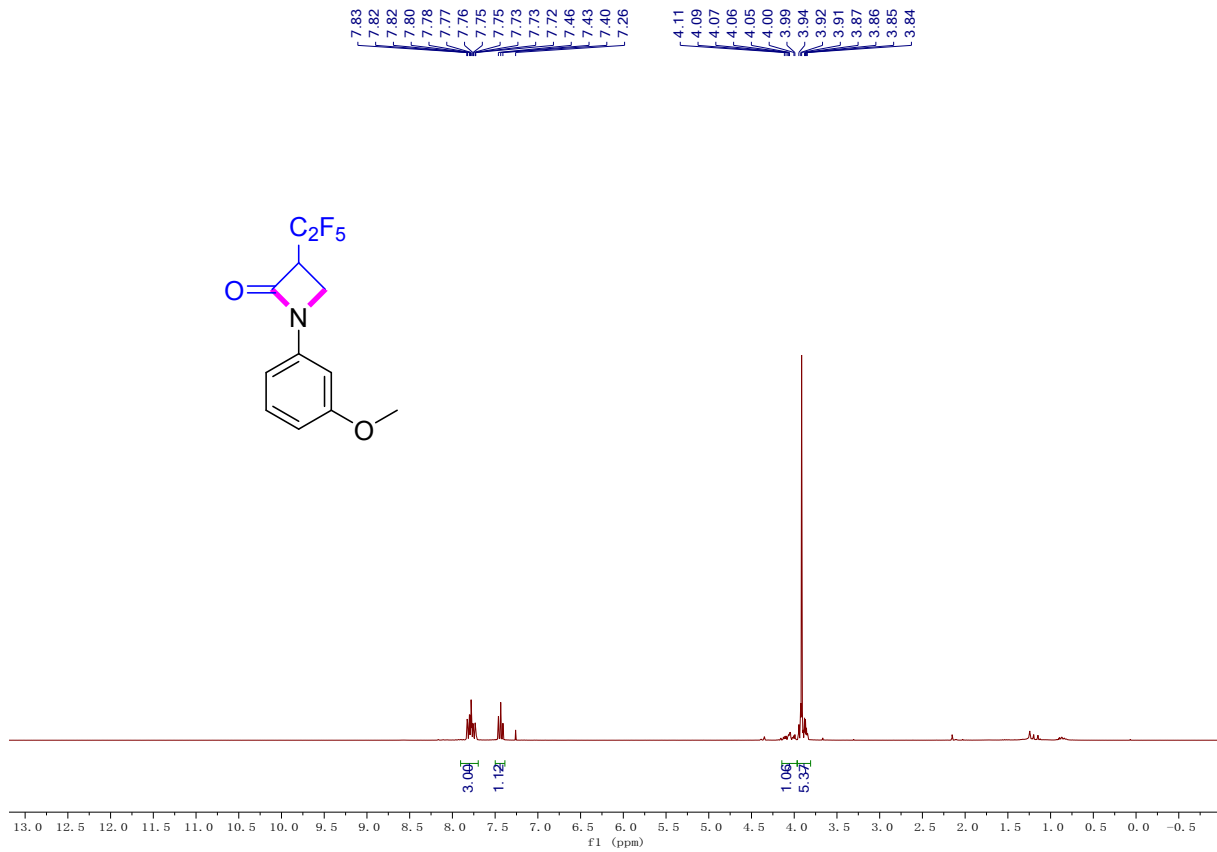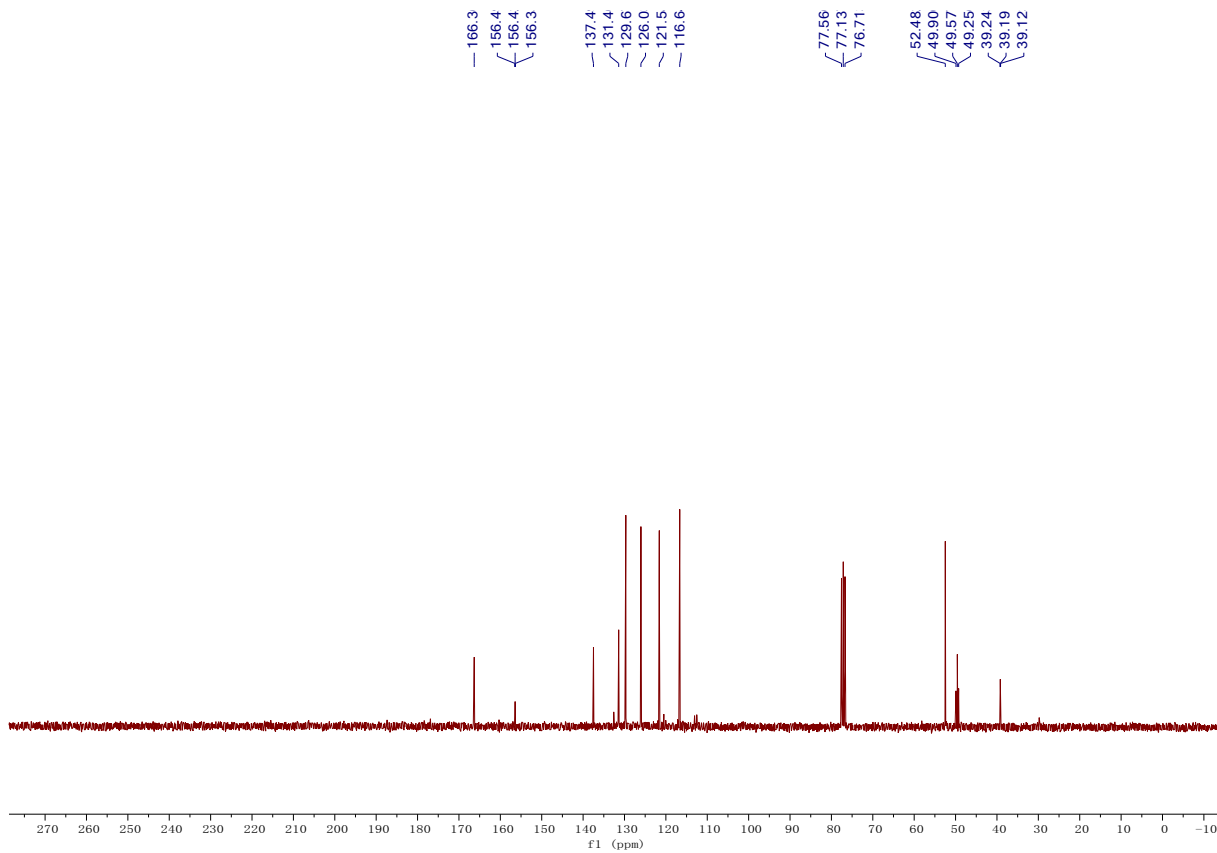

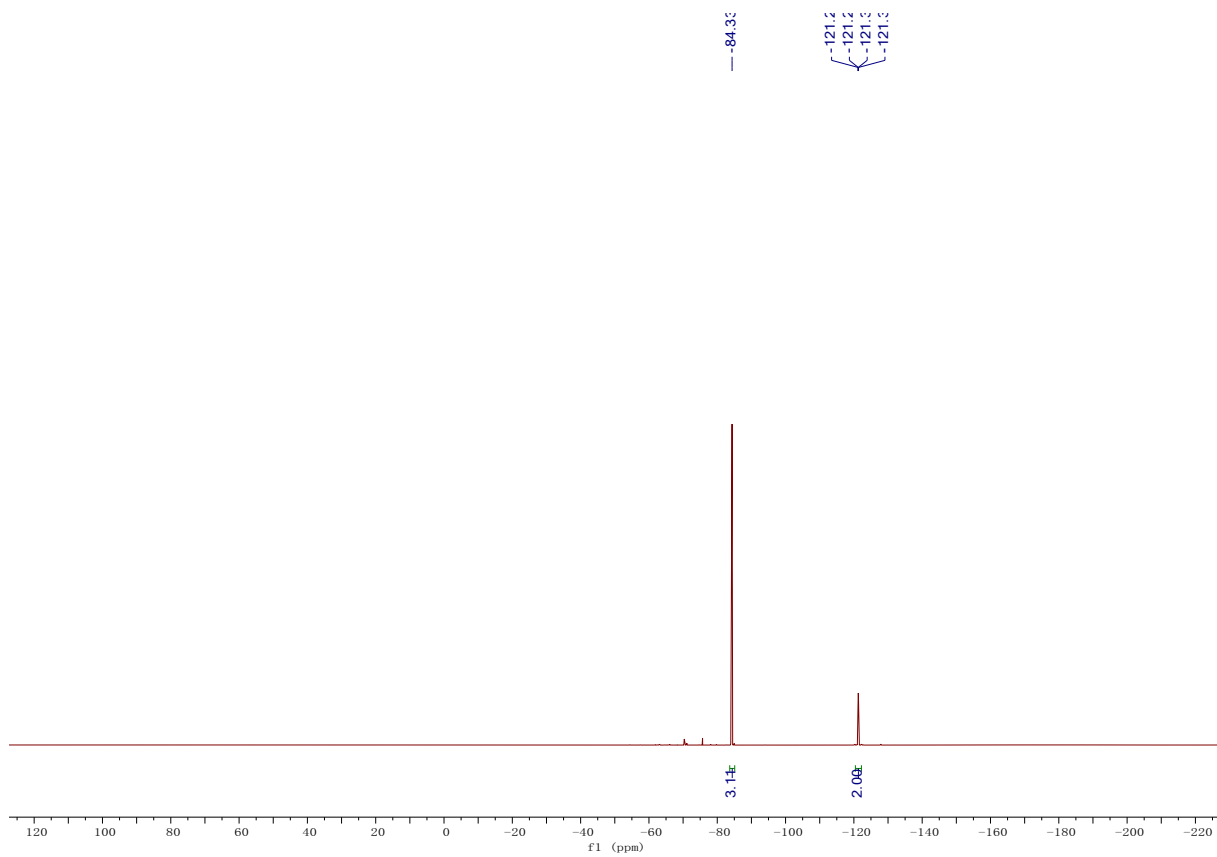

7.78, 7.77, 7.77, 7.75, 7.74, 7.74, 7.72, 7.72, 7.71, 7.68, 7.68, 7.67, 7.41, 7.40, 7.38, 7.35, 7.35, 7.19, 4.06, 4.03, 3.99, 3.99, 3.97, 3.93, 3.88, 3.84, 3.82, 3.81, 3.79, 3.78

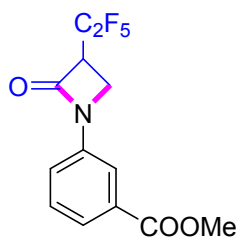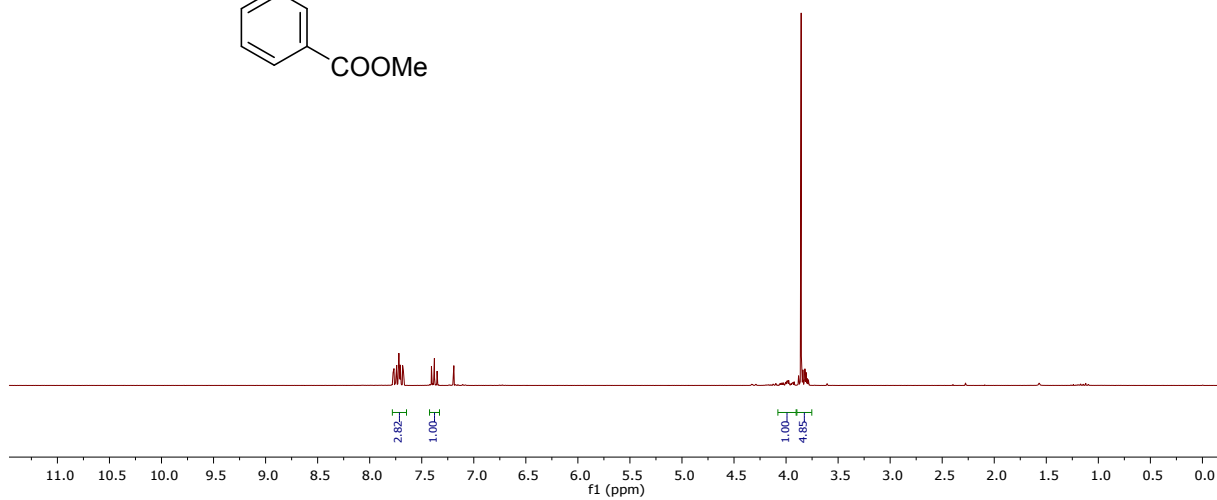

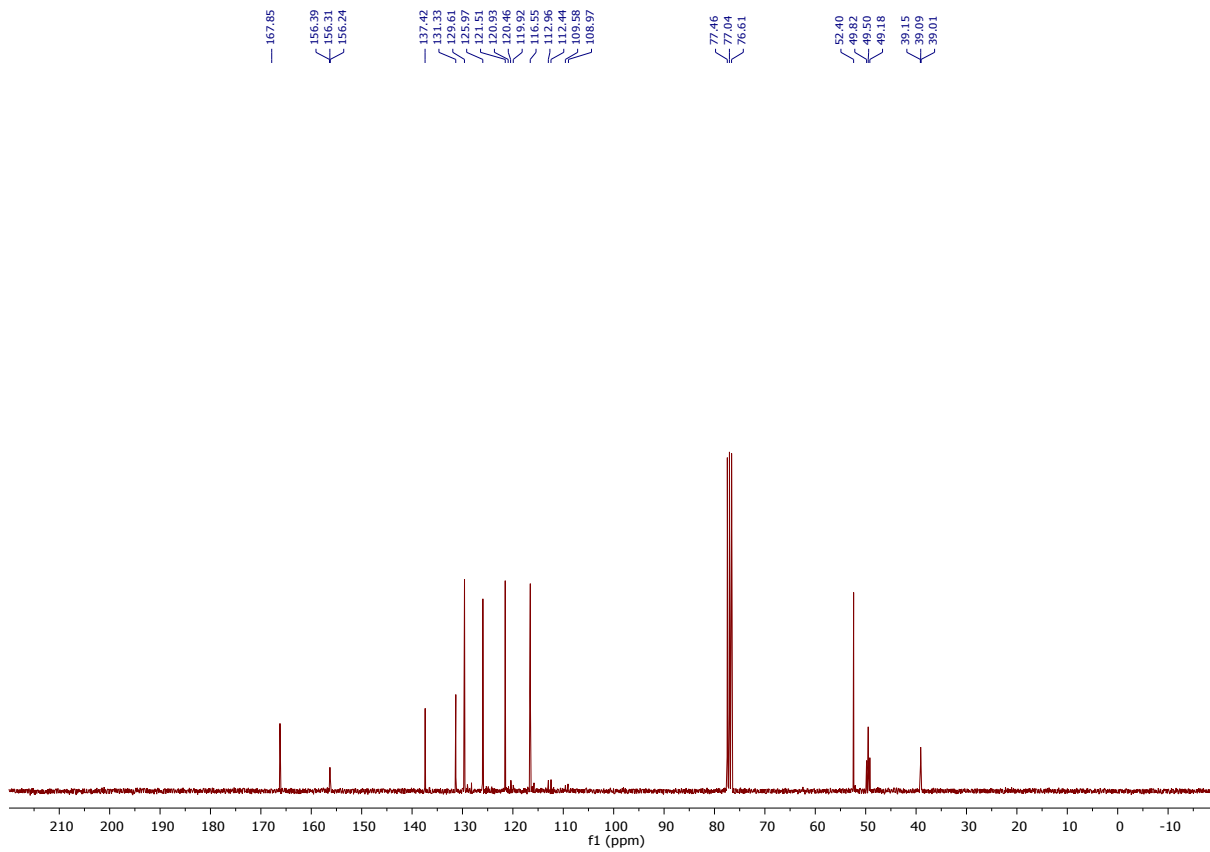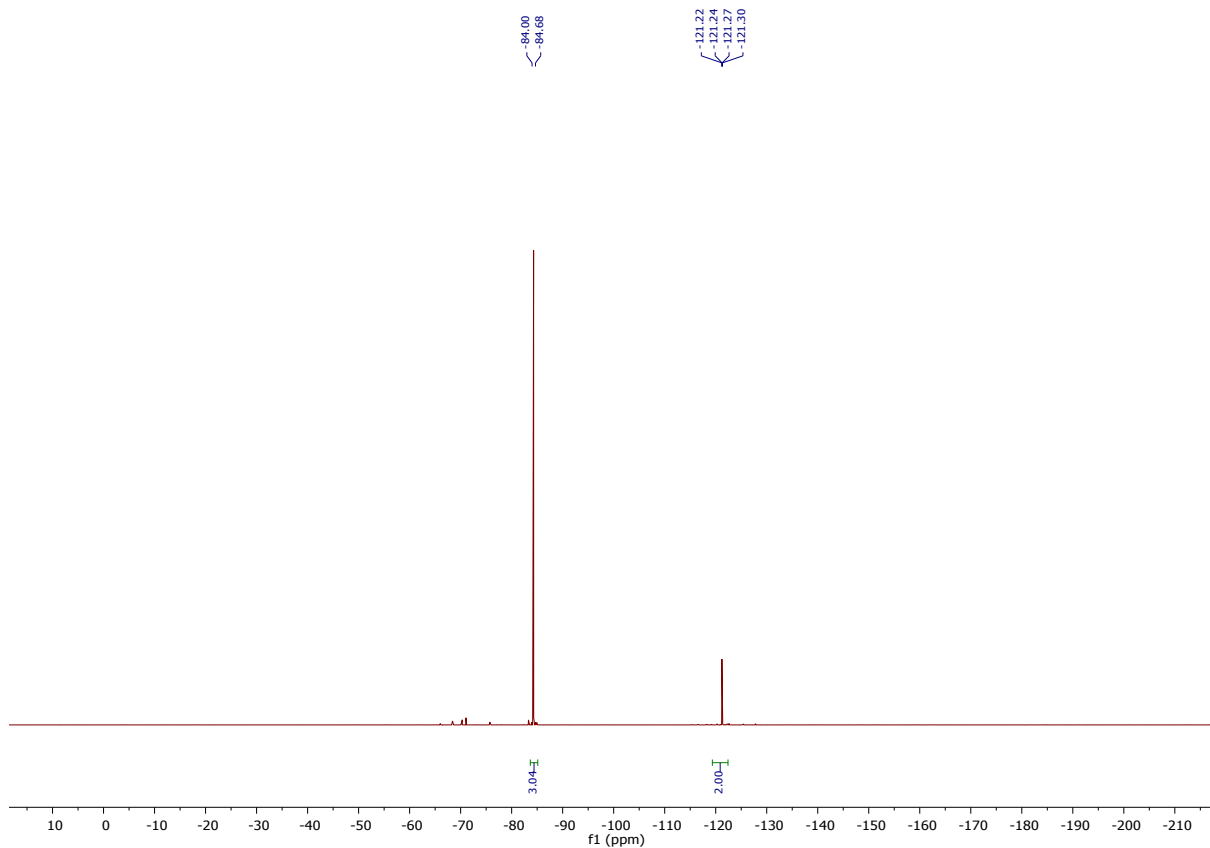



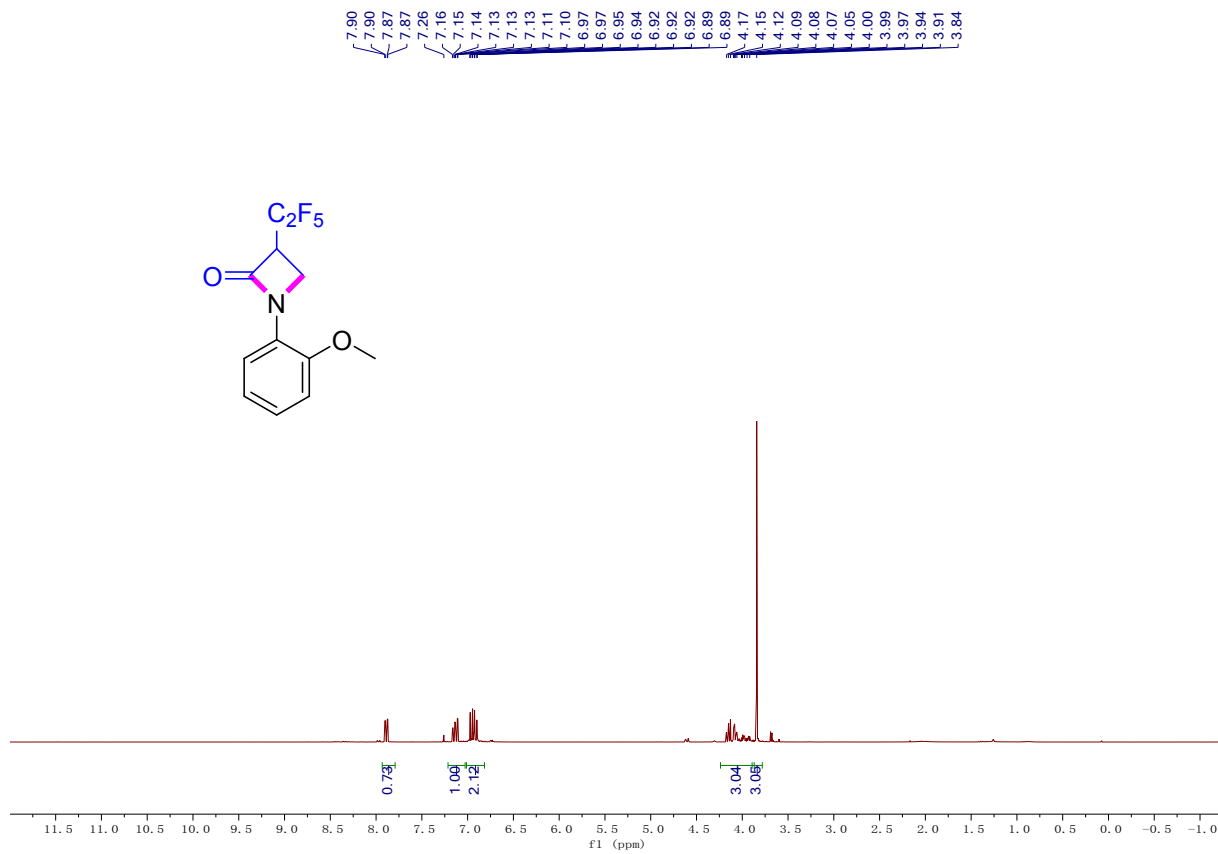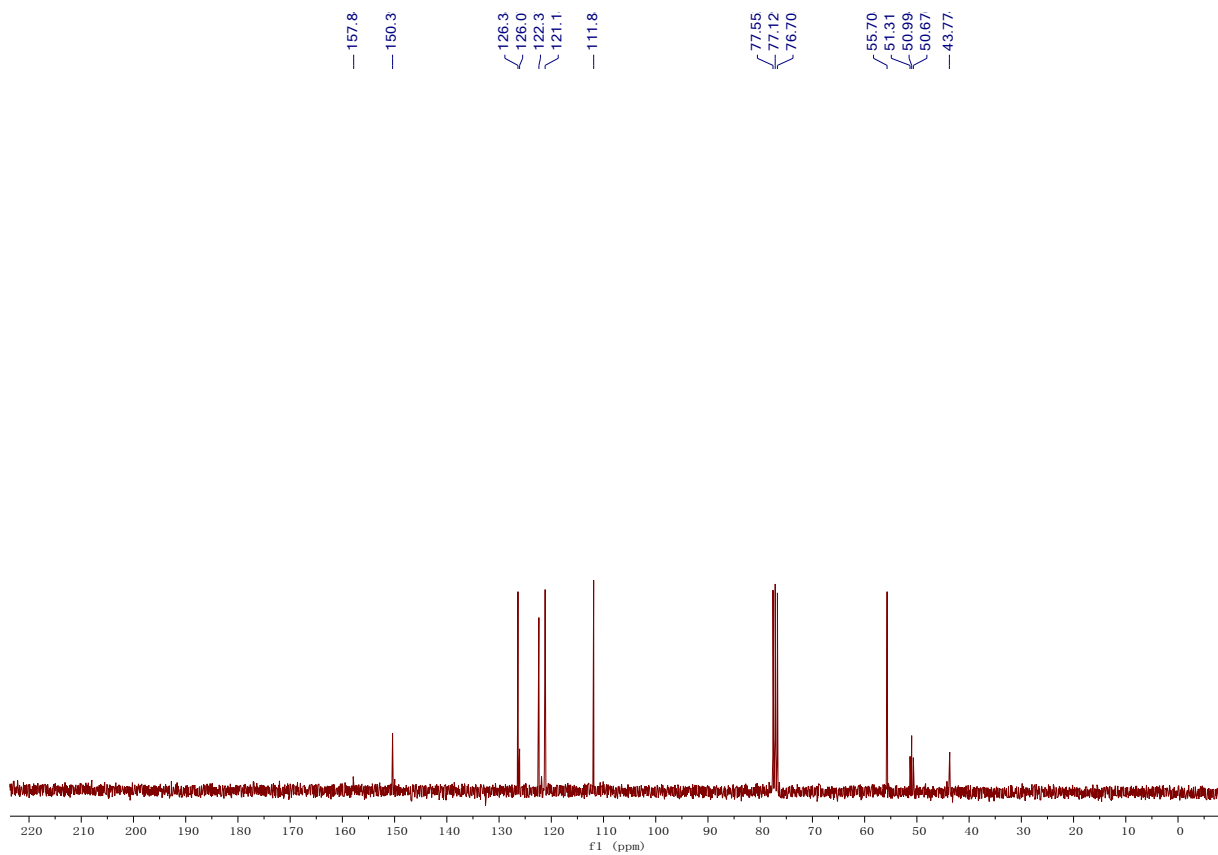

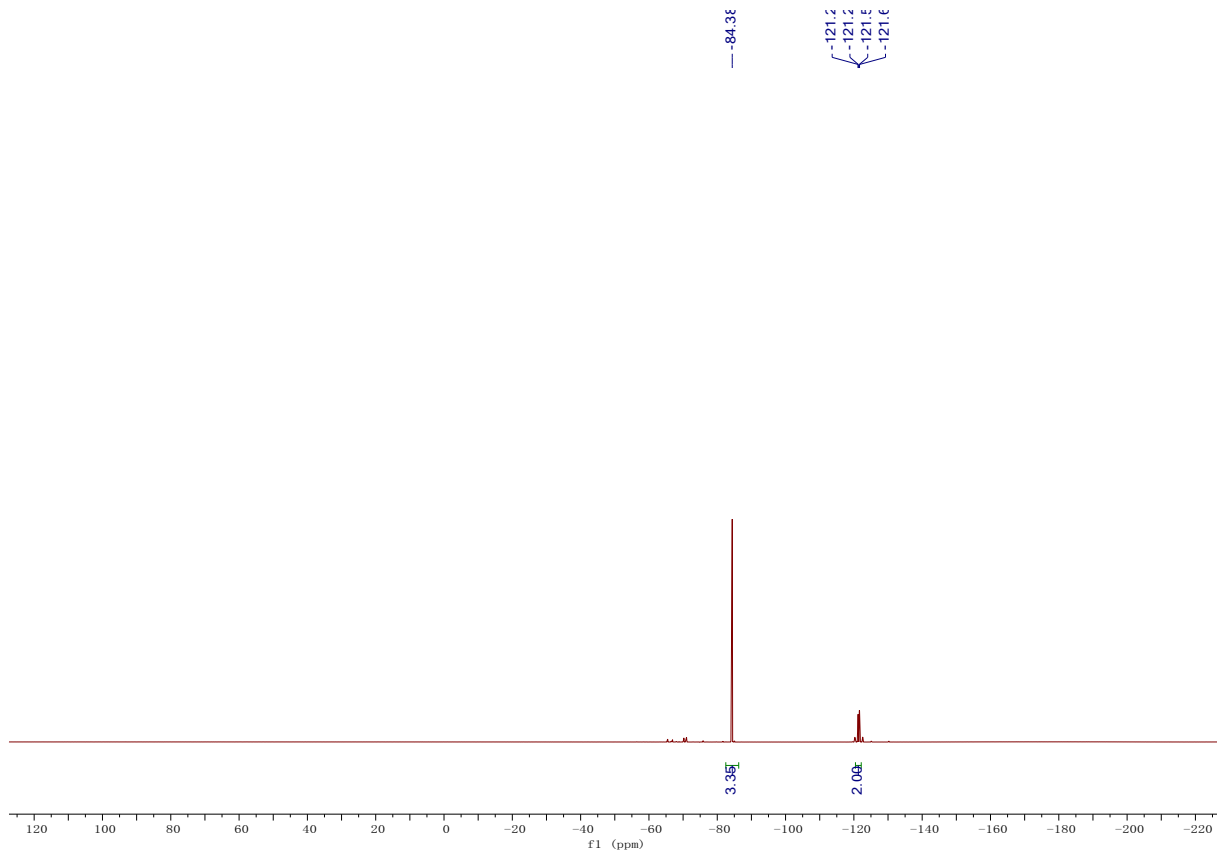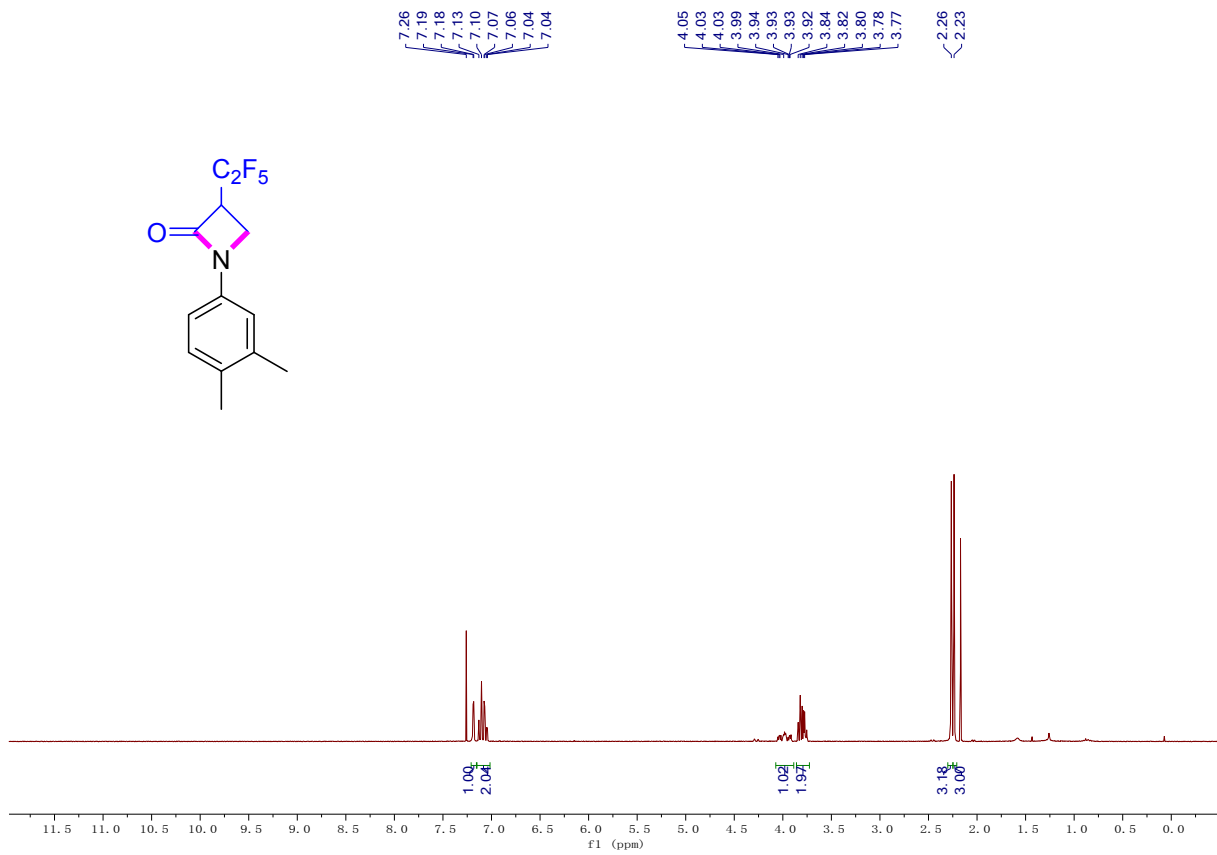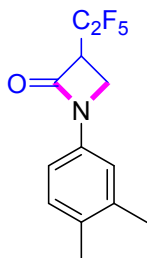

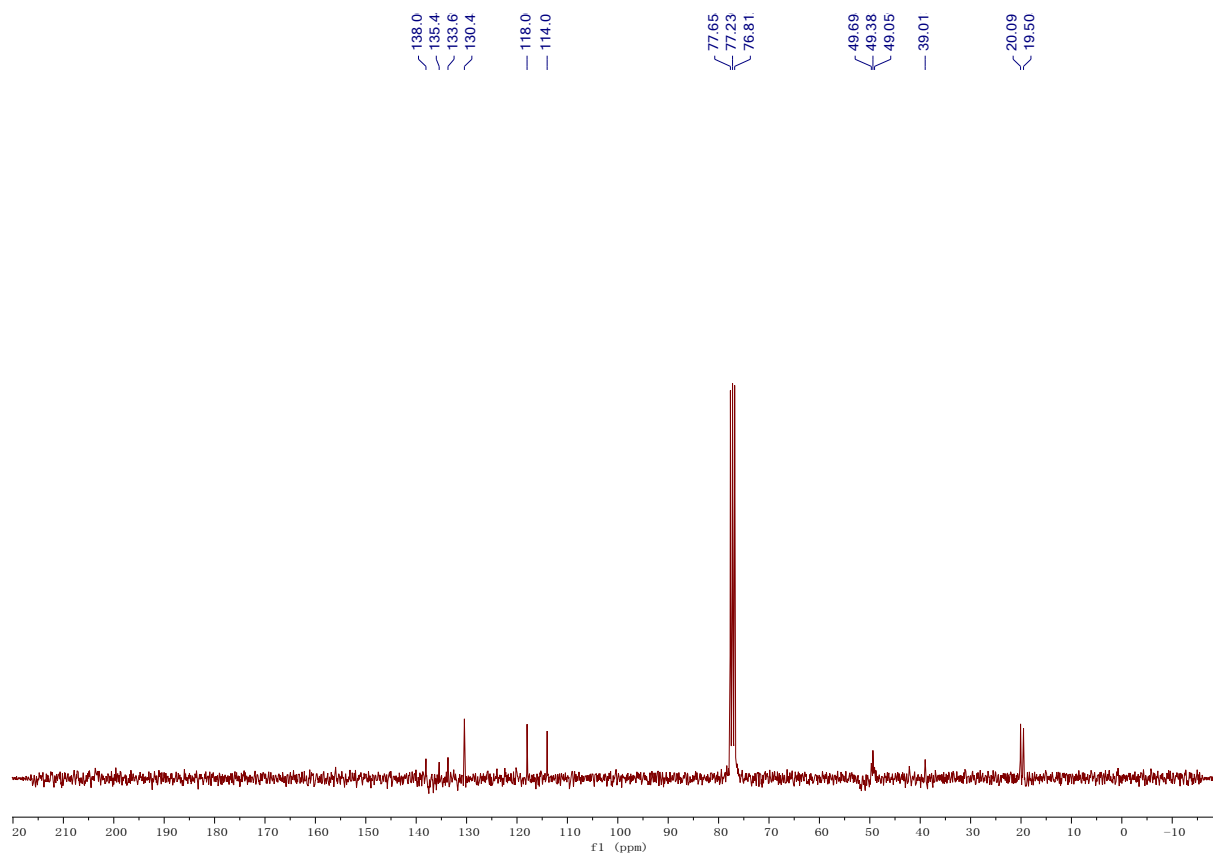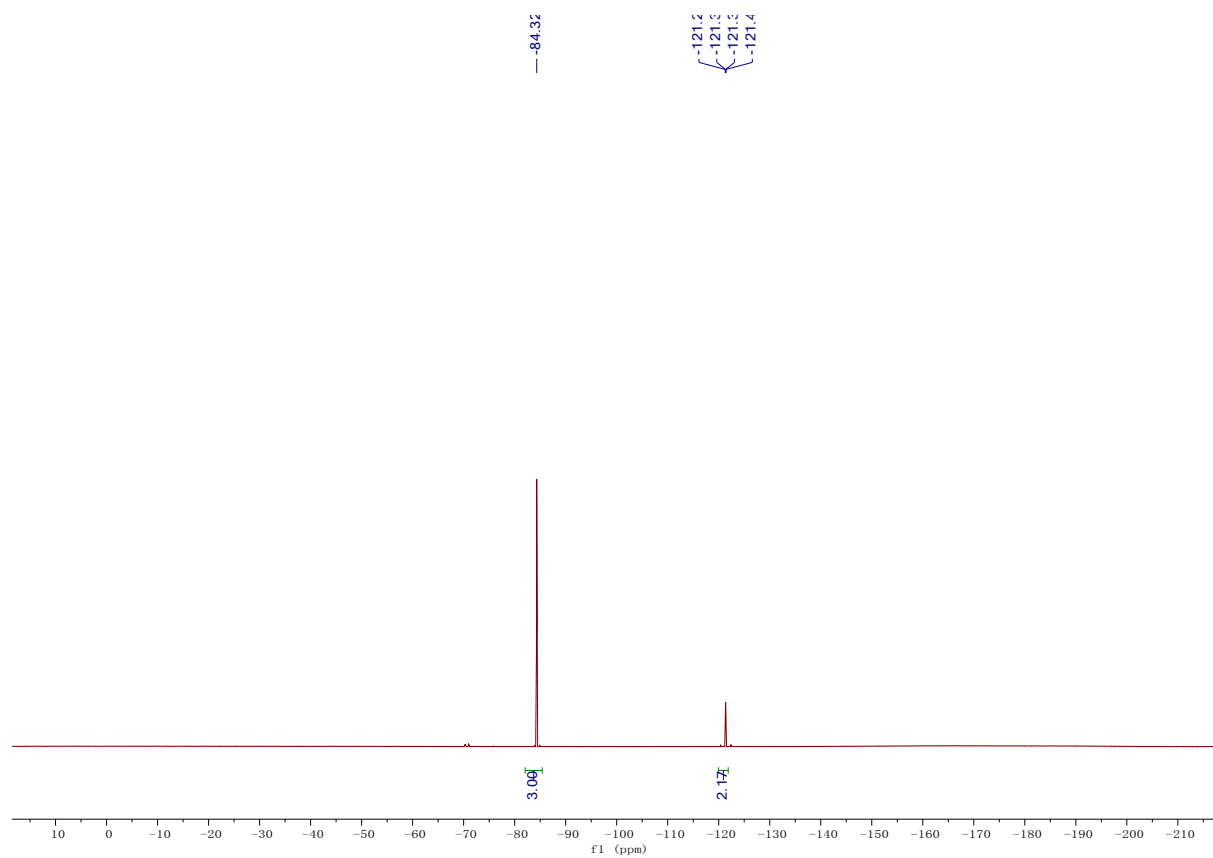

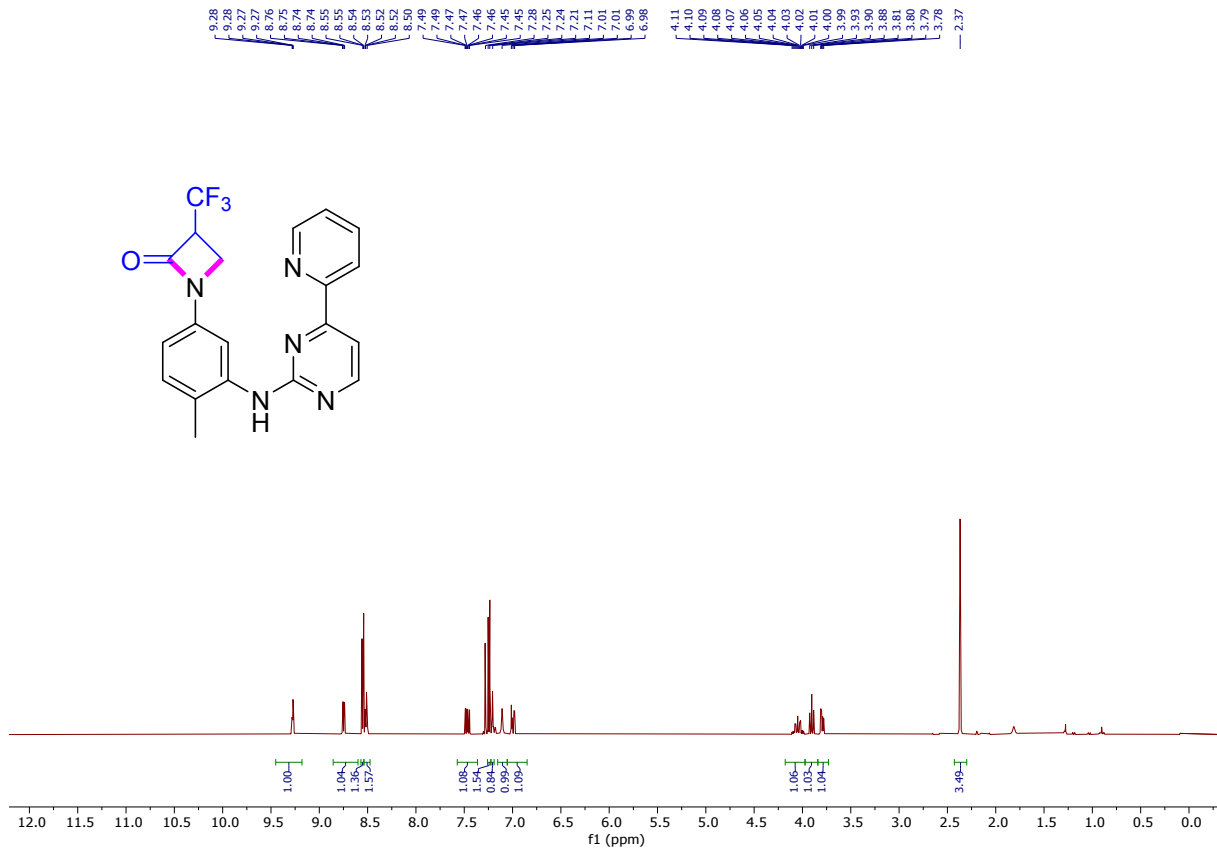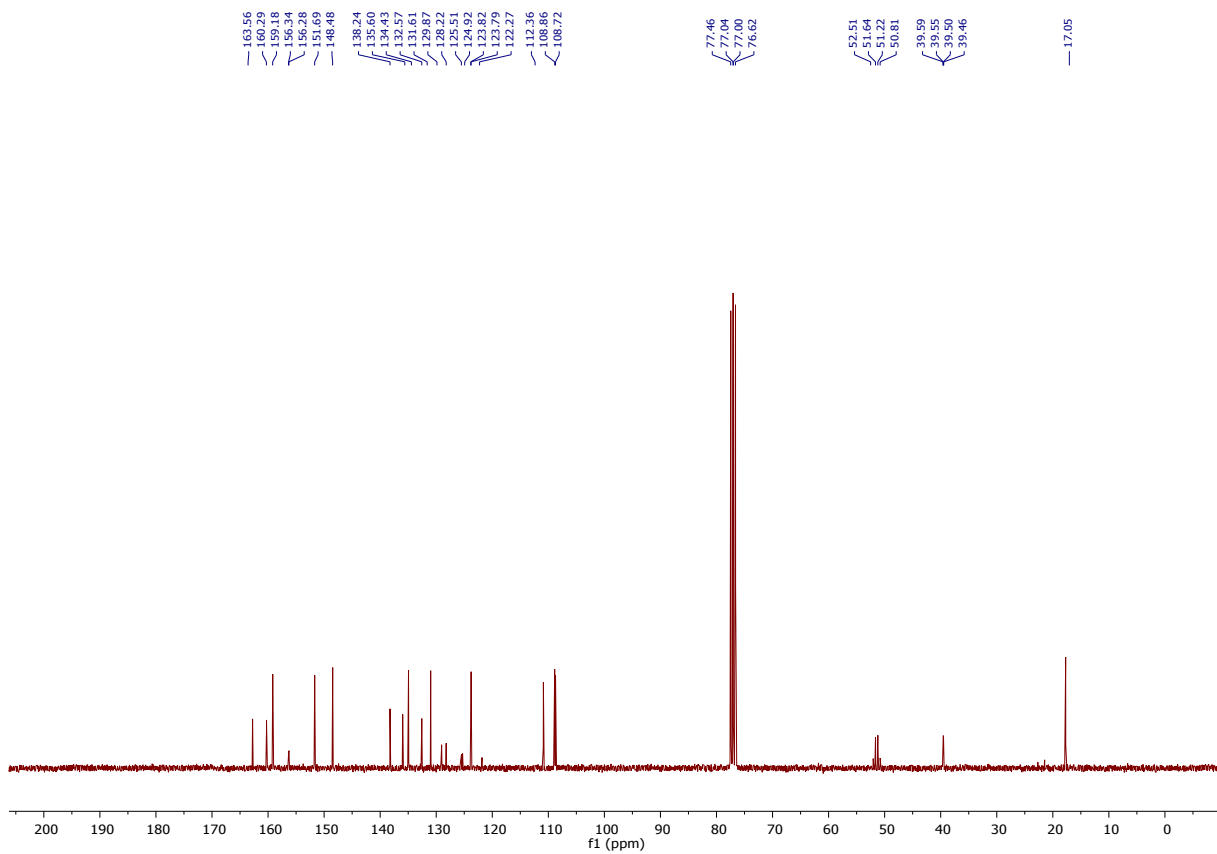

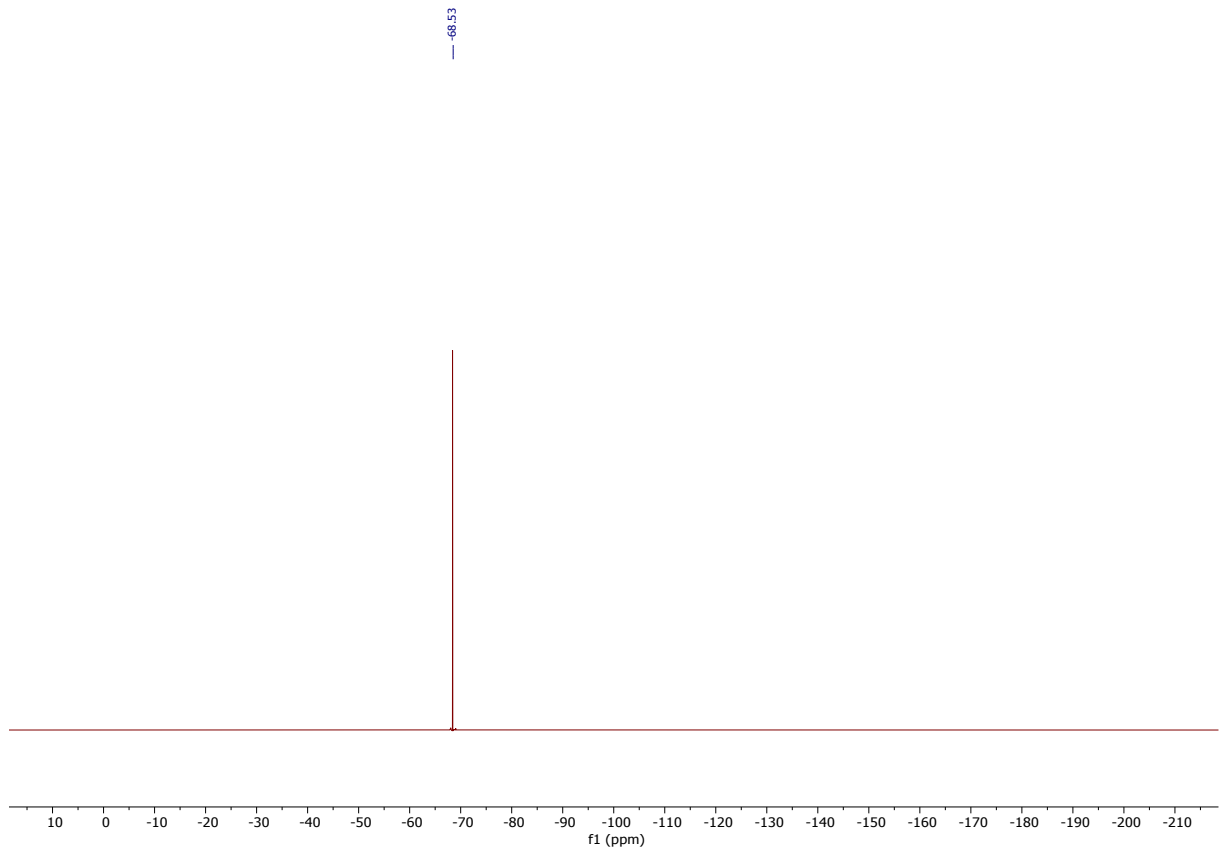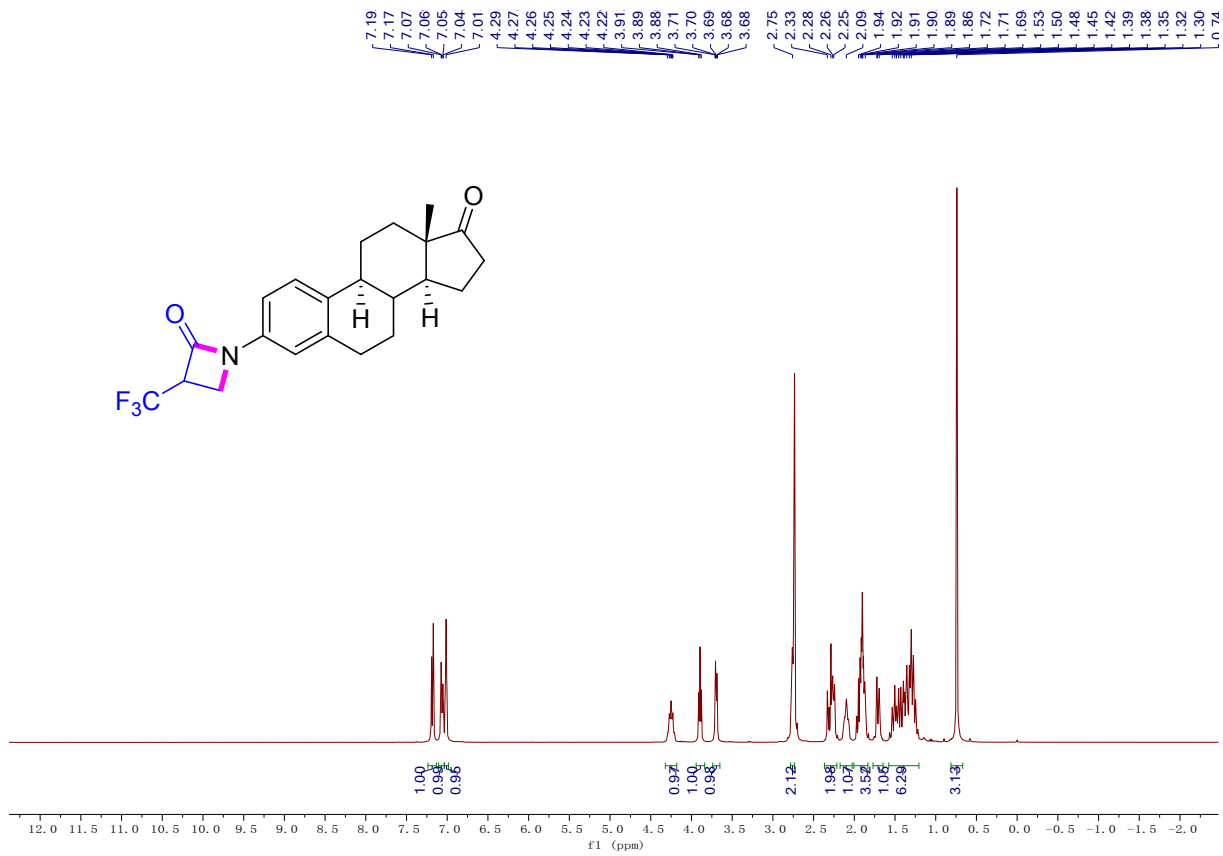

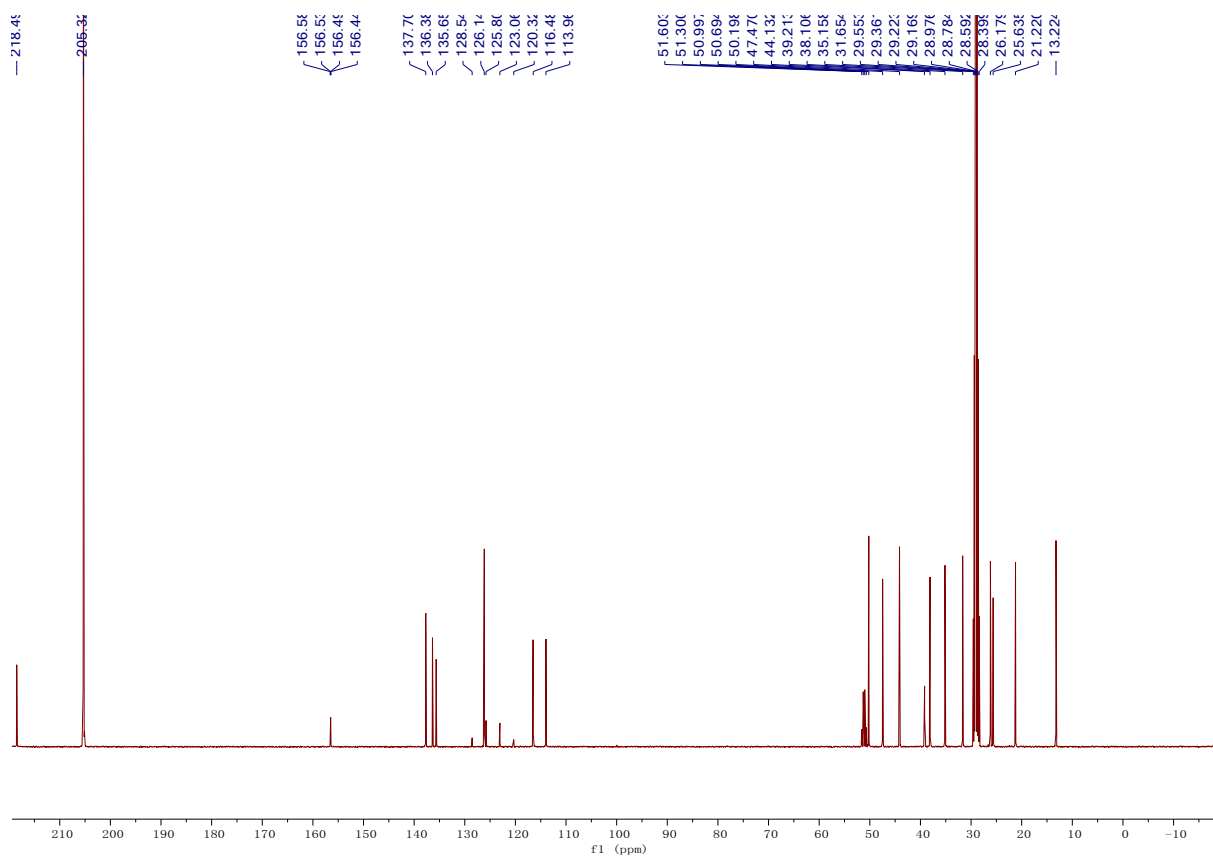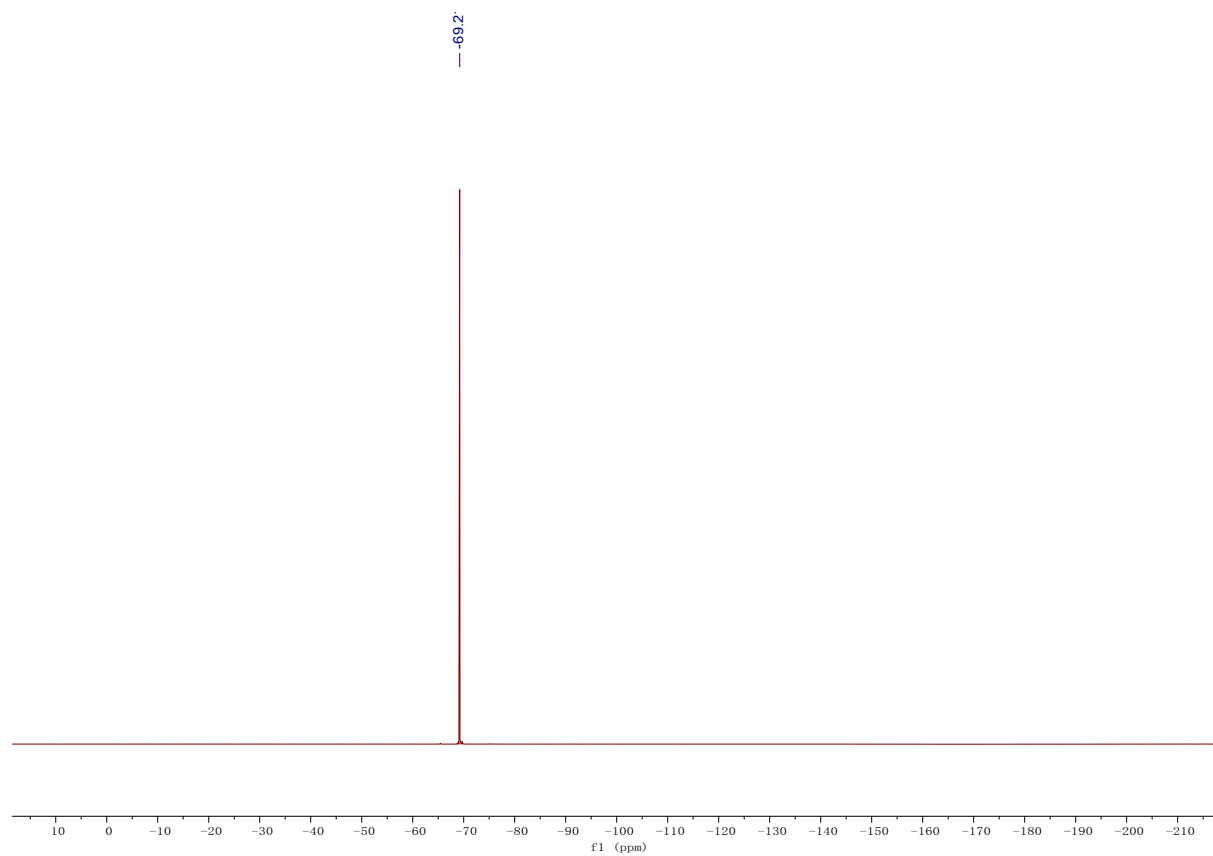

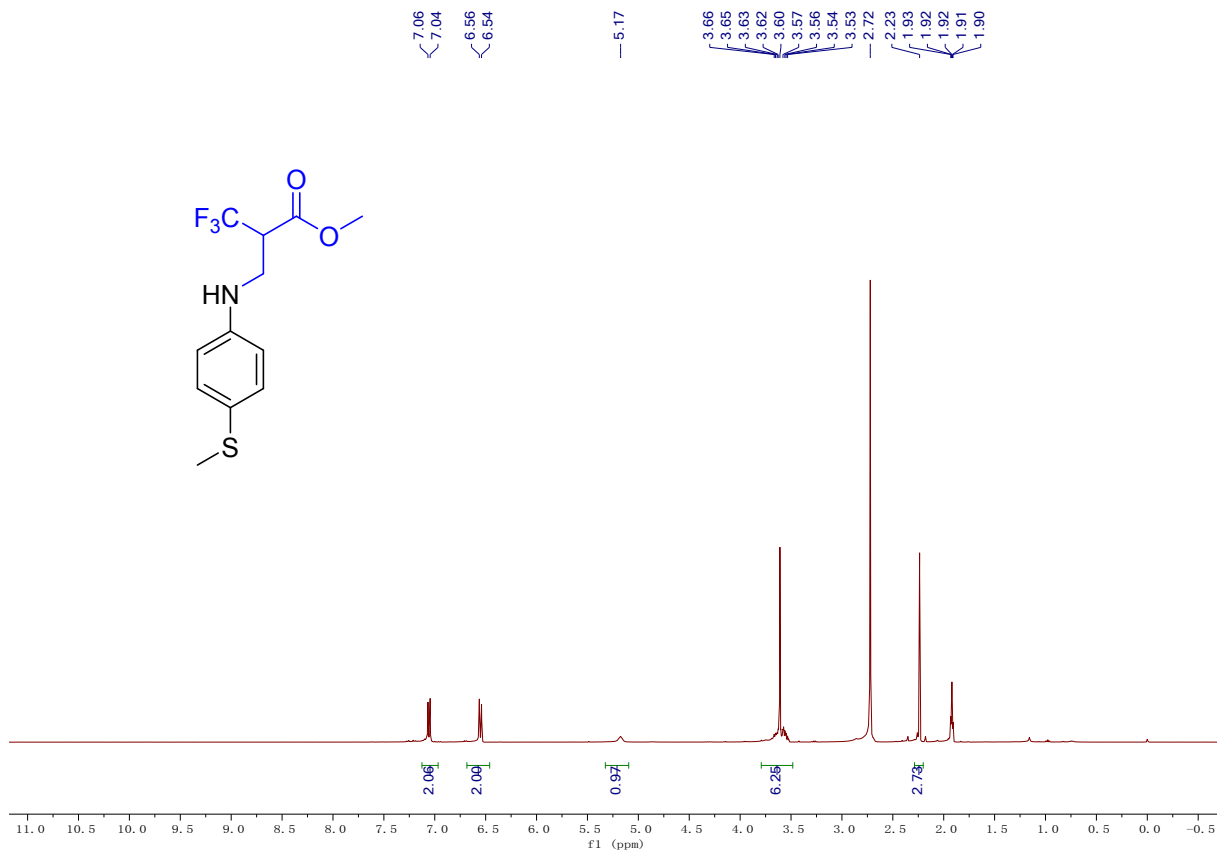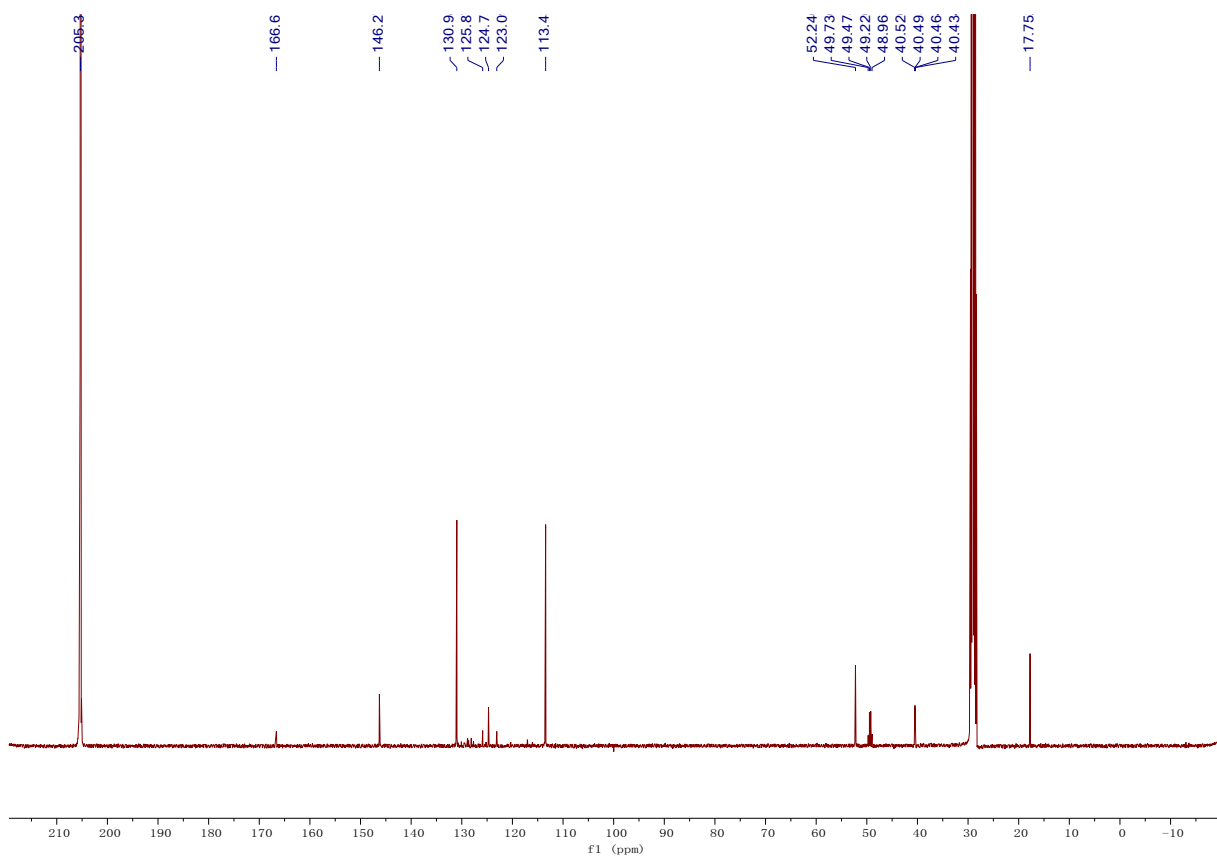

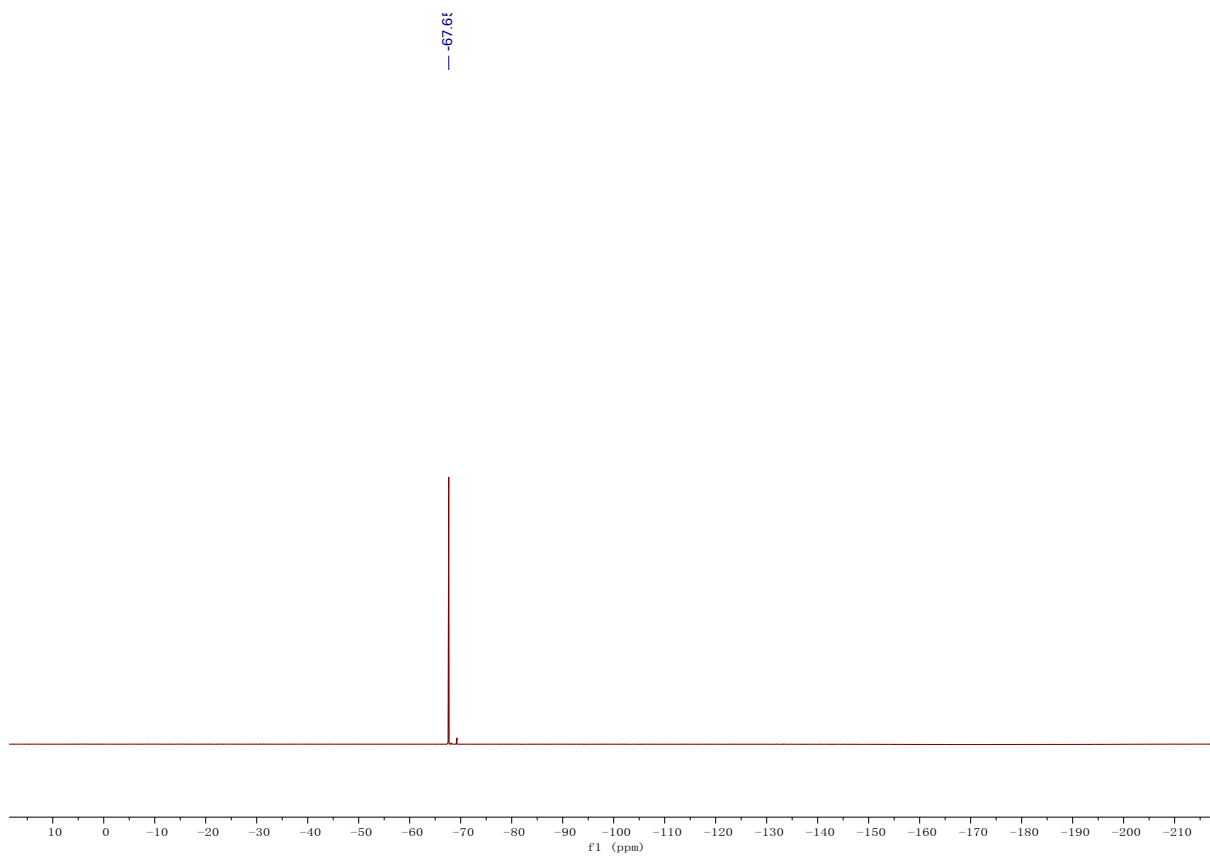



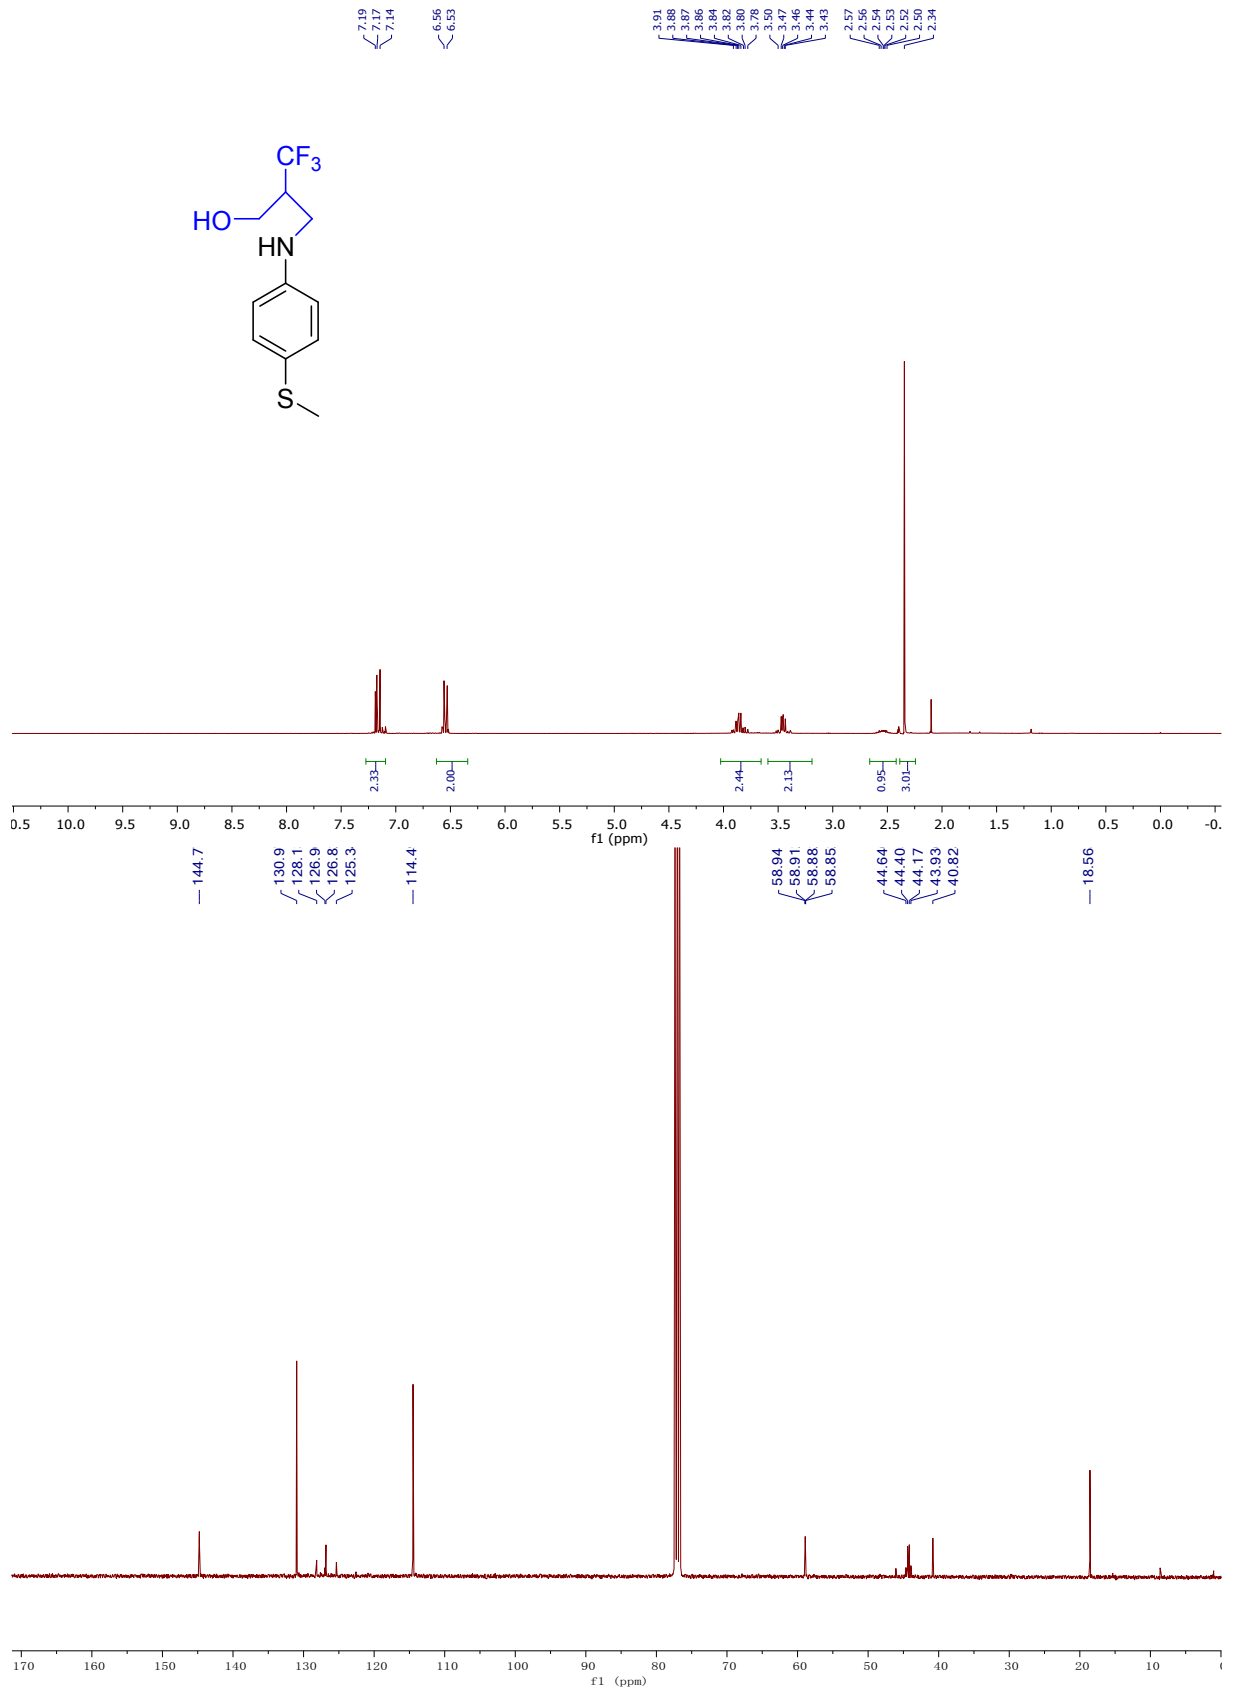

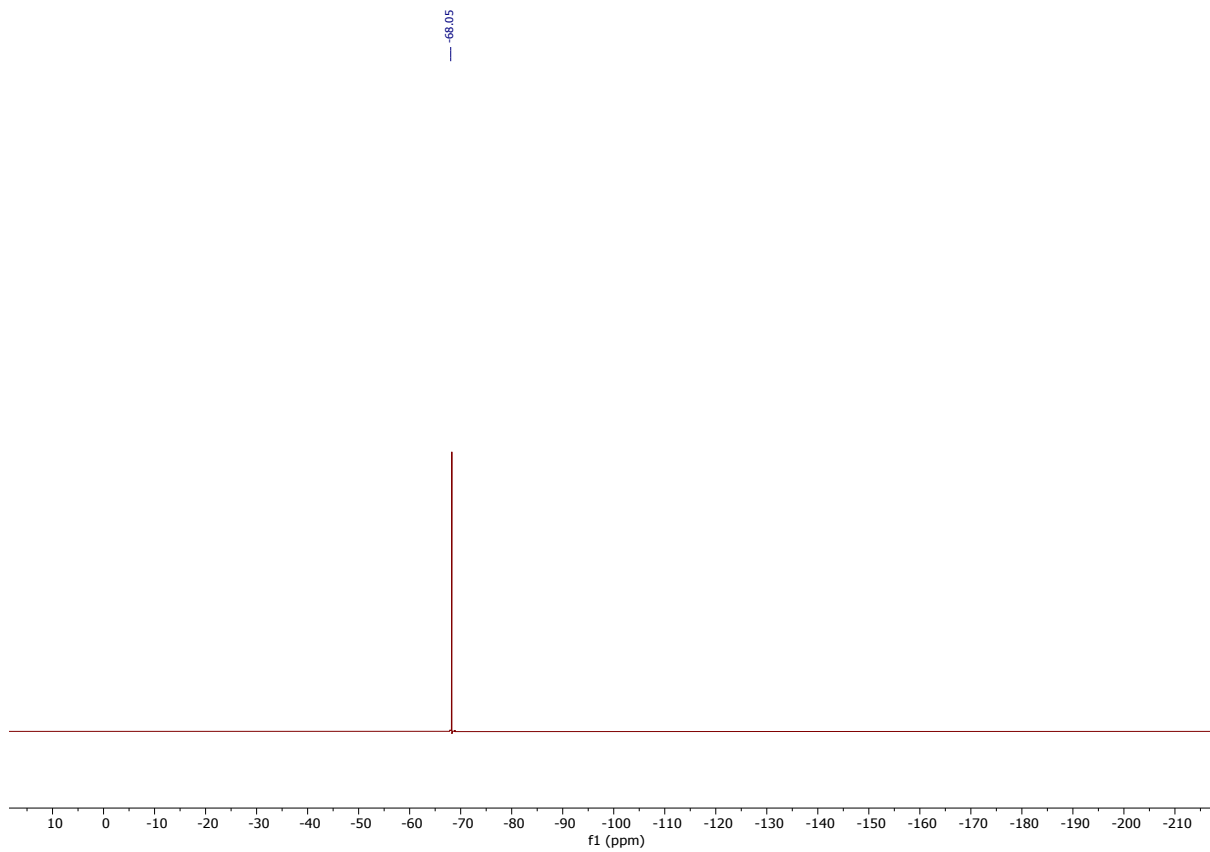

Supplement: d1sc02212a1.pdf [file d1sc02212a1.pdf]
